# Supplementary material
Source: Springer Nature journal article supplement (https://www.springermedizin.de/resource/supplementary/12885_2011_3651_MOESM3_ESM.pdf/9463050)
Supplement: MOESM3 [file 9463050]

**Order of genes**

| in the heatmap | Unique id                       | UG cluster                | Gene symbol                     | Map Location |
|----------------|---------------------------------|---------------------------|---------------------------------|--------------|
| 1              | <a href="#">THC2560976</a>      |                           | <a href="#">THC2560976</a>      |              |
| 2              | <a href="#">BC022881</a>        | <a href="#">Hs.652926</a> | <a href="#">LOC644450</a>       |              |
| 3              | <a href="#">NM_203414</a>       | <a href="#">Hs.417029</a> | <a href="#">C17orf81</a>        | 17p13.1      |
| 4              | <a href="#">NM_178537</a>       | <a href="#">Hs.148074</a> | <a href="#">B4GALNT4</a>        | 11p15.5      |
| 5              | <a href="#">NR_001564</a>       | <a href="#">Hs.529901</a> | <a href="#">XIST</a>            | Xq13.2       |
| 6              | <a href="#">BC020847</a>        | <a href="#">Hs.644600</a> | <a href="#">LOC644246</a>       | 17q21.31     |
| 7              | <a href="#">NM_001828</a>       | <a href="#">Hs.889</a>    | <a href="#">CLC</a>             | 19q13.2      |
| 8              | <a href="#">NM_173549</a>       | <a href="#">Hs.171455</a> | <a href="#">C8orf47</a>         | 8q22.2       |
| 9              | <a href="#">ENST00000302057</a> | <a href="#">Hs.282089</a> | <a href="#">IRX2</a>            | 5p15.33      |
| 10             | <a href="#">NM_002344</a>       | <a href="#">Hs.434481</a> | <a href="#">LTK</a>             | 15q15.1      |
| 11             | <a href="#">NM_002220</a>       | <a href="#">Hs.2722</a>   | <a href="#">ITPKA</a>           | 15q15.1      |
| 12             | <a href="#">THC2536817</a>      |                           | <a href="#">THC2536817</a>      | 2q31.1       |
| 13             | <a href="#">NM_172113</a>       | <a href="#">Hs.472877</a> | <a href="#">EYA2</a>            | 20q13.12     |
| 14             | <a href="#">NM_032391</a>       | <a href="#">Hs.116467</a> | <a href="#">PRAC</a>            | 17q21.32     |
| 15             | <a href="#">NM_006361</a>       | <a href="#">Hs.66731</a>  | <a href="#">HOXB13</a>          | 17q21.32     |
| 16             | <a href="#">NM_001884</a>       | <a href="#">Hs.591758</a> | <a href="#">HAPLN1</a>          | 5q14.3       |
| 17             | <a href="#">NM_002054</a>       | <a href="#">Hs.516494</a> | <a href="#">GCG</a>             | 2q24.2       |
| 18             | <a href="#">NM_001819</a>       | <a href="#">Hs.516874</a> | <a href="#">CHGB</a>            | 20p12.3      |
| 19             | <a href="#">NM_017852</a>       | <a href="#">Hs.369279</a> | <a href="#">NLRP2</a>           | 19q13.42     |
| 20             | <a href="#">NM_001012978</a>    | <a href="#">Hs.47209</a>  | <a href="#">NGFRAP1L1</a>       | Xq22.1       |
| 21             | <a href="#">NM_006198</a>       | <a href="#">Hs.80296</a>  | <a href="#">PCP4</a>            | 21q22.2      |
| 22             | <a href="#">NM_005987</a>       | <a href="#">Hs.46320</a>  | <a href="#">SPRR1A</a>          | 1q21.3       |
| 23             | <a href="#">NM_005408</a>       | <a href="#">Hs.414629</a> | <a href="#">CCL13</a>           | 17q12        |
| 24             | <a href="#">NM_001911</a>       | <a href="#">Hs.421724</a> | <a href="#">CTSG</a>            | 14q12        |
| 25             | <a href="#">NM_024025</a>       | <a href="#">Hs.8719</a>   | <a href="#">DUSP26</a>          | 8p12         |
| 26             | <a href="#">NM_018286</a>       | <a href="#">Hs.173233</a> | <a href="#">TMEM100</a>         | 17q22        |
| 27             | <a href="#">ENST00000370548</a> |                           | <a href="#">ENST00000370548</a> | 1p22.3       |
| 28             | <a href="#">NM_006741</a>       | <a href="#">Hs.505662</a> | <a href="#">PPP1R1A</a>         | 12q13.2      |
| 29             | <a href="#">NM_181789</a>       | <a href="#">Hs.526441</a> | <a href="#">GLDN</a>            | 15q21.2      |
| 30             | <a href="#">NM_003381</a>       | <a href="#">Hs.53973</a>  | <a href="#">VIP</a>             | 6q25.2       |
| 31             | <a href="#">NM_001721</a>       | <a href="#">Hs.495731</a> | <a href="#">BMX</a>             | Xp22.2       |
| 32             | <a href="#">NM_005398</a>       | <a href="#">Hs.303090</a> | <a href="#">PPP1R3C</a>         | 10q23.32     |
| 33             | <a href="#">NM_033014</a>       | <a href="#">Hs.109439</a> | <a href="#">OGN</a>             | 9q22.31      |
| 34             | <a href="#">NM_004750</a>       | <a href="#">Hs.114948</a> | <a href="#">CRLF1</a>           | 19p13.11     |
| 35             | <a href="#">NM_004181</a>       | <a href="#">Hs.518731</a> | <a href="#">UCHL1</a>           | 4p13         |
| 36             | <a href="#">NM_000898</a>       | <a href="#">Hs.654473</a> | <a href="#">MAOB</a>            | Xp11.3       |
| 37             | <a href="#">NM_003012</a>       | <a href="#">Hs.213424</a> | <a href="#">SFRP1</a>           | 8p11.21      |
| 38             | <a href="#">NM_006307</a>       | <a href="#">Hs.15154</a>  | <a href="#">SRPX</a>            | Xp11.4       |
| 39             | <a href="#">NM_198289</a>       | <a href="#">Hs.249129</a> | <a href="#">CIDEA</a>           | 18p11.21     |
| 40             | <a href="#">NM_007177</a>       | <a href="#">Hs.506357</a> | <a href="#">FAM107A</a>         | 3p14.2       |
| 41             | <a href="#">AF348994</a>        | <a href="#">Hs.513626</a> | <a href="#">MT1JP</a>           | 16q13        |
| 42             | <a href="#">NM_153370</a>       | <a href="#">Hs.25391</a>  | <a href="#">PI16</a>            | 6p21.2       |
| 43             | <a href="#">NM_000261</a>       | <a href="#">Hs.436037</a> | <a href="#">MYOC</a>            | 1q24.3       |
| 44             | <a href="#">NM_024730</a>       | <a href="#">Hs.115497</a> | <a href="#">FLJ22655</a>        | 12p12.3      |
| 45             | <a href="#">NM_138290</a>       | <a href="#">Hs.411488</a> | <a href="#">RPIB9</a>           | 7q21.12      |
| 46             | <a href="#">NM_002606</a>       | <a href="#">Hs.473927</a> | <a href="#">PDE9A</a>           | 21q22.3      |
| 47             | <a href="#">AK000158</a>        | <a href="#">Hs.210995</a> | <a href="#">CA12</a>            | 15q22.2      |
| 48             | <a href="#">NM_004816</a>       | <a href="#">Hs.118003</a> | <a href="#">C9orf61</a>         | 9q21.11      |
| 49             | <a href="#">NM_003759</a>       | <a href="#">Hs.5462</a>   | <a href="#">SLC4A4</a>          | 4q13.3       |

|     |                                 |                           |                              |          |
|-----|---------------------------------|---------------------------|------------------------------|----------|
| 50  | <a href="#">NM_000067</a>       | <a href="#">Hs.155097</a> | <a href="#">CA2</a>          | 8q21.2   |
| 51  | <a href="#">NM_006846</a>       | <a href="#">Hs.331555</a> | <a href="#">SPINK5</a>       | 5q33.1   |
| 52  | <a href="#">NM_014312</a>       | <a href="#">Hs.112377</a> | <a href="#">VSIG2</a>        | 11q24.2  |
| 53  | <a href="#">AK124946</a>        | <a href="#">Hs.162868</a> | <a href="#">DPF3</a>         | 14q24.2  |
| 54  | <a href="#">NM_017682</a>       | <a href="#">Hs.435611</a> | <a href="#">BEST2</a>        | 19p13.13 |
| 55  | <a href="#">ENST00000371483</a> |                           | <a href="#">GPR120</a>       | 10q23.33 |
| 56  | <a href="#">NM_006615</a>       | <a href="#">Hs.498021</a> | <a href="#">CAPN9</a>        | 1q42.2   |
| 57  | <a href="#">THC2721785</a>      |                           | <a href="#">THC2721785</a>   | 1p33     |
| 58  | <a href="#">THC2559929</a>      |                           | <a href="#">THC2559929</a>   | 14q32.33 |
| 59  | <a href="#">NM_002614</a>       | <a href="#">Hs.444751</a> | <a href="#">PDZK1</a>        | 1q21.1   |
| 60  | <a href="#">NM_152672</a>       | <a href="#">Hs.651164</a> | <a href="#">OSTalpha</a>     | 3q29     |
| 61  | <a href="#">NM_000862</a>       | <a href="#">Hs.364941</a> | <a href="#">HSD3B1</a>       | 1p12     |
| 62  | <a href="#">NM_005123</a>       | <a href="#">Hs.282735</a> | <a href="#">NR1H4</a>        | 12q23.1  |
| 63  | <a href="#">NM_173625</a>       | <a href="#">Hs.439154</a> | <a href="#">C17orf78</a>     | 17q12    |
| 64  | <a href="#">NM_176782</a>       | <a href="#">Hs.554944</a> | <a href="#">C1orf179</a>     | 1p32.3   |
| 65  | <a href="#">NM_001169</a>       | <a href="#">Hs.176658</a> | <a href="#">AQP8</a>         | 16p12.1  |
| 66  | <a href="#">NM_001275</a>       | <a href="#">Hs.150793</a> | <a href="#">CHGA</a>         | 14q32.12 |
| 67  | <a href="#">NM_004827</a>       | <a href="#">Hs.480218</a> | <a href="#">ABCG2</a>        | 4q22.1   |
| 68  | <a href="#">NM_004160</a>       | <a href="#">Hs.169249</a> | <a href="#">PYY</a>          | 17q21.31 |
| 69  | <a href="#">NM_005478</a>       | <a href="#">Hs.251380</a> | <a href="#">INSL5</a>        | 1p31.3   |
| 70  | <a href="#">NM_017716</a>       | <a href="#">Hs.272789</a> | <a href="#">MS4A12</a>       | 11q12.2  |
| 71  | <a href="#">A_32_P157213</a>    |                           | <a href="#">A_32_P157213</a> | 19q13.31 |
| 72  | <a href="#">NM_033553</a>       | <a href="#">Hs.778</a>    | <a href="#">GUCA2A</a>       | 1p34.2   |
| 73  | <a href="#">NM_012128</a>       | <a href="#">Hs.567422</a> | <a href="#">CLCA4</a>        | 1p22.3   |
| 74  | <a href="#">AI659667</a>        | <a href="#">Hs.516105</a> | <a href="#">AI659667</a>     | 2p13.1   |
| 75  | <a href="#">NM_139250</a>       | <a href="#">Hs.559536</a> | <a href="#">CTAG1A</a>       | Xq28     |
| 76  | <a href="#">NM_000870</a>       | <a href="#">Hs.483773</a> | <a href="#">HTR4</a>         | 5q33.1   |
| 77  | <a href="#">A_32_P171043</a>    |                           | <a href="#">A_32_P171043</a> | 18q21.32 |
| 78  | <a href="#">NM_002196</a>       | <a href="#">Hs.89584</a>  | <a href="#">INSM1</a>        | 20p11.23 |
| 79  | <a href="#">THC2686967</a>      |                           | <a href="#">THC2686967</a>   | 17q25.1  |
| 80  | <a href="#">NM_017878</a>       | <a href="#">Hs.272805</a> | <a href="#">HRASLS2</a>      | 11q12.3  |
| 81  | <a href="#">NM_020973</a>       | <a href="#">Hs.653107</a> | <a href="#">GBA3</a>         | 4p15.31  |
| 82  | <a href="#">NM_006919</a>       | <a href="#">Hs.227948</a> | <a href="#">SERPINB3</a>     | 18q21.33 |
| 83  | <a href="#">A_32_P166653</a>    |                           | <a href="#">A_32_P166653</a> | 1q41     |
| 84  | <a href="#">CB959193</a>        | <a href="#">Hs.97644</a>  | <a href="#">CB959193</a>     | 11q12.3  |
| 85  | <a href="#">NM_006998</a>       | <a href="#">Hs.116428</a> | <a href="#">SCGN</a>         | 6p22.2   |
| 86  | <a href="#">NM_021637</a>       | <a href="#">Hs.45140</a>  | <a href="#">TMEM35</a>       | Xq22.1   |
| 87  | <a href="#">NM_000717</a>       | <a href="#">Hs.89485</a>  | <a href="#">CA4</a>          | 17q23.1  |
| 88  | <a href="#">NM_001738</a>       | <a href="#">Hs.23118</a>  | <a href="#">CA1</a>          | 8q21.2   |
| 89  | <a href="#">NM_007102</a>       | <a href="#">Hs.32966</a>  | <a href="#">GUCA2B</a>       | 1p34.2   |
| 90  | <a href="#">AK124400</a>        | <a href="#">Hs.652438</a> | <a href="#">LOC553137</a>    | 6q21     |
| 91  | <a href="#">NM_022843</a>       | <a href="#">Hs.391781</a> | <a href="#">PCDH20</a>       | 13q21.31 |
| 92  | <a href="#">NM_000112</a>       | <a href="#">Hs.302738</a> | <a href="#">SLC26A2</a>      | 5q33.1   |
| 93  | <a href="#">NM_000111</a>       | <a href="#">Hs.1650</a>   | <a href="#">SLC26A3</a>      | 7q31.1   |
| 94  | <a href="#">NM_178859</a>       | <a href="#">Hs.534533</a> | <a href="#">OSTbeta</a>      | 15q22.31 |
| 95  | <a href="#">NM_002010</a>       | <a href="#">Hs.111</a>    | <a href="#">FGF9</a>         | 13q12.11 |
| 96  | <a href="#">NM_014033</a>       | <a href="#">Hs.655369</a> | <a href="#">METTL7A</a>      | 12q13.13 |
| 97  | <a href="#">NM_145259</a>       | <a href="#">Hs.352338</a> | <a href="#">ACVR1C</a>       | 2q24.1   |
| 98  | <a href="#">AF435956</a>        | <a href="#">Hs.591566</a> | <a href="#">FAM82A</a>       | 2p22.2   |
| 99  | <a href="#">NM_173833</a>       | <a href="#">Hs.591833</a> | <a href="#">SCARA5</a>       | 8p21.1   |
| 100 | <a href="#">NM_000667</a>       | <a href="#">Hs.654433</a> | <a href="#">ADH1A</a>        | 4q23     |
| 101 | <a href="#">NM_000669</a>       | <a href="#">Hs.654537</a> | <a href="#">ADH1C</a>        | 4q23     |

|     |                                 |                           |                              |          |
|-----|---------------------------------|---------------------------|------------------------------|----------|
| 102 | <a href="#">BC033223</a>        | <a href="#">Hs.372492</a> | <a href="#">SLC45A4</a>      | 8q24.3   |
| 103 | <a href="#">NM_002885</a>       | <a href="#">Hs.148178</a> | <a href="#">RAP1GAP</a>      | 1p36.12  |
| 104 | <a href="#">NM_001012506</a>    | <a href="#">Hs.476399</a> | <a href="#">CCDC66</a>       | 3p14.3   |
| 105 | <a href="#">BX119852</a>        | <a href="#">Hs.258100</a> | <a href="#">BX119852</a>     | 2p25.2   |
| 106 | <a href="#">AA479896</a>        | <a href="#">Hs.587119</a> | <a href="#">AA479896</a>     | 20p12.3  |
| 107 | <a href="#">NM_013347</a>       | <a href="#">Hs.659349</a> | <a href="#">RPA4</a>         | Xq21.33  |
| 108 | <a href="#">CV575560</a>        | <a href="#">Hs.659326</a> | <a href="#">CV575560</a>     | 17p11.2  |
| 109 | <a href="#">NM_020857</a>       | <a href="#">Hs.23876</a>  | <a href="#">VPS18</a>        | 15q15.1  |
| 110 | <a href="#">NM_182527</a>       | <a href="#">Hs.643608</a> | <a href="#">CABP7</a>        | 22q12.2  |
| 111 | <a href="#">THC2579650</a>      |                           | <a href="#">THC2579650</a>   | 15q26.1  |
| 112 | <a href="#">THC2609820</a>      |                           | <a href="#">THC2609820</a>   | 8p21.1   |
| 113 | <a href="#">THC2541992</a>      |                           | <a href="#">THC2541992</a>   | 1q32.1   |
| 114 | <a href="#">NM_005853</a>       | <a href="#">Hs.435730</a> | <a href="#">IRX5</a>         | 16q12.2  |
| 115 | <a href="#">CB162722</a>        | <a href="#">Hs.667977</a> | <a href="#">CB162722</a>     | 3p25.2   |
| 116 | <a href="#">NM_018047</a>       | <a href="#">Hs.202023</a> | <a href="#">RBM22</a>        | 5q33.1   |
| 117 | <a href="#">NM_014931</a>       | <a href="#">Hs.515610</a> | <a href="#">SAPS1</a>        | 19q13.42 |
| 118 | <a href="#">NM_024512</a>       | <a href="#">Hs.657345</a> | <a href="#">LRRC2</a>        | 3p21.31  |
| 119 | <a href="#">NM_014308</a>       | <a href="#">Hs.278901</a> | <a href="#">PIK3R5</a>       | 17p13.1  |
| 120 | <a href="#">THC2672701</a>      |                           | <a href="#">THC2672701</a>   | 17q25.3  |
| 121 | <a href="#">ENST00000314088</a> | <a href="#">Hs.622290</a> | <a href="#">HIST1H2AC</a>    | 6p22.1   |
| 122 | <a href="#">NM_005319</a>       | <a href="#">Hs.7644</a>   | <a href="#">HIST1H1C</a>     | 6p22.1   |
| 123 | <a href="#">A_23_P170713</a>    |                           | <a href="#">A_23_P170713</a> | 6p22.1   |
| 124 | <a href="#">NM_006980</a>       | <a href="#">Hs.532216</a> | <a href="#">MTERF</a>        | 7q21.2   |
| 125 | <a href="#">CR933606</a>        | <a href="#">Hs.653099</a> | <a href="#">C20orf80</a>     | 20q11.1  |
| 126 | <a href="#">NM_002252</a>       | <a href="#">Hs.414489</a> | <a href="#">KCNS3</a>        | 2p24.2   |
| 127 | <a href="#">NM_000313</a>       | <a href="#">Hs.64016</a>  | <a href="#">PROS1</a>        | 3q11.2   |
| 128 | <a href="#">CR627475</a>        | <a href="#">Hs.125038</a> | <a href="#">FAM92A1</a>      | 8q22.1   |
| 129 | <a href="#">NM_018476</a>       | <a href="#">Hs.334370</a> | <a href="#">BEX1</a>         | Xq22.1   |
| 130 | <a href="#">NM_032621</a>       | <a href="#">Hs.398989</a> | <a href="#">BEX2</a>         | Xq22.1   |
| 131 | <a href="#">NM_025176</a>       | <a href="#">Hs.631508</a> | <a href="#">RP4-691N24.1</a> | 20p11.21 |
| 132 | <a href="#">ENST00000372602</a> | <a href="#">Hs.496530</a> | <a href="#">TMSL8</a>        | Xq22.2   |
| 133 | <a href="#">NM_052969</a>       | <a href="#">Hs.647900</a> | <a href="#">RPL39L</a>       | 3q27.3   |
| 134 | <a href="#">NM_020685</a>       | <a href="#">Hs.47166</a>  | <a href="#">C3orf14</a>      | 3p14.2   |
| 135 | <a href="#">NM_014766</a>       | <a href="#">Hs.520740</a> | <a href="#">SCRN1</a>        | 7p15.1   |
| 136 | <a href="#">NM_001454</a>       | <a href="#">Hs.651204</a> | <a href="#">FOXJ1</a>        | 17q25.1  |
| 137 | <a href="#">NM_024532</a>       | <a href="#">Hs.602792</a> | <a href="#">SPAG16</a>       | 2q34     |
| 138 | <a href="#">NR_002166</a>       | <a href="#">Hs.446620</a> | <a href="#">SEDLP</a>        | 19q13.43 |
| 139 | <a href="#">NM_021632</a>       | <a href="#">Hs.407694</a> | <a href="#">ZNF350</a>       | 19q13.33 |
| 140 | <a href="#">NM_198542</a>       | <a href="#">Hs.579576</a> | <a href="#">ZNF773</a>       | 19q13.43 |
| 141 | <a href="#">NM_005773</a>       | <a href="#">Hs.596242</a> | <a href="#">ZNF256</a>       | 19q13.43 |
| 142 | <a href="#">NM_023926</a>       | <a href="#">Hs.235390</a> | <a href="#">ZSCAN18</a>      | 19q13.43 |
| 143 | <a href="#">NM_022804</a>       | <a href="#">Hs.564847</a> | <a href="#">SNURF</a>        | 15q11.2  |
| 144 | <a href="#">NM_004052</a>       | <a href="#">Hs.144873</a> | <a href="#">BNIP3</a>        | 10q26.3  |
| 145 | <a href="#">NM_016073</a>       | <a href="#">Hs.513954</a> | <a href="#">HDGFRP3</a>      | 15q25.2  |
| 146 | <a href="#">THC2644897</a>      |                           | <a href="#">THC2644897</a>   | 12p12.2  |
| 147 | <a href="#">NM_000484</a>       | <a href="#">Hs.693586</a> | <a href="#">APP</a>          | 21q21.3  |
| 148 | <a href="#">NM_152718</a>       | <a href="#">Hs.60640</a>  | <a href="#">VWCE</a>         | 11q12.2  |
| 149 | <a href="#">NM_025135</a>       | <a href="#">Hs.436636</a> | <a href="#">FHOD3</a>        | 18q12.2  |
| 150 | <a href="#">NM_016848</a>       | <a href="#">Hs.656806</a> | <a href="#">SHC3</a>         | 9q22.1   |
| 151 | <a href="#">NM_014344</a>       | <a href="#">Hs.39384</a>  | <a href="#">FJX1</a>         | 11p13    |
| 152 | <a href="#">NM_182898</a>       | <a href="#">Hs.437075</a> | <a href="#">CREB5</a>        | 7p15.1   |
| 153 | <a href="#">NM_003102</a>       | <a href="#">Hs.2420</a>   | <a href="#">SOD3</a>         | 4p15.2   |

|     |                                 |                           |                              |          |
|-----|---------------------------------|---------------------------|------------------------------|----------|
| 154 | <a href="#">NM_007283</a>       | <a href="#">Hs.277035</a> | <a href="#">MGLL</a>         | 3q21.3   |
| 155 | <a href="#">NM_020182</a>       | <a href="#">Hs.517155</a> | <a href="#">TMEPAI</a>       | 20q13.31 |
| 156 | <a href="#">NM_003043</a>       | <a href="#">Hs.529488</a> | <a href="#">SLC6A6</a>       | 3p25.1   |
| 157 | <a href="#">NM_000358</a>       | <a href="#">Hs.369397</a> | <a href="#">TGFB1</a>        | 5q31.2   |
| 158 | <a href="#">ENST00000382327</a> | <a href="#">Hs.156727</a> | <a href="#">ANKH</a>         | 5p15.2   |
| 159 | <a href="#">NM_005978</a>       | <a href="#">Hs.516484</a> | <a href="#">S100A2</a>       | 1q21.3   |
| 160 | <a href="#">NM_198129</a>       | <a href="#">Hs.436367</a> | <a href="#">LAMA3</a>        | 18q11.2  |
| 161 | <a href="#">NM_018891</a>       | <a href="#">Hs.591484</a> | <a href="#">LAMC2</a>        | 1q25.3   |
| 162 | <a href="#">NM_005562</a>       | <a href="#">Hs.591484</a> | <a href="#">LAMC2</a>        | 1q25.3   |
| 163 | <a href="#">NM_002423</a>       | <a href="#">Hs.2256</a>   | <a href="#">MMP7</a>         | 11q22.2  |
| 164 | <a href="#">NM_014220</a>       | <a href="#">Hs.351316</a> | <a href="#">TM4SF1</a>       | 3q25.1   |
| 165 | <a href="#">NM_020130</a>       | <a href="#">Hs.591849</a> | <a href="#">C8orf4</a>       | 8p11.21  |
| 166 | <a href="#">NM_018948</a>       | <a href="#">Hs.605445</a> | <a href="#">ERRFI1</a>       | 1p36.23  |
| 167 | <a href="#">NM_003897</a>       | <a href="#">Hs.655404</a> | <a href="#">IER3</a>         | 6p21.33  |
| 168 | <a href="#">AL832183</a>        | <a href="#">Hs.436426</a> | <a href="#">LOC284454</a>    | 19p13.12 |
| 169 | <a href="#">NM_006186</a>       | <a href="#">Hs.563344</a> | <a href="#">NR4A2</a>        | 2q24.1   |
| 170 | <a href="#">NM_005252</a>       | <a href="#">Hs.25647</a>  | <a href="#">FOS</a>          | 14q24.3  |
| 171 | <a href="#">NM_004024</a>       | <a href="#">Hs.460</a>    | <a href="#">ATF3</a>         | 1q32.3   |
| 172 | <a href="#">NM_002135</a>       | <a href="#">Hs.524430</a> | <a href="#">NR4A1</a>        | 12q13.13 |
| 173 | <a href="#">NM_001964</a>       | <a href="#">Hs.326035</a> | <a href="#">EGR1</a>         | 5q31.2   |
| 174 | <a href="#">NM_005213</a>       | <a href="#">Hs.518198</a> | <a href="#">CSTA</a>         | 3q21.1   |
| 175 | <a href="#">NM_000032</a>       | <a href="#">Hs.522666</a> | <a href="#">ALAS2</a>        | Xp11.21  |
| 176 | <a href="#">NM_000518</a>       | <a href="#">Hs.654454</a> | <a href="#">HBB</a>          | 11p15.4  |
| 177 | <a href="#">NM_000519</a>       | <a href="#">Hs.523443</a> | <a href="#">HBD</a>          | 11p15.4  |
| 178 | <a href="#">A_24_P147849</a>    |                           | <a href="#">A_24_P147849</a> |          |
| 179 | <a href="#">NM_000517</a>       | <a href="#">Hs.654744</a> | <a href="#">HBA2</a>         | 16p13.3  |
| 180 | <a href="#">NM_000558</a>       | <a href="#">Hs.449630</a> | <a href="#">HBA1</a>         | 16p13.3  |
| 181 | <a href="#">NM_006512</a>       | <a href="#">Hs.654493</a> | <a href="#">SAA4</a>         | 11p15.1  |
| 182 | <a href="#">NM_030754</a>       | <a href="#">Hs.654517</a> | <a href="#">SAA2</a>         | 11p15.1  |
| 183 | <a href="#">NM_000331</a>       | <a href="#">Hs.632144</a> | <a href="#">SAA1</a>         | 11p15.1  |
| 184 | <a href="#">NM_031419</a>       | <a href="#">Hs.319171</a> | <a href="#">NFKBIZ</a>       | 3q12.3   |
| 185 | <a href="#">NM_005204</a>       | <a href="#">Hs.432453</a> | <a href="#">MAP3K8</a>       | 10p11.23 |
| 186 | <a href="#">NM_005746</a>       | <a href="#">Hs.489615</a> | <a href="#">PBEF1</a>        | 7q22.2   |
| 187 | <a href="#">A_24_P592591</a>    |                           | <a href="#">A_24_P592591</a> | 10p11.21 |
| 188 | <a href="#">NM_004591</a>       | <a href="#">Hs.75498</a>  | <a href="#">CCL20</a>        | 2q36.3   |
| 189 | <a href="#">NM_001511</a>       | <a href="#">Hs.789</a>    | <a href="#">CXCL1</a>        | 4q13.3   |
| 190 | <a href="#">NM_002089</a>       | <a href="#">Hs.590921</a> | <a href="#">CXCL2</a>        | 4q13.3   |
| 191 | <a href="#">NM_002090</a>       | <a href="#">Hs.89690</a>  | <a href="#">CXCL3</a>        | 4q13.3   |
| 192 | <a href="#">NM_032895</a>       | <a href="#">Hs.597755</a> | <a href="#">MGC14376</a>     | 17p13.3  |
| 193 | <a href="#">AY358804</a>        | <a href="#">Hs.505141</a> | <a href="#">AY358804</a>     | 12p11.21 |
| 194 | <a href="#">NM_002160</a>       | <a href="#">Hs.143250</a> | <a href="#">TNC</a>          | 9q33.1   |
| 195 | <a href="#">NM_002658</a>       | <a href="#">Hs.77274</a>  | <a href="#">PLAU</a>         | 10q22.2  |
| 196 | <a href="#">NM_006474</a>       | <a href="#">Hs.468675</a> | <a href="#">PDPN</a>         | 1p36.21  |
| 197 | <a href="#">NM_003392</a>       | <a href="#">Hs.643085</a> | <a href="#">WNT5A</a>        | 3p14.3   |
| 198 | <a href="#">NM_002422</a>       | <a href="#">Hs.375129</a> | <a href="#">MMP3</a>         | 11q22.2  |
| 199 | <a href="#">NM_002421</a>       | <a href="#">Hs.83169</a>  | <a href="#">MMP1</a>         | 11q22.2  |
| 200 | <a href="#">NM_002994</a>       | <a href="#">Hs.89714</a>  | <a href="#">CXCL5</a>        | 4q13.3   |
| 201 | <a href="#">NM_002425</a>       | <a href="#">Hs.2258</a>   | <a href="#">MMP10</a>        | 11q22.2  |
| 202 | <a href="#">NM_000640</a>       | <a href="#">Hs.336046</a> | <a href="#">IL13RA2</a>      | Xq23     |
| 203 | <a href="#">NM_000600</a>       | <a href="#">Hs.654458</a> | <a href="#">IL6</a>          | 7p15.3   |
| 204 | <a href="#">NM_000963</a>       | <a href="#">Hs.196384</a> | <a href="#">PTGS2</a>        | 1q31.1   |
| 205 | <a href="#">NM_006528</a>       | <a href="#">Hs.438231</a> | <a href="#">TFPI2</a>        | 7q21.3   |

|     |                              |                           |                              |          |
|-----|------------------------------|---------------------------|------------------------------|----------|
| 206 | <a href="#">NM_000641</a>    | <a href="#">Hs.467304</a> | <a href="#">IL11</a>         | 19q13.42 |
| 207 | <a href="#">NM_000854</a>    | <a href="#">Hs.654462</a> | <a href="#">GSTT2</a>        | 22q11.23 |
| 208 | <a href="#">AA554330</a>     | <a href="#">Hs.600066</a> | <a href="#">AA554330</a>     | 18q21.1  |
| 209 | <a href="#">NM_002200</a>    | <a href="#">Hs.521181</a> | <a href="#">IRF5</a>         | 7q32.1   |
| 210 | <a href="#">U52054</a>       | <a href="#">Hs.561411</a> | <a href="#">U52054</a>       | 1p11.2   |
| 211 | <a href="#">NM_002436</a>    | <a href="#">Hs.496984</a> | <a href="#">MPP1</a>         | Xq28     |
| 212 | <a href="#">NM_006646</a>    | <a href="#">Hs.635221</a> | <a href="#">WASF3</a>        | 13q12.13 |
| 213 | <a href="#">NM_005410</a>    | <a href="#">Hs.275775</a> | <a href="#">SEPP1</a>        | 5p12     |
| 214 | <a href="#">NM_003059</a>    | <a href="#">Hs.310591</a> | <a href="#">SLC22A4</a>      | 5q31.1   |
| 215 | <a href="#">THC2668815</a>   |                           | <a href="#">THC2668815</a>   | 9q34.11  |
| 216 | <a href="#">NM_003462</a>    | <a href="#">Hs.406050</a> | <a href="#">DNALI1</a>       | 1p34.3   |
| 217 | <a href="#">THC2623335</a>   |                           | <a href="#">THC2623335</a>   | 16q12.1  |
| 218 | <a href="#">BC031342</a>     | <a href="#">Hs.445239</a> | <a href="#">BC031342</a>     | 7p15.2   |
| 219 | <a href="#">NM_003063</a>    | <a href="#">Hs.334629</a> | <a href="#">SLN</a>          | 11q22.3  |
| 220 | <a href="#">U10991</a>       | <a href="#">Hs.502266</a> | <a href="#">C11orf41</a>     | 11p13    |
| 221 | <a href="#">BC040542</a>     | <a href="#">Hs.650822</a> | <a href="#">KIAA0802</a>     | 18p11.22 |
| 222 | <a href="#">NM_001013642</a> | <a href="#">Hs.355747</a> | <a href="#">LOC388610</a>    | 1p36.11  |
| 223 | <a href="#">NM_053001</a>    | <a href="#">Hs.253247</a> | <a href="#">OSR2</a>         | 8q22.2   |
| 224 | <a href="#">NM_004282</a>    | <a href="#">Hs.55220</a>  | <a href="#">BAG2</a>         | 6p12.1   |
| 225 | <a href="#">NM_005855</a>    | <a href="#">Hs.471783</a> | <a href="#">RAMP1</a>        | 2q37.3   |
| 226 | <a href="#">NM_002155</a>    | <a href="#">Hs.654614</a> | <a href="#">HSPA6</a>        | 1q23.3   |
| 227 | <a href="#">NM_005345</a>    | <a href="#">Hs.520028</a> | <a href="#">HSPA1A</a>       | 6p21.33  |
| 228 | <a href="#">NM_005527</a>    | <a href="#">Hs.690634</a> | <a href="#">HSPA1L</a>       | 6p21.33  |
| 229 | <a href="#">NM_001174</a>    | <a href="#">Hs.435291</a> | <a href="#">ARHGAP6</a>      | Xp22.2   |
| 230 | <a href="#">NM_053277</a>    | <a href="#">Hs.693698</a> | <a href="#">CLIC6</a>        | 21q22.12 |
| 231 | <a href="#">NM_021012</a>    | <a href="#">Hs.200629</a> | <a href="#">KCNJ12</a>       | 17p11.2  |
| 232 | <a href="#">NM_004962</a>    | <a href="#">Hs.2171</a>   | <a href="#">GDF10</a>        | 10q11.22 |
| 233 | <a href="#">NM_000129</a>    | <a href="#">Hs.335513</a> | <a href="#">F13A1</a>        | 6p25.1   |
| 234 | <a href="#">BX097190</a>     | <a href="#">Hs.7413</a>   | <a href="#">BX097190</a>     | 3q23     |
| 235 | <a href="#">NM_133631</a>    | <a href="#">Hs.13640</a>  | <a href="#">ROBO1</a>        | 3p12.3   |
| 236 | <a href="#">NM_016315</a>    | <a href="#">Hs.470887</a> | <a href="#">GULP1</a>        | 2q32.2   |
| 237 | <a href="#">NM_002091</a>    | <a href="#">Hs.153444</a> | <a href="#">GRP</a>          | 18q21.32 |
| 238 | <a href="#">A_32_P131449</a> |                           | <a href="#">A_32_P131449</a> | 5q33.1   |
| 239 | <a href="#">NM_182943</a>    | <a href="#">Hs.477866</a> | <a href="#">PLOD2</a>        | 3q24     |
| 240 | <a href="#">BC044246</a>     | <a href="#">Hs.591341</a> | <a href="#">KIAA1913</a>     | 6q23.1   |
| 241 | <a href="#">NM_001873</a>    | <a href="#">Hs.75360</a>  | <a href="#">CPE</a>          | 4q32.3   |
| 242 | <a href="#">NM_007029</a>    | <a href="#">Hs.521651</a> | <a href="#">STMN2</a>        | 8q21.13  |
| 243 | <a href="#">S82024</a>       |                           | <a href="#">STMN2</a>        | 8q21.13  |
| 244 | <a href="#">NM_006744</a>    | <a href="#">Hs.50223</a>  | <a href="#">RBP4</a>         | 10q23.33 |
| 245 | <a href="#">AK124396</a>     | <a href="#">Hs.633447</a> | <a href="#">AK124396</a>     | 4q31.22  |
| 246 | <a href="#">BC092429</a>     | <a href="#">Hs.660885</a> | <a href="#">BC092429</a>     | 17p13.1  |
| 247 | <a href="#">NM_183376</a>    | <a href="#">Hs.6093</a>   | <a href="#">ARRDC4</a>       | 15q26.3  |
| 248 | <a href="#">NM_006472</a>    | <a href="#">Hs.533977</a> | <a href="#">TXNIP</a>        | 1q21.1   |
| 249 | <a href="#">NM_006274</a>    | <a href="#">Hs.50002</a>  | <a href="#">CCL19</a>        | 9p13.3   |
| 250 | <a href="#">NM_004867</a>    | <a href="#">Hs.17109</a>  | <a href="#">ITM2A</a>        | Xq21.1   |
| 251 | <a href="#">NM_001928</a>    | <a href="#">Hs.155597</a> | <a href="#">CFD</a>          | 19p13.3  |
| 252 | <a href="#">NM_004167</a>    | <a href="#">Hs.656286</a> | <a href="#">CCL15</a>        | 17q12    |
| 253 | <a href="#">NM_003278</a>    | <a href="#">Hs.476092</a> | <a href="#">CLEC3B</a>       | 3p21.31  |
| 254 | <a href="#">NM_001932</a>    | <a href="#">Hs.396566</a> | <a href="#">MPP3</a>         | 17q21.31 |
| 255 | <a href="#">NM_207380</a>    | <a href="#">Hs.32433</a>  | <a href="#">FLJ43339</a>     | 15q15.1  |
| 256 | <a href="#">NM_003417</a>    | <a href="#">Hs.515634</a> | <a href="#">ZNF264</a>       | 19q13.43 |
| 257 | <a href="#">NM_017870</a>    | <a href="#">Hs.118552</a> | <a href="#">TMEM132A</a>     | 11q12.2  |

|     |                                 |                           |                               |          |
|-----|---------------------------------|---------------------------|-------------------------------|----------|
| 258 | <a href="#">NM_000152</a>       | <a href="#">Hs.1437</a>   | <a href="#">GAA</a>           | 17q25.3  |
| 259 | <a href="#">NM_015326</a>       | <a href="#">Hs.497575</a> | <a href="#">SRGAP2</a>        | 1q32.1   |
| 260 | <a href="#">NM_006885</a>       | <a href="#">Hs.652666</a> | <a href="#">ATBF1</a>         | 16q22.3  |
| 261 | <a href="#">AK129956</a>        | <a href="#">Hs.170131</a> | <a href="#">AK129956</a>      | 19p13.3  |
| 262 | <a href="#">NM_003507</a>       | <a href="#">Hs.173859</a> | <a href="#">FZD7</a>          | 2q33.1   |
| 263 | <a href="#">NM_032780</a>       | <a href="#">Hs.564188</a> | <a href="#">TMEM25</a>        | 11q23.3  |
| 264 | <a href="#">NM_014380</a>       | <a href="#">Hs.448588</a> | <a href="#">NGFRAP1</a>       | Xq22.2   |
| 265 | <a href="#">NM_016269</a>       | <a href="#">Hs.555947</a> | <a href="#">LEF1</a>          | 4q25     |
| 266 | <a href="#">NM_000076</a>       | <a href="#">Hs.106070</a> | <a href="#">CDKN1C</a>        | 11p15.4  |
| 267 | <a href="#">NM_001546</a>       | <a href="#">Hs.519601</a> | <a href="#">ID4</a>           | 6p22.3   |
| 268 | <a href="#">NM_000237</a>       | <a href="#">Hs.180878</a> | <a href="#">LPL</a>           | 8p21.3   |
| 269 | <a href="#">NM_002514</a>       | <a href="#">Hs.235935</a> | <a href="#">NOV</a>           | 8q24.12  |
| 270 | <a href="#">AJ710526</a>        | <a href="#">Hs.595068</a> | <a href="#">AJ710526</a>      | 10q23.33 |
| 271 | <a href="#">NM_016606</a>       | <a href="#">Hs.416090</a> | <a href="#">REEP2</a>         | 5q31.2   |
| 272 | <a href="#">NM_194272</a>       | <a href="#">Hs.436518</a> | <a href="#">RBPMS2</a>        | 15q22.31 |
| 273 | <a href="#">NM_000702</a>       | <a href="#">Hs.34114</a>  | <a href="#">ATP1A2</a>        | 1q23.2   |
| 274 | <a href="#">NM_003248</a>       | <a href="#">Hs.211426</a> | <a href="#">THBS4</a>         | 5q14.1   |
| 275 | <a href="#">NM_000743</a>       | <a href="#">Hs.89605</a>  | <a href="#">CHRNA3</a>        | 15q25.1  |
| 276 | <a href="#">NM_002247</a>       | <a href="#">Hs.144795</a> | <a href="#">KCNMA1</a>        | 10q22.3  |
| 277 | <a href="#">NM_015424</a>       | <a href="#">Hs.432379</a> | <a href="#">CHRDL2</a>        | 11q13.4  |
| 278 | <a href="#">NM_032105</a>       | <a href="#">Hs.444403</a> | <a href="#">PPP1R12B</a>      | 1q32.1   |
| 279 | <a href="#">AL137734</a>        | <a href="#">Hs.437437</a> | <a href="#">DKFZp586C0721</a> | 5q33.1   |
| 280 | <a href="#">NM_004137</a>       | <a href="#">Hs.484099</a> | <a href="#">KCNMB1</a>        | 5q35.1   |
| 281 | <a href="#">AL833294</a>        | <a href="#">Hs.655519</a> | <a href="#">SYNPO2</a>        | 4q26     |
| 282 | <a href="#">NM_001615</a>       | <a href="#">Hs.516105</a> | <a href="#">ACTG2</a>         | 2p13.1   |
| 283 | <a href="#">NM_001299</a>       | <a href="#">Hs.465929</a> | <a href="#">CNN1</a>          | 19p13.2  |
| 284 | <a href="#">NM_053025</a>       | <a href="#">Hs.556600</a> | <a href="#">MYLK</a>          | 3q21.1   |
| 285 | <a href="#">NM_002474</a>       | <a href="#">Hs.460109</a> | <a href="#">MYH11</a>         | 16p13.11 |
| 286 | <a href="#">NM_022844</a>       | <a href="#">Hs.460109</a> | <a href="#">MYH11</a>         | 16p13.11 |
| 287 | <a href="#">NM_001927</a>       | <a href="#">Hs.594952</a> | <a href="#">DES</a>           | 2q35     |
| 288 | <a href="#">NM_145728</a>       | <a href="#">Hs.207106</a> | <a href="#">DMN</a>           | 15q26.3  |
| 289 | <a href="#">NM_203339</a>       | <a href="#">Hs.436657</a> | <a href="#">CLU</a>           | 8p21.1   |
| 290 | <a href="#">NM_022370</a>       | <a href="#">Hs.435621</a> | <a href="#">ROBO3</a>         | 11q24.2  |
| 291 | <a href="#">NM_002145</a>       | <a href="#">Hs.514289</a> | <a href="#">HOXB2</a>         | 17q21.32 |
| 292 | <a href="#">NM_006622</a>       | <a href="#">Hs.398157</a> | <a href="#">PLK2</a>          | 5q11.2   |
| 293 | <a href="#">NM_080927</a>       | <a href="#">Hs.203691</a> | <a href="#">DCBLD2</a>        | 3q12.1   |
| 294 | <a href="#">NM_014945</a>       | <a href="#">Hs.49688</a>  | <a href="#">ABLIM3</a>        | 5q33.1   |
| 295 | <a href="#">NM_018043</a>       | <a href="#">Hs.503074</a> | <a href="#">TMEM16A</a>       | 11q13.3  |
| 296 | <a href="#">NM_031866</a>       | <a href="#">Hs.302634</a> | <a href="#">FZD8</a>          | 10p11.21 |
| 297 | <a href="#">ENST00000367013</a> | <a href="#">Hs.446946</a> | <a href="#">C1orf133</a>      | 1q32.2   |
| 298 | <a href="#">NM_078487</a>       | <a href="#">Hs.72901</a>  | <a href="#">CDKN2B</a>        | 9p21.3   |
| 299 | <a href="#">DB381305</a>        | <a href="#">Hs.629427</a> | <a href="#">DB381305</a>      | 18q21.33 |
| 300 | <a href="#">NM_152852</a>       | <a href="#">Hs.523702</a> | <a href="#">MS4A6A</a>        | 11q12.1  |
| 301 | <a href="#">NM_001080425</a>    | <a href="#">Hs.184736</a> | <a href="#">BEXL1</a>         | Xq22.1   |
| 302 | <a href="#">NM_021939</a>       | <a href="#">Hs.463035</a> | <a href="#">FKBP10</a>        | 17q21.2  |
| 303 | <a href="#">NM_002961</a>       | <a href="#">Hs.654444</a> | <a href="#">S100A4</a>        | 1q21.3   |
| 304 | <a href="#">NM_001423</a>       | <a href="#">Hs.693682</a> | <a href="#">EMP1</a>          | 12p13.1  |
| 305 | <a href="#">NM_000700</a>       | <a href="#">Hs.494173</a> | <a href="#">ANXA1</a>         | 9q21.13  |
| 306 | <a href="#">NM_001008540</a>    | <a href="#">Hs.593413</a> | <a href="#">CXCR4</a>         | 2q21.3   |
| 307 | <a href="#">NM_002922</a>       | <a href="#">Hs.75256</a>  | <a href="#">RGS1</a>          | 1q31.2   |
| 308 | <a href="#">NM_005627</a>       | <a href="#">Hs.510078</a> | <a href="#">SGK</a>           | 6q23.2   |
| 309 | <a href="#">NM_006732</a>       | <a href="#">Hs.590958</a> | <a href="#">FOSB</a>          | 19q13.32 |

|     |                                 |                           |                              |          |
|-----|---------------------------------|---------------------------|------------------------------|----------|
| 310 | <a href="#">NM_002928</a>       | <a href="#">Hs.413297</a> | <a href="#">RGS16</a>        | 1q25.3   |
| 311 | <a href="#">THC2516687</a>      | <a href="#">Hs.8867</a>   | <a href="#">THC2516687</a>   | 1p22.3   |
| 312 | <a href="#">NM_000399</a>       | <a href="#">Hs.1395</a>   | <a href="#">EGR2</a>         | 10q21.2  |
| 313 | <a href="#">NM_001901</a>       | <a href="#">Hs.591346</a> | <a href="#">CTGF</a>         | 6q23.2   |
| 314 | <a href="#">NM_001554</a>       | <a href="#">Hs.8867</a>   | <a href="#">CYR61</a>        | 1p22.3   |
| 315 | <a href="#">NM_001781</a>       | <a href="#">Hs.208854</a> | <a href="#">CD69</a>         | 12p13.31 |
| 316 | <a href="#">NM_004417</a>       | <a href="#">Hs.171695</a> | <a href="#">DUSP1</a>        | 5q35.1   |
| 317 | <a href="#">NM_002923</a>       | <a href="#">Hs.78944</a>  | <a href="#">RGS2</a>         | 1q31.2   |
| 318 | <a href="#">NM_004951</a>       | <a href="#">Hs.784</a>    | <a href="#">EBI2</a>         | 13q32.3  |
| 319 | <a href="#">NM_005261</a>       | <a href="#">Hs.654463</a> | <a href="#">GEM</a>          | 8q22.1   |
| 320 | <a href="#">ENST00000339446</a> | <a href="#">Hs.530443</a> | <a href="#">LOC387763</a>    | 11p11.2  |
| 321 | <a href="#">NM_006988</a>       | <a href="#">Hs.643357</a> | <a href="#">ADAMTS1</a>      | 21q21.3  |
| 322 | <a href="#">NM_173198</a>       | <a href="#">Hs.279522</a> | <a href="#">NR4A3</a>        | 9q31.1   |
| 323 | <a href="#">NM_006108</a>       | <a href="#">Hs.654637</a> | <a href="#">SPON1</a>        | 11p15.2  |
| 324 | <a href="#">NM_001080393</a>    | <a href="#">Hs.431092</a> | <a href="#">GLT8D4</a>       | 3p13     |
| 325 | <a href="#">AW961597</a>        | <a href="#">Hs.675553</a> | <a href="#">AW961597</a>     | 3p13     |
| 326 | <a href="#">THC2515368</a>      |                           | <a href="#">THC2515368</a>   | 3p13     |
| 327 | <a href="#">NM_021020</a>       | <a href="#">Hs.521432</a> | <a href="#">LZTS1</a>        | 8p21.3   |
| 328 | <a href="#">NM_014571</a>       | <a href="#">Hs.472566</a> | <a href="#">HEYL</a>         | 1p34.2   |
| 329 | <a href="#">AK023854</a>        | <a href="#">Hs.526594</a> | <a href="#">OBSL1</a>        | 2q35     |
| 330 | <a href="#">NM_024563</a>       | <a href="#">Hs.13528</a>  | <a href="#">C5orf23</a>      | 5p13.3   |
| 331 | <a href="#">NM_030762</a>       | <a href="#">Hs.177841</a> | <a href="#">BHLHB3</a>       | 12p12.1  |
| 332 | <a href="#">NM_181847</a>       | <a href="#">Hs.121520</a> | <a href="#">AMIGO2</a>       | 12q13.11 |
| 333 | <a href="#">NM_000693</a>       | <a href="#">Hs.459538</a> | <a href="#">ALDH1A3</a>      | 15q26.3  |
| 334 | <a href="#">NM_000014</a>       | <a href="#">Hs.212838</a> | <a href="#">A2M</a>          | 12p13.31 |
| 335 | <a href="#">AL833309</a>        | <a href="#">Hs.622596</a> | <a href="#">AL833309</a>     | 3q26.2   |
| 336 | <a href="#">NM_001003793</a>    | <a href="#">Hs.221436</a> | <a href="#">RBMS3</a>        | 3p24.1   |
| 337 | <a href="#">NM_003277</a>       | <a href="#">Hs.505337</a> | <a href="#">CLDN5</a>        | 22q11.21 |
| 338 | <a href="#">NM_004684</a>       | <a href="#">Hs.62886</a>  | <a href="#">SPARCL1</a>      | 4q22.1   |
| 339 | <a href="#">NM_021219</a>       | <a href="#">Hs.517227</a> | <a href="#">JAM2</a>         | 21q21.3  |
| 340 | <a href="#">NM_021914</a>       | <a href="#">Hs.180141</a> | <a href="#">CFL2</a>         | 14q13.2  |
| 341 | <a href="#">NM_015687</a>       | <a href="#">Hs.526972</a> | <a href="#">FILIP1</a>       | 6q14.1   |
| 342 | <a href="#">NM_032784</a>       | <a href="#">Hs.135254</a> | <a href="#">RSPO3</a>        | 6q22.33  |
| 343 | <a href="#">NM_024769</a>       | <a href="#">Hs.591949</a> | <a href="#">ASAM</a>         | 11q24.1  |
| 344 | <a href="#">AK074473</a>        | <a href="#">Hs.559353</a> | <a href="#">C20orf82</a>     | 20p12.1  |
| 345 | <a href="#">NM_004791</a>       | <a href="#">Hs.584836</a> | <a href="#">ITGBL1</a>       | 13q33.1  |
| 346 | <a href="#">NM_000095</a>       | <a href="#">Hs.1584</a>   | <a href="#">COMP</a>         | 19p13.11 |
| 347 | <a href="#">NM_005940</a>       | <a href="#">Hs.143751</a> | <a href="#">MMP11</a>        | 22q11.23 |
| 348 | <a href="#">NM_003326</a>       | <a href="#">Hs.181097</a> | <a href="#">TNFSF4</a>       | 1q25.1   |
| 349 | <a href="#">NM_000493</a>       | <a href="#">Hs.520339</a> | <a href="#">COL10A1</a>      | 6q22.1   |
| 350 | <a href="#">BF337308</a>        | <a href="#">Hs.619396</a> | <a href="#">BF337308</a>     |          |
| 351 | <a href="#">NM_007021</a>       | <a href="#">Hs.93675</a>  | <a href="#">C10orf10</a>     | 10q11.21 |
| 352 | <a href="#">NM_058229</a>       | <a href="#">Hs.403933</a> | <a href="#">FBXO32</a>       | 8q24.13  |
| 353 | <a href="#">AK023391</a>        | <a href="#">Hs.592775</a> | <a href="#">AK023391</a>     | 8q24.13  |
| 354 | <a href="#">NM_022343</a>       | <a href="#">Hs.493819</a> | <a href="#">C9orf19</a>      | 9p13.3   |
| 355 | <a href="#">A_23_P421323</a>    |                           | <a href="#">A_23_P421323</a> |          |
| 356 | <a href="#">NM_052966</a>       | <a href="#">Hs.518662</a> | <a href="#">FAM129A</a>      | 1q25.3   |
| 357 | <a href="#">NM_005909</a>       | <a href="#">Hs.584777</a> | <a href="#">MAP1B</a>        | 5q13.2   |
| 358 | <a href="#">AK055112</a>        | <a href="#">Hs.637017</a> | <a href="#">AK055112</a>     | 5q13.2   |
| 359 | <a href="#">NM_015833</a>       | <a href="#">Hs.474018</a> | <a href="#">ADARB1</a>       | 21q22.3  |
| 360 | <a href="#">NM_015103</a>       | <a href="#">Hs.301685</a> | <a href="#">PLXND1</a>       | 3q21.3   |
| 361 | <a href="#">NM_003062</a>       | <a href="#">Hs.604116</a> | <a href="#">SLIT3</a>        | 5q35.1   |

|     |                                 |                           |                                 |          |
|-----|---------------------------------|---------------------------|---------------------------------|----------|
| 362 | <a href="#">NM_000609</a>       | <a href="#">Hs.522891</a> | <a href="#">CXCL12</a>          | 10q11.21 |
| 363 | <a href="#">NM_012261</a>       | <a href="#">Hs.22920</a>  | <a href="#">C20orf103</a>       | 20p12.2  |
| 364 | <a href="#">NM_173653</a>       | <a href="#">Hs.302257</a> | <a href="#">SLC9A9</a>          | 3q24     |
| 365 | <a href="#">NM_024692</a>       | <a href="#">Hs.122927</a> | <a href="#">CLIP4</a>           | 2p23.2   |
| 366 | <a href="#">NM_199072</a>       | <a href="#">Hs.427236</a> | <a href="#">MDFIC</a>           | 7q31.2   |
| 367 | <a href="#">NM_002113</a>       | <a href="#">Hs.363396</a> | <a href="#">CFHR1</a>           | 1q31.3   |
| 368 | <a href="#">NM_021023</a>       | <a href="#">Hs.575869</a> | <a href="#">CFHR3</a>           | 1q31.3   |
| 369 | <a href="#">NM_001014975</a>    | <a href="#">Hs.363396</a> | <a href="#">CFH</a>             | 1q31.3   |
| 370 | <a href="#">NM_003881</a>       | <a href="#">Hs.592145</a> | <a href="#">WISP2</a>           | 20q13.12 |
| 371 | <a href="#">NM_000618</a>       | <a href="#">Hs.160562</a> | <a href="#">IGF1</a>            | 12q23.2  |
| 372 | <a href="#">W60781</a>          | <a href="#">Hs.391561</a> | <a href="#">W60781</a>          | 8q21.13  |
| 373 | <a href="#">ENST00000372045</a> | <a href="#">Hs.496587</a> | <a href="#">ENST00000372045</a> | Xq22.3   |
| 374 | <a href="#">A_32_P210193</a>    |                           | <a href="#">A_32_P210193</a>    | 12p12.3  |
| 375 | <a href="#">NM_003613</a>       | <a href="#">Hs.442180</a> | <a href="#">CILP</a>            | 15q22.31 |
| 376 | <a href="#">NM_000900</a>       | <a href="#">Hs.365706</a> | <a href="#">MGP</a>             | 12p12.3  |
| 377 | <a href="#">NM_000961</a>       | <a href="#">Hs.302085</a> | <a href="#">PTGIS</a>           | 20q13.13 |
| 378 | <a href="#">AK055387</a>        | <a href="#">Hs.21639</a>  | <a href="#">SPEG</a>            | 2q35     |
| 379 | <a href="#">NM_002667</a>       | <a href="#">Hs.170839</a> | <a href="#">PLN</a>             | 6q22.31  |
| 380 | <a href="#">AK129844</a>        | <a href="#">Hs.170839</a> | <a href="#">PLN</a>             | 6q22.31  |
| 381 | <a href="#">NM_145056</a>       | <a href="#">Hs.515490</a> | <a href="#">DACT3</a>           | 19q13.32 |
| 382 | <a href="#">AI042308</a>        | <a href="#">Hs.666842</a> | <a href="#">AI042308</a>        | 11q23.3  |
| 383 | <a href="#">NM_213674</a>       | <a href="#">Hs.300772</a> | <a href="#">TPM2</a>            | 9p13.3   |
| 384 | <a href="#">NM_003734</a>       | <a href="#">Hs.198241</a> | <a href="#">AOC3</a>            | 17q21.31 |
| 385 | <a href="#">NM_181526</a>       | <a href="#">Hs.504687</a> | <a href="#">MYL9</a>            | 20q11.23 |
| 386 | <a href="#">NM_001613</a>       | <a href="#">Hs.500483</a> | <a href="#">ACTA2</a>           | 10q23.31 |
| 387 | <a href="#">NM_001001522</a>    | <a href="#">Hs.632099</a> | <a href="#">TAGLN</a>           | 11q23.3  |
| 388 | <a href="#">NM_004787</a>       | <a href="#">Hs.29802</a>  | <a href="#">SLIT2</a>           | 4p15.31  |
| 389 | <a href="#">AW268902</a>        | <a href="#">Hs.29802</a>  | <a href="#">AW268902</a>        | 4p15.31  |
| 390 | <a href="#">NM_198148</a>       | <a href="#">Hs.656887</a> | <a href="#">CPXM2</a>           | 10q26.13 |
| 391 | <a href="#">NM_002048</a>       | <a href="#">Hs.65029</a>  | <a href="#">GAS1</a>            | 9q21.33  |
| 392 | <a href="#">NM_199168</a>       | <a href="#">Hs.522891</a> | <a href="#">CXCL12</a>          | 10q11.21 |
| 393 | <a href="#">NM_003480</a>       | <a href="#">Hs.512842</a> | <a href="#">MFAP5</a>           | 12p13.31 |
| 394 | <a href="#">NM_000104</a>       | <a href="#">Hs.154654</a> | <a href="#">CYP1B1</a>          | 2p22.2   |
| 395 | <a href="#">NM_003013</a>       | <a href="#">Hs.481022</a> | <a href="#">SFRP2</a>           | 4q31.3   |
| 396 | <a href="#">NM_003239</a>       | <a href="#">Hs.592317</a> | <a href="#">TGFB3</a>           | 14q24.3  |
| 397 | <a href="#">BE835321</a>        | <a href="#">Hs.592317</a> | <a href="#">BE835321</a>        | 14q24.3  |
| 398 | <a href="#">NM_199511</a>       | <a href="#">Hs.477128</a> | <a href="#">CCDC80</a>          | 3q13.2   |
| 399 | <a href="#">NM_006207</a>       | <a href="#">Hs.458573</a> | <a href="#">PDGFRL</a>          | 8p22     |
| 400 | <a href="#">NM_003485</a>       | <a href="#">Hs.8882</a>   | <a href="#">GPR68</a>           | 14q32.12 |
| 401 | <a href="#">NM_001039580</a>    | <a href="#">Hs.61271</a>  | <a href="#">MAP9</a>            | 4q32.1   |
| 402 | <a href="#">NM_002023</a>       | <a href="#">Hs.519168</a> | <a href="#">FMOD</a>            | 1q32.1   |
| 403 | <a href="#">NM_206943</a>       | <a href="#">Hs.654497</a> | <a href="#">LTBP1</a>           | 2p22.3   |
| 404 | <a href="#">AL049443</a>        | <a href="#">Hs.660870</a> | <a href="#">AL049443</a>        | 2p16.3   |
| 405 | <a href="#">NM_000064</a>       | <a href="#">Hs.529053</a> | <a href="#">C3</a>              | 19p13.3  |
| 406 | <a href="#">A_24_P561165</a>    |                           | <a href="#">A_24_P561165</a>    | 11q12.1  |
| 407 | <a href="#">NM_005099</a>       | <a href="#">Hs.211604</a> | <a href="#">ADAMTS4</a>         | 1q23.3   |
| 408 | <a href="#">NM_212482</a>       | <a href="#">Hs.203717</a> | <a href="#">FN1</a>             | 2q35     |
| 409 | <a href="#">NM_170744</a>       | <a href="#">Hs.585457</a> | <a href="#">UNC5B</a>           | 10q22.1  |
| 410 | <a href="#">NM_001001396</a>    | <a href="#">Hs.343522</a> | <a href="#">ATP2B4</a>          | 1q32.1   |
| 411 | <a href="#">AK024680</a>        | <a href="#">Hs.660596</a> | <a href="#">AK024680</a>        | 2q33.3   |
| 412 | <a href="#">NM_004370</a>       | <a href="#">Hs.101302</a> | <a href="#">COL12A1</a>         | 6q13     |
| 413 | <a href="#">NM_138440</a>       | <a href="#">Hs.372579</a> | <a href="#">VASN</a>            | 16p13.3  |

|     |                                 |                           |                            |          |
|-----|---------------------------------|---------------------------|----------------------------|----------|
| 414 | <a href="#">NM_012445</a>       | <a href="#">Hs.302963</a> | <a href="#">SPON2</a>      | 4p16.3   |
| 415 | <a href="#">NM_007361</a>       | <a href="#">Hs.369840</a> | <a href="#">NID2</a>       | 14q22.1  |
| 416 | <a href="#">AB058761</a>        | <a href="#">Hs.54925</a>  | <a href="#">ZNF469</a>     | 16q24.2  |
| 417 | <a href="#">NM_001849</a>       | <a href="#">Hs.420269</a> | <a href="#">COL6A2</a>     | 21q22.3  |
| 418 | <a href="#">NM_001848</a>       | <a href="#">Hs.474053</a> | <a href="#">COL6A1</a>     | 21q22.3  |
| 419 | <a href="#">Z74615</a>          | <a href="#">Hs.172928</a> | <a href="#">COL1A1</a>     | 17q21.33 |
| 420 | <a href="#">NM_002609</a>       | <a href="#">Hs.509067</a> | <a href="#">PDGFRB</a>     | 5q33.1   |
| 421 | <a href="#">NM_001846</a>       | <a href="#">Hs.508716</a> | <a href="#">COL4A2</a>     | 13q34    |
| 422 | <a href="#">AW138903</a>        | <a href="#">Hs.8546</a>   | <a href="#">AW138903</a>   | 19p13.12 |
| 423 | <a href="#">BX427588</a>        | <a href="#">Hs.669724</a> | <a href="#">BX427588</a>   | 7q21.3   |
| 424 | <a href="#">NM_002889</a>       | <a href="#">Hs.647064</a> | <a href="#">RARRES2</a>    | 7q36.1   |
| 425 | <a href="#">NM_013372</a>       | <a href="#">Hs.40098</a>  | <a href="#">GREM1</a>      | 15q13.3  |
| 426 | <a href="#">BC039414</a>        | <a href="#">Hs.655414</a> | <a href="#">BC039414</a>   | 4q32.1   |
| 427 | <a href="#">NM_002404</a>       | <a href="#">Hs.296049</a> | <a href="#">MFAP4</a>      | 17p11.2  |
| 428 | <a href="#">NM_005269</a>       | <a href="#">Hs.632702</a> | <a href="#">GLI1</a>       | 12q13.3  |
| 429 | <a href="#">NM_004349</a>       | <a href="#">Hs.368431</a> | <a href="#">RUNX1T1</a>    | 8q21.3   |
| 430 | <a href="#">ENST00000377047</a> | <a href="#">Hs.444329</a> | <a href="#">GPC6</a>       | 13q32.1  |
| 431 | <a href="#">NM_006486</a>       | <a href="#">Hs.24601</a>  | <a href="#">FBLN1</a>      | 22q13.31 |
| 432 | <a href="#">NM_001734</a>       | <a href="#">Hs.458355</a> | <a href="#">C1S</a>        | 12p13.31 |
| 433 | <a href="#">NM_004598</a>       | <a href="#">Hs.654695</a> | <a href="#">SPOCK1</a>     | 5q31.2   |
| 434 | <a href="#">NM_181435</a>       | <a href="#">Hs.171929</a> | <a href="#">C1QTNF3</a>    | 5p13.3   |
| 435 | <a href="#">BC020879</a>        | <a href="#">Hs.664877</a> | <a href="#">MGC24103</a>   | 9p22.3   |
| 436 | <a href="#">NR_002766</a>       | <a href="#">Hs.525589</a> | <a href="#">MEG3</a>       | 14q32.2  |
| 437 | <a href="#">NM_014476</a>       | <a href="#">Hs.85862</a>  | <a href="#">PDLIM3</a>     | 4q35.1   |
| 438 | <a href="#">NM_005086</a>       | <a href="#">Hs.183428</a> | <a href="#">SSPN</a>       | 12p12.1  |
| 439 | <a href="#">NM_004105</a>       | <a href="#">Hs.76224</a>  | <a href="#">EFEMP1</a>     | 2p16.1   |
| 440 | <a href="#">NM_153026</a>       | <a href="#">Hs.524348</a> | <a href="#">PRICKLE1</a>   | 12q12    |
| 441 | <a href="#">NM_006873</a>       | <a href="#">Hs.44385</a>  | <a href="#">STON1</a>      | 2p16.3   |
| 442 | <a href="#">AK095791</a>        | <a href="#">Hs.411391</a> | <a href="#">AK095791</a>   | 11q24.1  |
| 443 | <a href="#">NM_001856</a>       | <a href="#">Hs.368921</a> | <a href="#">COL16A1</a>    | 1p35.2   |
| 444 | <a href="#">NM_016651</a>       | <a href="#">Hs.48950</a>  | <a href="#">DACT1</a>      | 14q23.1  |
| 445 | <a href="#">NM_002192</a>       | <a href="#">Hs.583348</a> | <a href="#">INHBA</a>      | 7p14.1   |
| 446 | <a href="#">NM_014112</a>       | <a href="#">Hs.657018</a> | <a href="#">TRPS1</a>      | 8q23.3   |
| 447 | <a href="#">NM_032812</a>       | <a href="#">Hs.658134</a> | <a href="#">PLXDC2</a>     | 10p12.31 |
| 448 | <a href="#">NM_130386</a>       | <a href="#">Hs.464422</a> | <a href="#">COLEC12</a>    | 18p11.32 |
| 449 | <a href="#">NM_053044</a>       | <a href="#">Hs.479119</a> | <a href="#">HTRA3</a>      | 4p16.1   |
| 450 | <a href="#">NM_001004019</a>    | <a href="#">Hs.198862</a> | <a href="#">FBLN2</a>      | 3p25.1   |
| 451 | <a href="#">NM_024893</a>       | <a href="#">Hs.124638</a> | <a href="#">C20orf39</a>   | 20p11.21 |
| 452 | <a href="#">NM_000362</a>       | <a href="#">Hs.644633</a> | <a href="#">TIMP3</a>      | 22q12.3  |
| 453 | <a href="#">NM_002615</a>       | <a href="#">Hs.532768</a> | <a href="#">SERPINF1</a>   | 17p13.3  |
| 454 | <a href="#">NM_005576</a>       | <a href="#">Hs.65436</a>  | <a href="#">LOXL1</a>      | 15q24.1  |
| 455 | <a href="#">NM_144601</a>       | <a href="#">Hs.298198</a> | <a href="#">CMTM3</a>      | 16q22.1  |
| 456 | <a href="#">NM_003380</a>       | <a href="#">Hs.642813</a> | <a href="#">VIM</a>        | 10p12.33 |
| 457 | <a href="#">THC2574606</a>      |                           | <a href="#">THC2574606</a> | 10p12.33 |
| 458 | <a href="#">NM_020856</a>       | <a href="#">Hs.278436</a> | <a href="#">TSHZ3</a>      | 19q12    |
| 459 | <a href="#">ENST00000375377</a> | <a href="#">Hs.533953</a> | <a href="#">KIAA1462</a>   | 10p11.23 |
| 460 | <a href="#">NM_012232</a>       | <a href="#">Hs.437191</a> | <a href="#">PTRF</a>       | 17q21.31 |
| 461 | <a href="#">NM_007085</a>       | <a href="#">Hs.269512</a> | <a href="#">FSTL1</a>      | 3q13.33  |
| 462 | <a href="#">NM_033138</a>       | <a href="#">Hs.490203</a> | <a href="#">CALD1</a>      | 7q33     |
| 463 | <a href="#">NM_000393</a>       | <a href="#">Hs.445827</a> | <a href="#">COL5A2</a>     | 2q32.2   |
| 464 | <a href="#">NM_000138</a>       | <a href="#">Hs.591133</a> | <a href="#">FBN1</a>       | 15q21.1  |
| 465 | <a href="#">NM_000089</a>       | <a href="#">Hs.489142</a> | <a href="#">COL1A2</a>     | 7q21.3   |

|     |                              |                           |                          |          |
|-----|------------------------------|---------------------------|--------------------------|----------|
| 466 | <a href="#">NM_000090</a>    | <a href="#">Hs.443625</a> | <a href="#">COL3A1</a>   | 2q32.2   |
| 467 | <a href="#">NM_003118</a>    | <a href="#">Hs.111779</a> | <a href="#">SPARC</a>    | 5q33.1   |
| 468 | <a href="#">NM_006169</a>    | <a href="#">Hs.503911</a> | <a href="#">NNMT</a>     | 11q23.2  |
| 469 | <a href="#">NM_005110</a>    | <a href="#">Hs.30332</a>  | <a href="#">GFPT2</a>    | 5q35.3   |
| 470 | <a href="#">NM_016205</a>    | <a href="#">Hs.570855</a> | <a href="#">PDGFC</a>    | 4q32.1   |
| 471 | <a href="#">NM_002775</a>    | <a href="#">Hs.501280</a> | <a href="#">HTRA1</a>    | 10q26.13 |
| 472 | <a href="#">NM_023110</a>    | <a href="#">Hs.264887</a> | <a href="#">FGFR1</a>    | 8p12     |
| 473 | <a href="#">NM_000168</a>    | <a href="#">Hs.21509</a>  | <a href="#">GLI3</a>     | 7p14.1   |
| 474 | <a href="#">NM_001129</a>    | <a href="#">Hs.439463</a> | <a href="#">AEBP1</a>    | 7p13     |
| 475 | <a href="#">NM_003014</a>    | <a href="#">Hs.658169</a> | <a href="#">SFRP4</a>    | 7p14.1   |
| 476 | <a href="#">NM_005202</a>    | <a href="#">Hs.353001</a> | <a href="#">COL8A2</a>   | 1p34.3   |
| 477 | <a href="#">NM_001850</a>    | <a href="#">Hs.654548</a> | <a href="#">COL8A1</a>   | 3q12.1   |
| 478 | <a href="#">AL359062</a>     | <a href="#">Hs.134830</a> | <a href="#">AL359062</a> | 3q12.1   |
| 479 | <a href="#">NM_015170</a>    | <a href="#">Hs.409602</a> | <a href="#">SULF1</a>    | 8q13.3   |
| 480 | <a href="#">L12350</a>       | <a href="#">Hs.371147</a> | <a href="#">THBS2</a>    | 6q27     |
| 481 | <a href="#">NM_032532</a>    | <a href="#">Hs.520525</a> | <a href="#">FNDC1</a>    | 6q25.3   |
| 482 | <a href="#">NM_001797</a>    | <a href="#">Hs.116471</a> | <a href="#">CDH11</a>    | 16q21    |
| 483 | <a href="#">NM_032208</a>    | <a href="#">Hs.165859</a> | <a href="#">ANTXR1</a>   | 2p14     |
| 484 | <a href="#">NM_005504</a>    | <a href="#">Hs.438993</a> | <a href="#">BCAT1</a>    | 12p12.1  |
| 485 | <a href="#">NM_006475</a>    | <a href="#">Hs.136348</a> | <a href="#">POSTN</a>    | 13q13.3  |
| 486 | <a href="#">NM_006868</a>    | <a href="#">Hs.99528</a>  | <a href="#">RAB31</a>    | 18p11.22 |
| 487 | <a href="#">NM_138455</a>    | <a href="#">Hs.405614</a> | <a href="#">CTHRC1</a>   | 8q22.3   |
| 488 | <a href="#">NM_004460</a>    | <a href="#">Hs.654370</a> | <a href="#">FAP</a>      | 2q24.2   |
| 489 | <a href="#">NM_017680</a>    | <a href="#">Hs.435655</a> | <a href="#">ASPN</a>     | 9q22.31  |
| 490 | <a href="#">NM_000396</a>    | <a href="#">Hs.632466</a> | <a href="#">CTSK</a>     | 1q21.2   |
| 491 | <a href="#">NM_001920</a>    | <a href="#">Hs.156316</a> | <a href="#">DCN</a>      | 12q21.33 |
| 492 | <a href="#">NM_002345</a>    | <a href="#">Hs.406475</a> | <a href="#">LUM</a>      | 12q21.33 |
| 493 | <a href="#">NM_152330</a>    | <a href="#">Hs.434914</a> | <a href="#">FRMD6</a>    | 14q22.1  |
| 494 | <a href="#">NM_003596</a>    | <a href="#">Hs.421194</a> | <a href="#">TPST1</a>    | 7q11.21  |
| 495 | <a href="#">NM_016206</a>    | <a href="#">Hs.435013</a> | <a href="#">VGLL3</a>    | 3p12.1   |
| 496 | <a href="#">NM_030786</a>    | <a href="#">Hs.655938</a> | <a href="#">SYNC1</a>    | 1p35.1   |
| 497 | <a href="#">BM999343</a>     | <a href="#">Hs.99528</a>  | <a href="#">BM999343</a> | 18p11.22 |
| 498 | <a href="#">NM_004530</a>    | <a href="#">Hs.513617</a> | <a href="#">MMP2</a>     | 16q12.2  |
| 499 | <a href="#">NM_003247</a>    | <a href="#">Hs.371147</a> | <a href="#">THBS2</a>    | 6q27     |
| 500 | <a href="#">NM_001030059</a> | <a href="#">Hs.40479</a>  | <a href="#">PPAPDC1A</a> | 10q26.12 |
| 501 | <a href="#">NM_004403</a>    | <a href="#">Hs.520708</a> | <a href="#">DFNA5</a>    | 7p15.3   |
| 502 | <a href="#">NM_018004</a>    | <a href="#">Hs.658956</a> | <a href="#">TMEM45A</a>  | 3q12.2   |
| 503 | <a href="#">NM_003254</a>    | <a href="#">Hs.522632</a> | <a href="#">TIMP1</a>    | Xp11.23  |
| 504 | <a href="#">NM_014583</a>    | <a href="#">Hs.475353</a> | <a href="#">LMCD1</a>    | 3p26.1   |
| 505 | <a href="#">NM_032849</a>    | <a href="#">Hs.646647</a> | <a href="#">C13orf33</a> | 13q12.3  |
| 506 | <a href="#">AY098593</a>     | <a href="#">Hs.439341</a> | <a href="#">KGFLP1</a>   | 9p11.2   |
| 507 | <a href="#">NM_004995</a>    | <a href="#">Hs.2399</a>   | <a href="#">MMP14</a>    | 14q11.2  |
| 508 | <a href="#">NM_178234</a>    | <a href="#">Hs.591845</a> | <a href="#">TUSC3</a>    | 8p22     |
| 509 | <a href="#">NM_006832</a>    | <a href="#">Hs.509343</a> | <a href="#">PLEKHC1</a>  | 14q22.2  |
| 510 | <a href="#">NM_000165</a>    | <a href="#">Hs.74471</a>  | <a href="#">GJA1</a>     | 6q22.31  |
| 511 | <a href="#">AF200348</a>     | <a href="#">Hs.332197</a> | <a href="#">PXDN</a>     | 2p25.3   |
| 512 | <a href="#">NM_016307</a>    | <a href="#">Hs.660115</a> | <a href="#">PRRX2</a>    | 9q34.11  |
| 513 | <a href="#">AW276332</a>     | <a href="#">Hs.406475</a> | <a href="#">AW276332</a> | 12q21.33 |
| 514 | <a href="#">NM_002998</a>    | <a href="#">Hs.1501</a>   | <a href="#">SDC2</a>     | 8q22.1   |
| 515 | <a href="#">AK022110</a>     | <a href="#">Hs.289044</a> | <a href="#">AK022110</a> | 5q11.2   |
| 516 | <a href="#">NM_031442</a>    | <a href="#">Hs.8769</a>   | <a href="#">TMEM47</a>   | Xp21.1   |
| 517 | <a href="#">NM_018357</a>    | <a href="#">Hs.416755</a> | <a href="#">LARP6</a>    | 15q23    |

|     |                                 |                           |                              |          |
|-----|---------------------------------|---------------------------|------------------------------|----------|
| 518 | <a href="#">NM_005725</a>       | <a href="#">Hs.310458</a> | <a href="#">TSPAN2</a>       | 1p13.2   |
| 519 | <a href="#">NM_001033564</a>    | <a href="#">Hs.591340</a> | <a href="#">LOC619208</a>    | 6q21     |
| 520 | <a href="#">NM_005711</a>       | <a href="#">Hs.482730</a> | <a href="#">EDIL3</a>        | 5q14.3   |
| 521 | <a href="#">NM_004348</a>       | <a href="#">Hs.535845</a> | <a href="#">RUNX2</a>        | 6p12.3   |
| 522 | <a href="#">NM_013409</a>       | <a href="#">Hs.9914</a>   | <a href="#">FST</a>          | 5q11.2   |
| 523 | <a href="#">NM_016613</a>       | <a href="#">Hs.567498</a> | <a href="#">C4orf18</a>      | 4q32.1   |
| 524 | <a href="#">AK025997</a>        | <a href="#">Hs.655087</a> | <a href="#">MCTP1</a>        | 5q15     |
| 525 | <a href="#">NM_000565</a>       | <a href="#">Hs.591492</a> | <a href="#">IL6R</a>         | 1q21.3   |
| 526 | <a href="#">AB002384</a>        | <a href="#">Hs.559459</a> | <a href="#">C6orf32</a>      | 6p22.2   |
| 527 | <a href="#">NM_021615</a>       | <a href="#">Hs.655622</a> | <a href="#">CHST6</a>        | 16q23.1  |
| 528 | <a href="#">NM_015184</a>       | <a href="#">Hs.202010</a> | <a href="#">PLCL2</a>        | 3p24.3   |
| 529 | <a href="#">NM_001874</a>       | <a href="#">Hs.654387</a> | <a href="#">CPM</a>          | 12q15    |
| 530 | <a href="#">NM_005949</a>       | <a href="#">Hs.513626</a> | <a href="#">MT1F</a>         | 16q13    |
| 531 | <a href="#">NM_176870</a>       | <a href="#">Hs.647370</a> | <a href="#">MT1M</a>         | 16q13    |
| 532 | <a href="#">NM_005953</a>       | <a href="#">Hs.647371</a> | <a href="#">MT2A</a>         | 16q13    |
| 533 | <a href="#">ENST00000245185</a> | <a href="#">Hs.647371</a> | <a href="#">MT2A</a>         | 16q13    |
| 534 | <a href="#">NM_005951</a>       | <a href="#">Hs.438462</a> | <a href="#">MT1H</a>         | 16q13    |
| 535 | <a href="#">NM_175617</a>       | <a href="#">Hs.534330</a> | <a href="#">MT1E</a>         | 16q13    |
| 536 | <a href="#">NM_005952</a>       | <a href="#">Hs.374950</a> | <a href="#">MT1X</a>         | 16q13    |
| 537 | <a href="#">X97261</a>          | <a href="#">Hs.647358</a> | <a href="#">MT1L</a>         | 16q13    |
| 538 | <a href="#">NM_005950</a>       | <a href="#">Hs.433391</a> | <a href="#">MT1G</a>         | 16q13    |
| 539 | <a href="#">NM_005947</a>       | <a href="#">Hs.656629</a> | <a href="#">MT1B</a>         | 16q13    |
| 540 | <a href="#">NM_000450</a>       | <a href="#">Hs.89546</a>  | <a href="#">SELE</a>         | 1q24.2   |
| 541 | <a href="#">NM_000552</a>       | <a href="#">Hs.440848</a> | <a href="#">VWF</a>          | 12p13.31 |
| 542 | <a href="#">NM_005282</a>       | <a href="#">Hs.17170</a>  | <a href="#">GPR4</a>         | 19q13.32 |
| 543 | <a href="#">NM_018371</a>       | <a href="#">Hs.655166</a> | <a href="#">ChGn</a>         | 8p21.3   |
| 544 | <a href="#">NM_170736</a>       | <a href="#">Hs.411299</a> | <a href="#">KCNJ15</a>       | 21q22.13 |
| 545 | <a href="#">AA593970</a>        | <a href="#">Hs.608251</a> | <a href="#">AA593970</a>     | 2p14     |
| 546 | <a href="#">NM_001124</a>       | <a href="#">Hs.441047</a> | <a href="#">ADM</a>          | 11p15.4  |
| 547 | <a href="#">NM_139314</a>       | <a href="#">Hs.9613</a>   | <a href="#">ANGPTL4</a>      | 19p13.2  |
| 548 | <a href="#">A_23_P170719</a>    |                           | <a href="#">A_23_P170719</a> | 19p13.2  |
| 549 | <a href="#">NM_001109</a>       | <a href="#">Hs.501574</a> | <a href="#">ADAM8</a>        | 10q26.3  |
| 550 | <a href="#">NM_138931</a>       | <a href="#">Hs.478588</a> | <a href="#">BCL6</a>         | 3q27.3   |
| 551 | <a href="#">A_23_P123234</a>    |                           | <a href="#">A_23_P123234</a> | 7q22.1   |
| 552 | <a href="#">BC060766</a>        | <a href="#">Hs.655169</a> | <a href="#">SLC2A14</a>      | 12p13.31 |
| 553 | <a href="#">NM_000201</a>       | <a href="#">Hs.643447</a> | <a href="#">ICAM1</a>        | 19p13.2  |
| 554 | <a href="#">NM_006291</a>       | <a href="#">Hs.525607</a> | <a href="#">TNFAIP2</a>      | 14q32.32 |
| 555 | <a href="#">NM_002133</a>       | <a href="#">Hs.517581</a> | <a href="#">HMOX1</a>        | 22q12.3  |
| 556 | <a href="#">NM_145699</a>       | <a href="#">Hs.348983</a> | <a href="#">APOBEC3A</a>     | 22q13.1  |
| 557 | <a href="#">NM_173842</a>       | <a href="#">Hs.81134</a>  | <a href="#">IL1RN</a>        | 2q13     |
| 558 | <a href="#">NM_006018</a>       | <a href="#">Hs.458425</a> | <a href="#">GPR109B</a>      | 12q24.31 |
| 559 | <a href="#">NM_021935</a>       | <a href="#">Hs.528665</a> | <a href="#">PROK2</a>        | 3p13     |
| 560 | <a href="#">NM_000576</a>       | <a href="#">Hs.126256</a> | <a href="#">IL1B</a>         | 2q13     |
| 561 | <a href="#">NM_000584</a>       | <a href="#">Hs.624</a>    | <a href="#">IL8</a>          | 4q13.3   |
| 562 | <a href="#">NM_007115</a>       | <a href="#">Hs.437322</a> | <a href="#">TNFAIP6</a>      | 2q23.3   |
| 563 | <a href="#">NM_018643</a>       | <a href="#">Hs.283022</a> | <a href="#">TREM1</a>        | 6p21.1   |
| 564 | <a href="#">NM_002984</a>       | <a href="#">Hs.75703</a>  | <a href="#">CCL4</a>         | 17q12    |
| 565 | <a href="#">D00044</a>          | <a href="#">Hs.514107</a> | <a href="#">CCL3</a>         | 17q12    |
| 566 | <a href="#">NM_003955</a>       | <a href="#">Hs.527973</a> | <a href="#">SOCS3</a>        | 17q25.3  |
| 567 | <a href="#">NM_020530</a>       | <a href="#">Hs.248156</a> | <a href="#">OSM</a>          | 22q12.2  |
| 568 | <a href="#">NM_015714</a>       | <a href="#">Hs.432132</a> | <a href="#">G0S2</a>         | 1q32.2   |
| 569 | <a href="#">NM_000636</a>       | <a href="#">Hs.487046</a> | <a href="#">SOD2</a>         | 6q25.3   |

|     |                              |                           |                            |          |
|-----|------------------------------|---------------------------|----------------------------|----------|
| 570 | <a href="#">NM_002965</a>    | <a href="#">Hs.112405</a> | <a href="#">S100A9</a>     | 1q21.3   |
| 571 | <a href="#">NM_002432</a>    | <a href="#">Hs.153837</a> | <a href="#">MNDA</a>       | 1q23.1   |
| 572 | <a href="#">NM_016184</a>    | <a href="#">Hs.504657</a> | <a href="#">CLEC4A</a>     | 12p13.31 |
| 573 | <a href="#">NM_014358</a>    | <a href="#">Hs.236516</a> | <a href="#">CLEC4E</a>     | 12p13.31 |
| 574 | <a href="#">NM_002664</a>    | <a href="#">Hs.468840</a> | <a href="#">PLEK</a>       | 2p14     |
| 575 | <a href="#">NM_005565</a>    | <a href="#">Hs.304475</a> | <a href="#">LCP2</a>       | 5q35.1   |
| 576 | <a href="#">NM_000433</a>    | <a href="#">Hs.587558</a> | <a href="#">NCF2</a>       | 1q25.3   |
| 577 | <a href="#">NM_006864</a>    | <a href="#">Hs.631592</a> | <a href="#">LILRB3</a>     | 19q13.42 |
| 578 | <a href="#">NM_020980</a>    | <a href="#">Hs.104624</a> | <a href="#">AQP9</a>       | 15q22.1  |
| 579 | <a href="#">NM_002727</a>    | <a href="#">Hs.1908</a>   | <a href="#">SRGN</a>       | 10q21.3  |
| 580 | <a href="#">NM_004049</a>    | <a href="#">Hs.227817</a> | <a href="#">BCL2A1</a>     | 15q25.1  |
| 581 | <a href="#">NM_002029</a>    | <a href="#">Hs.753</a>    | <a href="#">FPR1</a>       | 19q13.33 |
| 582 | <a href="#">NM_002964</a>    | <a href="#">Hs.416073</a> | <a href="#">S100A8</a>     | 1q21.3   |
| 583 | <a href="#">NM_002852</a>    | <a href="#">Hs.591286</a> | <a href="#">PTX3</a>       | 3q25.32  |
| 584 | <a href="#">NM_001001547</a> | <a href="#">Hs.120949</a> | <a href="#">CD36</a>       | 7q21.11  |
| 585 | <a href="#">NM_052960</a>    | <a href="#">Hs.422688</a> | <a href="#">RBP7</a>       | 1p36.22  |
| 586 | <a href="#">NM_005623</a>    | <a href="#">Hs.271387</a> | <a href="#">CCL8</a>       | 17q12    |
| 587 | <a href="#">NM_181755</a>    | <a href="#">Hs.195040</a> | <a href="#">HSD11B1</a>    | 1q32.2   |
| 588 | <a href="#">NM_002982</a>    | <a href="#">Hs.303649</a> | <a href="#">CCL2</a>       | 17q12    |
| 589 | <a href="#">NM_182566</a>    | <a href="#">Hs.122561</a> | <a href="#">VMO1</a>       | 17p13.2  |
| 590 | <a href="#">NM_004994</a>    | <a href="#">Hs.297413</a> | <a href="#">MMP9</a>       | 20q13.12 |
| 591 | <a href="#">NM_006770</a>    | <a href="#">Hs.67726</a>  | <a href="#">MARCO</a>      | 2q14.2   |
| 592 | <a href="#">NM_000582</a>    | <a href="#">Hs.313</a>    | <a href="#">SPP1</a>       | 4q22.1   |
| 593 | <a href="#">NM_024508</a>    | <a href="#">Hs.136912</a> | <a href="#">ZBED2</a>      | 3q13.13  |
| 594 | <a href="#">L34088</a>       | <a href="#">Hs.387679</a> | <a href="#">HLA-DQA1</a>   |          |
| 595 | <a href="#">NM_020056</a>    | <a href="#">Hs.591798</a> | <a href="#">HLA-DQA2</a>   | 6p21.32  |
| 596 | <a href="#">X12544</a>       | <a href="#">Hs.654405</a> | <a href="#">X12544</a>     | 6p21.32  |
| 597 | <a href="#">NM_002996</a>    | <a href="#">Hs.531668</a> | <a href="#">CX3CL1</a>     | 16q13    |
| 598 | <a href="#">NM_030643</a>    | <a href="#">Hs.115099</a> | <a href="#">APOL4</a>      | 22q12.3  |
| 599 | <a href="#">NM_001165</a>    | <a href="#">Hs.127799</a> | <a href="#">BIRC3</a>      | 11q22.2  |
| 600 | <a href="#">NM_003004</a>    | <a href="#">Hs.558009</a> | <a href="#">SECTM1</a>     | 17q25.3  |
| 601 | <a href="#">NM_016135</a>    | <a href="#">Hs.272398</a> | <a href="#">ETV7</a>       | 6p21.31  |
| 602 | <a href="#">NM_005409</a>    | <a href="#">Hs.632592</a> | <a href="#">CXCL11</a>     | 4q21.1   |
| 603 | <a href="#">NM_006398</a>    | <a href="#">Hs.44532</a>  | <a href="#">UBD</a>        | 6p22.1   |
| 604 | <a href="#">NM_001010919</a> | <a href="#">Hs.381220</a> | <a href="#">FAM26F</a>     | 6q22.1   |
| 605 | <a href="#">NM_007315</a>    | <a href="#">Hs.642990</a> | <a href="#">STAT1</a>      | 2q32.2   |
| 606 | <a href="#">NM_002053</a>    | <a href="#">Hs.62661</a>  | <a href="#">GBP1</a>       | 1p22.2   |
| 607 | <a href="#">NM_002416</a>    | <a href="#">Hs.77367</a>  | <a href="#">CXCL9</a>      | 4q21.1   |
| 608 | <a href="#">NM_001565</a>    | <a href="#">Hs.632586</a> | <a href="#">CXCL10</a>     | 4q21.1   |
| 609 | <a href="#">NM_052941</a>    | <a href="#">Hs.409925</a> | <a href="#">GBP4</a>       | 1p22.2   |
| 610 | <a href="#">NM_002164</a>    | <a href="#">Hs.840</a>    | <a href="#">INDO</a>       | 8p11.21  |
| 611 | <a href="#">NM_173574</a>    | <a href="#">Hs.353208</a> | <a href="#">ZNF683</a>     | 1p36.11  |
| 612 | <a href="#">NM_001768</a>    | <a href="#">Hs.85258</a>  | <a href="#">CD8A</a>       | 2p11.2   |
| 613 | <a href="#">NM_033423</a>    | <a href="#">Hs.348264</a> | <a href="#">GZMH</a>       | 14q12    |
| 614 | <a href="#">NM_002985</a>    | <a href="#">Hs.514821</a> | <a href="#">CCL5</a>       | 17q12    |
| 615 | <a href="#">NM_002286</a>    | <a href="#">Hs.409523</a> | <a href="#">LAG3</a>       | 12p13.31 |
| 616 | <a href="#">NM_006144</a>    | <a href="#">Hs.90708</a>  | <a href="#">GZMA</a>       | 5q11.2   |
| 617 | <a href="#">NM_006433</a>    | <a href="#">Hs.105806</a> | <a href="#">GNLY</a>       | 2p11.2   |
| 618 | <a href="#">NM_002995</a>    | <a href="#">Hs.546295</a> | <a href="#">XCL1</a>       | 1q24.2   |
| 619 | <a href="#">NM_006399</a>    | <a href="#">Hs.509964</a> | <a href="#">BATF</a>       | 14q24.3  |
| 620 | <a href="#">THC2657355</a>   |                           | <a href="#">THC2657355</a> | 7q22.3   |
| 621 | <a href="#">NM_002838</a>    | <a href="#">Hs.654514</a> | <a href="#">PTPRC</a>      | 1q31.3   |

|     |                                 |                           |                            |          |
|-----|---------------------------------|---------------------------|----------------------------|----------|
| 622 | <a href="#">NM_001778</a>       | <a href="#">Hs.243564</a> | <a href="#">CD48</a>       | 1q23.3   |
| 623 | <a href="#">NM_002258</a>       | <a href="#">Hs.169824</a> | <a href="#">KLRB1</a>      | 12p13.31 |
| 624 | <a href="#">NM_001803</a>       | <a href="#">Hs.276770</a> | <a href="#">CD52</a>       | 1p36.11  |
| 625 | <a href="#">NM_006564</a>       | <a href="#">Hs.34526</a>  | <a href="#">CXCR6</a>      | 3p21.31  |
| 626 | <a href="#">NM_000732</a>       | <a href="#">Hs.504048</a> | <a href="#">CD3D</a>       | 11q23.3  |
| 627 | <a href="#">NM_198196</a>       | <a href="#">Hs.142023</a> | <a href="#">CD96</a>       | 3q13.2   |
| 628 | <a href="#">NM_198517</a>       | <a href="#">Hs.534648</a> | <a href="#">TBC1D10C</a>   | 11q13.1  |
| 629 | <a href="#">M20432</a>          | <a href="#">Hs.409934</a> | <a href="#">HLA-DQB1</a>   | 6p21.32  |
| 630 | <a href="#">NM_002122</a>       | <a href="#">Hs.387679</a> | <a href="#">HLA-DQA1</a>   | 6p21.32  |
| 631 | <a href="#">NM_198232</a>       | <a href="#">Hs.78224</a>  | <a href="#">RNASE1</a>     | 14q11.2  |
| 632 | <a href="#">NR_003491</a>       | <a href="#">Hs.517502</a> | <a href="#">MIAT</a>       | 22q12.1  |
| 633 | <a href="#">NM_000417</a>       | <a href="#">Hs.231367</a> | <a href="#">IL2RA</a>      | 10p15.1  |
| 634 | <a href="#">NM_006840</a>       | <a href="#">Hs.655338</a> | <a href="#">LILRB5</a>     | 19q13.42 |
| 635 | <a href="#">M27126</a>          | <a href="#">Hs.654405</a> | <a href="#">M27126</a>     |          |
| 636 | <a href="#">NM_004355</a>       | <a href="#">Hs.436568</a> | <a href="#">CD74</a>       | 5q33.1   |
| 637 | <a href="#">NM_002118</a>       | <a href="#">Hs.654428</a> | <a href="#">HLA-DMB</a>    | 6p21.32  |
| 638 | <a href="#">NM_002121</a>       | <a href="#">Hs.485130</a> | <a href="#">HLA-DPB1</a>   | 6p21.32  |
| 639 | <a href="#">NR_001435</a>       |                           | <a href="#">HLA-DPB2</a>   | 6p21.32  |
| 640 | <a href="#">BE926212</a>        |                           | <a href="#">BE926212</a>   | 4p13     |
| 641 | <a href="#">NM_021983</a>       | <a href="#">Hs.654405</a> | <a href="#">HLA-DRB4</a>   |          |
| 642 | <a href="#">BC106057</a>        | <a href="#">Hs.654405</a> | <a href="#">HLA-DRB3</a>   | 6p21.32  |
| 643 | <a href="#">NM_002125</a>       | <a href="#">Hs.534322</a> | <a href="#">HLA-DRB5</a>   | 6p21.32  |
| 644 | <a href="#">NM_002123</a>       | <a href="#">Hs.409934</a> | <a href="#">HLA-DQB1</a>   | 6p21.32  |
| 645 | <a href="#">NM_000952</a>       | <a href="#">Hs.433540</a> | <a href="#">PTAFR</a>      | 1p35.3   |
| 646 | <a href="#">NM_052942</a>       | <a href="#">Hs.513726</a> | <a href="#">GBP5</a>       | 1p22.2   |
| 647 | <a href="#">NM_001953</a>       | <a href="#">Hs.592212</a> | <a href="#">ECGF1</a>      | 22q13.33 |
| 648 | <a href="#">NM_033050</a>       | <a href="#">Hs.279575</a> | <a href="#">SUCNR1</a>     | 3q25.1   |
| 649 | <a href="#">NM_002988</a>       | <a href="#">Hs.143961</a> | <a href="#">CCL18</a>      | 17q12    |
| 650 | <a href="#">ENST00000368054</a> | <a href="#">Hs.610260</a> | <a href="#">CD84</a>       | 1q23.2   |
| 651 | <a href="#">NM_000211</a>       | <a href="#">Hs.375957</a> | <a href="#">ITGB2</a>      | 21q22.3  |
| 652 | <a href="#">NM_001005340</a>    | <a href="#">Hs.190495</a> | <a href="#">GPNMB</a>      | 7p15.3   |
| 653 | <a href="#">NM_001645</a>       | <a href="#">Hs.110675</a> | <a href="#">APOC1</a>      | 19q13.32 |
| 654 | <a href="#">NM_000041</a>       | <a href="#">Hs.654439</a> | <a href="#">APOE</a>       | 19q13.32 |
| 655 | <a href="#">THC2582296</a>      | <a href="#">Hs.654439</a> | <a href="#">THC2582296</a> | 19q13.32 |
| 656 | <a href="#">NM_001017986</a>    | <a href="#">Hs.534956</a> | <a href="#">FCGR1B</a>     | 1p11.2   |
| 657 | <a href="#">NM_138715</a>       | <a href="#">Hs.147635</a> | <a href="#">MSR1</a>       | 8p22     |
| 658 | <a href="#">BC031655</a>        | <a href="#">Hs.10649</a>  | <a href="#">C1orf38</a>    | 1p35.3   |
| 659 | <a href="#">NM_007268</a>       | <a href="#">Hs.8904</a>   | <a href="#">VSIG4</a>      | Xq12     |
| 660 | <a href="#">NM_004244</a>       | <a href="#">Hs.504641</a> | <a href="#">CD163</a>      | 12p13.31 |
| 661 | <a href="#">NM_024021</a>       | <a href="#">Hs.325960</a> | <a href="#">MS4A4A</a>     | 11q12.2  |
| 662 | <a href="#">NM_000569</a>       | <a href="#">Hs.372679</a> | <a href="#">FCGR3A</a>     | 1q23.3   |
| 663 | <a href="#">NM_004172</a>       | <a href="#">Hs.481918</a> | <a href="#">SLC1A3</a>     | 5p13.2   |
| 664 | <a href="#">BC022548</a>        | <a href="#">Hs.125293</a> | <a href="#">RASGEF1A</a>   | 10q11.21 |
| 665 | <a href="#">NM_005532</a>       | <a href="#">Hs.532634</a> | <a href="#">IFI27</a>      | 14q32.13 |
| 666 | <a href="#">NM_004335</a>       | <a href="#">Hs.118110</a> | <a href="#">BST2</a>       | 19p13.11 |
| 667 | <a href="#">NM_017631</a>       | <a href="#">Hs.591710</a> | <a href="#">FLJ20035</a>   | 4q32.3   |
| 668 | <a href="#">NM_006417</a>       | <a href="#">Hs.82316</a>  | <a href="#">IFI44</a>      | 1p31.1   |
| 669 | <a href="#">NM_001547</a>       | <a href="#">Hs.437609</a> | <a href="#">IFIT2</a>      | 10q23.31 |
| 670 | <a href="#">NM_001548</a>       | <a href="#">Hs.20315</a>  | <a href="#">IFIT1</a>      | 10q23.31 |
| 671 | <a href="#">NM_080657</a>       | <a href="#">Hs.17518</a>  | <a href="#">RSAD2</a>      | 2p25.2   |
| 672 | <a href="#">NM_006820</a>       | <a href="#">Hs.389724</a> | <a href="#">IFI44L</a>     | 1p31.1   |
| 673 | <a href="#">NM_002462</a>       | <a href="#">Hs.517307</a> | <a href="#">MX1</a>        | 21q22.3  |

|     |                              |                           |                              |          |
|-----|------------------------------|---------------------------|------------------------------|----------|
| 674 | <a href="#">NM_005101</a>    | <a href="#">Hs.458485</a> | <a href="#">ISG15</a>        | 1p36.33  |
| 675 | <a href="#">NM_004796</a>    | <a href="#">Hs.368307</a> | <a href="#">NRXN3</a>        | 14q31.1  |
| 676 | <a href="#">NM_017855</a>    | <a href="#">Hs.143811</a> | <a href="#">ODAM</a>         | 4q13.3   |
| 677 | <a href="#">AB007954</a>     | <a href="#">Hs.604754</a> | <a href="#">KIAA0485</a>     | 1p31.3   |
| 678 | <a href="#">NM_017415</a>    | <a href="#">Hs.655084</a> | <a href="#">KLHL3</a>        | 5q31.2   |
| 679 | <a href="#">BX537788</a>     | <a href="#">Hs.688969</a> | <a href="#">BX537788</a>     | 10p14    |
| 680 | <a href="#">NM_032679</a>    | <a href="#">Hs.148322</a> | <a href="#">ZNF577</a>       | 19q13.33 |
| 681 | <a href="#">AK125482</a>     | <a href="#">Hs.591496</a> | <a href="#">MEX3A</a>        | 1q22     |
| 682 | <a href="#">XM_044166</a>    | <a href="#">Hs.591496</a> | <a href="#">MEX3A</a>        | 1q22     |
| 683 | <a href="#">NM_005723</a>    | <a href="#">Hs.591706</a> | <a href="#">TSPAN5</a>       | 4q23     |
| 684 | <a href="#">AK055659</a>     | <a href="#">Hs.591706</a> | <a href="#">TSPAN5</a>       | 4q23     |
| 685 | <a href="#">BC010538</a>     | <a href="#">Hs.657197</a> | <a href="#">C18orf18</a>     | 18p11.31 |
| 686 | <a href="#">DQ179139</a>     | <a href="#">Hs.558645</a> | <a href="#">C21orf99</a>     | 9q12     |
| 687 | <a href="#">NM_003970</a>    | <a href="#">Hs.443683</a> | <a href="#">MYOM2</a>        | 8p23.3   |
| 688 | <a href="#">NR_003288</a>    | <a href="#">Hs.674810</a> | <a href="#">LOC729603</a>    | 6q25.3   |
| 689 | <a href="#">AK128234</a>     | <a href="#">Hs.416925</a> | <a href="#">CEACAM19</a>     | 19q13.31 |
| 690 | <a href="#">BC030123</a>     | <a href="#">Hs.163155</a> | <a href="#">LOC441461</a>    | 9q31.1   |
| 691 | <a href="#">BC062758</a>     | <a href="#">Hs.571424</a> | <a href="#">BC062758</a>     | 8q21.11  |
| 692 | <a href="#">BC034319</a>     | <a href="#">Hs.363526</a> | <a href="#">BC034319</a>     | 8p12     |
| 693 | <a href="#">NM_014289</a>    | <a href="#">Hs.496593</a> | <a href="#">CAPN6</a>        | Xq22.3   |
| 694 | <a href="#">NM_005654</a>    | <a href="#">Hs.519445</a> | <a href="#">NR2F1</a>        | 5q15     |
| 695 | <a href="#">NM_004058</a>    | <a href="#">Hs.584744</a> | <a href="#">CAPS</a>         | 19p13.3  |
| 696 | <a href="#">AB051549</a>     | <a href="#">Hs.525247</a> | <a href="#">ZFX2</a>         | 14q11.2  |
| 697 | <a href="#">NM_030770</a>    | <a href="#">Hs.46720</a>  | <a href="#">TMPRSS5</a>      | 11q23.2  |
| 698 | <a href="#">NM_152529</a>    | <a href="#">Hs.516604</a> | <a href="#">GPR155</a>       | 2q31.1   |
| 699 | <a href="#">NM_001033045</a> | <a href="#">Hs.516604</a> | <a href="#">GPR155</a>       | 2q31.1   |
| 700 | <a href="#">NM_030817</a>    | <a href="#">Hs.23388</a>  | <a href="#">APOLD1</a>       | 12p13.1  |
| 701 | <a href="#">NM_032866</a>    | <a href="#">Hs.148989</a> | <a href="#">CGNL1</a>        | 15q21.3  |
| 702 | <a href="#">NM_021069</a>    | <a href="#">Hs.655143</a> | <a href="#">SORBS2</a>       | 4q35.1   |
| 703 | <a href="#">AK094603</a>     |                           | <a href="#">AK094603</a>     | 4q35.1   |
| 704 | <a href="#">NM_001853</a>    | <a href="#">Hs.126248</a> | <a href="#">COL9A3</a>       | 20q13.33 |
| 705 | <a href="#">NM_014454</a>    | <a href="#">Hs.591336</a> | <a href="#">SESN1</a>        | 6q21     |
| 706 | <a href="#">THC2651501</a>   |                           | <a href="#">THC2651501</a>   | 2q14.2   |
| 707 | <a href="#">NM_002193</a>    | <a href="#">Hs.1735</a>   | <a href="#">INHBB</a>        | 2q14.2   |
| 708 | <a href="#">NM_003483</a>    | <a href="#">Hs.505924</a> | <a href="#">HMGA2</a>        | 12q14.3  |
| 709 | <a href="#">THC2655811</a>   |                           | <a href="#">THC2655811</a>   | 12q14.3  |
| 710 | <a href="#">NM_000131</a>    | <a href="#">Hs.36989</a>  | <a href="#">F7</a>           | 13q34    |
| 711 | <a href="#">A_24_P863363</a> |                           | <a href="#">A_24_P863363</a> | 14q23.1  |
| 712 | <a href="#">NM_207381</a>    | <a href="#">Hs.306343</a> | <a href="#">TNFAIP8L3</a>    | 15q21.2  |
| 713 | <a href="#">NM_001007139</a> | <a href="#">Hs.523414</a> | <a href="#">IGF2</a>         | 11p15.5  |
| 714 | <a href="#">NM_001971</a>    | <a href="#">Hs.348395</a> | <a href="#">ELA1</a>         | 12q13.13 |
| 715 | <a href="#">THC2647658</a>   |                           | <a href="#">THC2647658</a>   | 5q35.3   |
| 716 | <a href="#">NM_000612</a>    | <a href="#">Hs.523414</a> | <a href="#">IGF2</a>         | 11p15.5  |
| 717 | <a href="#">THC2644672</a>   |                           | <a href="#">THC2644672</a>   | 16p13.3  |
| 718 | <a href="#">AK074614</a>     |                           | <a href="#">AK074614</a>     | 11p15.5  |
| 719 | <a href="#">AL117401</a>     | <a href="#">Hs.534980</a> | <a href="#">DKFZP434P211</a> | 22q11.23 |
| 720 | <a href="#">THC2532455</a>   |                           | <a href="#">THC2532455</a>   | 2q37.3   |
| 721 | <a href="#">BC104421</a>     | <a href="#">Hs.645610</a> | <a href="#">BC104421</a>     | 11p15.5  |
| 722 | <a href="#">NM_000371</a>    | <a href="#">Hs.427202</a> | <a href="#">ITR</a>          | 18q12.1  |
| 723 | <a href="#">NM_001063</a>    | <a href="#">Hs.518267</a> | <a href="#">TF</a>           | 3q22.1   |
| 724 | <a href="#">AK055418</a>     | <a href="#">Hs.592518</a> | <a href="#">AK055418</a>     | 10q21.1  |
| 725 | <a href="#">NM_006516</a>    | <a href="#">Hs.473721</a> | <a href="#">SLC2A1</a>       | 1p34.2   |

|     |                                 |                           |                                 |          |
|-----|---------------------------------|---------------------------|---------------------------------|----------|
| 726 | <a href="#">NM_001202</a>       | <a href="#">Hs.68879</a>  | <a href="#">BMP4</a>            | 14q22.2  |
| 727 | <a href="#">NM_004626</a>       | <a href="#">Hs.108219</a> | <a href="#">WNT11</a>           | 11q13.5  |
| 728 | <a href="#">NM_002899</a>       | <a href="#">Hs.529571</a> | <a href="#">RBP1</a>            | 3q23     |
| 729 | <a href="#">NR_002196</a>       | <a href="#">Hs.533566</a> | <a href="#">H19</a>             | 11p15.5  |
| 730 | <a href="#">NM_015432</a>       | <a href="#">Hs.188781</a> | <a href="#">PLEKHG4</a>         | 16q22.1  |
| 731 | <a href="#">A_24_P916853</a>    |                           | <a href="#">A_24_P916853</a>    | 8q24.21  |
| 732 | <a href="#">AK097639</a>        | <a href="#">Hs.355950</a> | <a href="#">CBWD3</a>           | 9p11.2   |
| 733 | <a href="#">NM_198853</a>       | <a href="#">Hs.645328</a> | <a href="#">TRIM74</a>          | 7q11.23  |
| 734 | <a href="#">A_24_P852099</a>    |                           | <a href="#">A_24_P852099</a>    |          |
| 735 | <a href="#">CR627362</a>        | <a href="#">Hs.654650</a> | <a href="#">LOC595101</a>       | 16p11.2  |
| 736 | <a href="#">THC2551927</a>      |                           | <a href="#">THC2551927</a>      | 3q28     |
| 737 | <a href="#">AK021738</a>        | <a href="#">Hs.632227</a> | <a href="#">TMC6</a>            | 17q25.3  |
| 738 | <a href="#">AK057576</a>        | <a href="#">Hs.675850</a> | <a href="#">AK057576</a>        | 12q24.33 |
| 739 | <a href="#">THC2529512</a>      |                           | <a href="#">THC2529512</a>      | 19q13.11 |
| 740 | <a href="#">L40520</a>          | <a href="#">Hs.654587</a> | <a href="#">L40520</a>          | 5q13.2   |
| 741 | <a href="#">AL512711</a>        | <a href="#">Hs.26593</a>  | <a href="#">HDAC10</a>          | 22q13.33 |
| 742 | <a href="#">THC2781073</a>      |                           | <a href="#">THC2781073</a>      | 16q22.1  |
| 743 | <a href="#">AF289610</a>        | <a href="#">Hs.675915</a> | <a href="#">AF289610</a>        | 2p11.1   |
| 744 | <a href="#">THC2510656</a>      |                           | <a href="#">THC2510656</a>      | 1q21.1   |
| 745 | <a href="#">NR_003370</a>       | <a href="#">Hs.348979</a> | <a href="#">LOC730092</a>       | 16p12.1  |
| 746 | <a href="#">NR_001442</a>       | <a href="#">Hs.72222</a>  | <a href="#">FER1L4</a>          | 20q11.22 |
| 747 | <a href="#">NM_006887</a>       | <a href="#">Hs.503093</a> | <a href="#">ZFP36L2</a>         | 2p21     |
| 748 | <a href="#">NM_021990</a>       | <a href="#">Hs.22785</a>  | <a href="#">GABRE</a>           | Xq28     |
| 749 | <a href="#">AK124788</a>        |                           | <a href="#">GGTL3</a>           | 20q11.22 |
| 750 | <a href="#">ENST00000378052</a> | <a href="#">Hs.490512</a> | <a href="#">ZNF783</a>          | 7q36.1   |
| 751 | <a href="#">BC041959</a>        | <a href="#">Hs.655573</a> | <a href="#">BC041959</a>        | 7q11.21  |
| 752 | <a href="#">BC010934</a>        | <a href="#">Hs.693802</a> | <a href="#">ZBTB20</a>          | 3q13.31  |
| 753 | <a href="#">AL136621</a>        | <a href="#">Hs.644041</a> | <a href="#">ZMYM2</a>           | 13q12.11 |
| 754 | <a href="#">ENST00000379606</a> | <a href="#">Hs.507783</a> | <a href="#">ENST00000379606</a> | 13q13.3  |
| 755 | <a href="#">THC2607363</a>      |                           | <a href="#">THC2607363</a>      | 5p13.3   |
| 756 | <a href="#">THC2669975</a>      |                           | <a href="#">THC2669975</a>      | 7q31.1   |
| 757 | <a href="#">THC2764893</a>      |                           | <a href="#">THC2764893</a>      | 3q26.31  |
| 758 | <a href="#">AK024934</a>        | <a href="#">Hs.532921</a> | <a href="#">KIAA1641</a>        | 2q11.2   |
| 759 | <a href="#">AK057596</a>        | <a href="#">Hs.651675</a> | <a href="#">LOC150759</a>       | 2q11.2   |
| 760 | <a href="#">BC015370</a>        |                           | <a href="#">BC015370</a>        | 19q13.41 |
| 761 | <a href="#">THC2746807</a>      |                           | <a href="#">THC2746807</a>      | 11p15.4  |
| 762 | <a href="#">NR_002802</a>       | <a href="#">Hs.648467</a> | <a href="#">TncRNA</a>          | 11q13.1  |
| 763 | <a href="#">THC2664215</a>      |                           | <a href="#">THC2664215</a>      | 11p15.5  |
| 764 | <a href="#">AK025142</a>        |                           | <a href="#">DST</a>             | 6p12.1   |
| 765 | <a href="#">AA837799</a>        | <a href="#">Hs.677704</a> | <a href="#">AA837799</a>        | 22q12.3  |
| 766 | <a href="#">BC051317</a>        |                           | <a href="#">RBBP6</a>           | 16p12.1  |
| 767 | <a href="#">BX090412</a>        | <a href="#">Hs.445847</a> | <a href="#">BX090412</a>        | 15q25.1  |
| 768 | <a href="#">AL050097</a>        | <a href="#">Hs.667735</a> | <a href="#">DKFZP586B0319</a>   | 3q29     |
| 769 | <a href="#">THC2611661</a>      |                           | <a href="#">THC2611661</a>      | 11q21    |
| 770 | <a href="#">DB111455</a>        | <a href="#">Hs.660706</a> | <a href="#">DB111455</a>        | 11q21    |
| 771 | <a href="#">THC2697162</a>      |                           | <a href="#">THC2697162</a>      | 3q13.31  |
| 772 | <a href="#">AK129547</a>        | <a href="#">Hs.640055</a> | <a href="#">AK129547</a>        | 6p22.3   |
| 773 | <a href="#">NM_014226</a>       | <a href="#">Hs.104119</a> | <a href="#">RAGE</a>            | 14q32.31 |
| 774 | <a href="#">ENST00000360524</a> | <a href="#">Hs.531547</a> | <a href="#">LOC731479</a>       | 17p11.2  |
| 775 | <a href="#">ENST00000339425</a> |                           | <a href="#">ENST00000339425</a> | 21q11.2  |
| 776 | <a href="#">BC016022</a>        | <a href="#">Hs.679496</a> | <a href="#">BC016022</a>        |          |
| 777 | <a href="#">NM_014141</a>       | <a href="#">Hs.655684</a> | <a href="#">CNTNAP2</a>         | 7q36.1   |

|     |                                 |                           |                                 |          |
|-----|---------------------------------|---------------------------|---------------------------------|----------|
| 778 | <a href="#">NM_007069</a>       | <a href="#">Hs.502775</a> | <a href="#">HRASLS3</a>         | 11q12.3  |
| 779 | <a href="#">NM_000153</a>       | <a href="#">Hs.513439</a> | <a href="#">GALC</a>            | 14q31.3  |
| 780 | <a href="#">NM_006569</a>       | <a href="#">Hs.159525</a> | <a href="#">CGREF1</a>          | 2p23.3   |
| 781 | <a href="#">NM_000849</a>       | <a href="#">Hs.2006</a>   | <a href="#">GSTM3</a>           | 1p13.3   |
| 782 | <a href="#">NM_014505</a>       | <a href="#">Hs.525529</a> | <a href="#">KCNMB4</a>          | 12q15    |
| 783 | <a href="#">NM_013332</a>       | <a href="#">Hs.433213</a> | <a href="#">HIG2</a>            | 7q32.1   |
| 784 | <a href="#">NM_016354</a>       | <a href="#">Hs.235782</a> | <a href="#">SLCO4A1</a>         | 20q13.33 |
| 785 | <a href="#">BX640887</a>        | <a href="#">Hs.400876</a> | <a href="#">LOC388796</a>       | 20q11.23 |
| 786 | <a href="#">ENST00000360896</a> | <a href="#">Hs.400876</a> | <a href="#">ENST00000360896</a> | 20q11.23 |
| 787 | <a href="#">NM_004490</a>       | <a href="#">Hs.411881</a> | <a href="#">GRB14</a>           | 2q24.3   |
| 788 | <a href="#">NM_152559</a>       | <a href="#">Hs.647042</a> | <a href="#">WBSCR27</a>         | 7q11.23  |
| 789 | <a href="#">NM_001628</a>       | <a href="#">Hs.521212</a> | <a href="#">AKR1B1</a>          | 7q33     |
| 790 | <a href="#">NM_001150</a>       | <a href="#">Hs.1239</a>   | <a href="#">ANPEP</a>           | 15q26.1  |
| 791 | <a href="#">NM_133637</a>       | <a href="#">Hs.191705</a> | <a href="#">DQX1</a>            | 2p13.1   |
| 792 | <a href="#">NR_002729</a>       | <a href="#">Hs.349110</a> | <a href="#">MSTP9</a>           | 1p36.13  |
| 793 | <a href="#">NM_004170</a>       | <a href="#">Hs.444915</a> | <a href="#">SLC1A1</a>          | 9p24.2   |
| 794 | <a href="#">NM_001935</a>       | <a href="#">Hs.368912</a> | <a href="#">DPP4</a>            | 2q24.2   |
| 795 | <a href="#">NM_002259</a>       | <a href="#">Hs.512576</a> | <a href="#">KLRC1</a>           | 12p13.2  |
| 796 | <a href="#">NM_002260</a>       | <a href="#">Hs.591157</a> | <a href="#">KLRC2</a>           | 12p13.2  |
| 797 | <a href="#">NM_030806</a>       | <a href="#">Hs.497159</a> | <a href="#">C1orf21</a>         | 1q25.3   |
| 798 | <a href="#">NM_024420</a>       | <a href="#">Hs.497200</a> | <a href="#">PLA2G4A</a>         | 1q31.1   |
| 799 | <a href="#">NM_002395</a>       | <a href="#">Hs.21160</a>  | <a href="#">ME1</a>             | 6q14.2   |
| 800 | <a href="#">XM_940314</a>       | <a href="#">Hs.144372</a> | <a href="#">NLF2</a>            | 15q22.2  |
| 801 | <a href="#">NM_004350</a>       | <a href="#">Hs.170019</a> | <a href="#">RUNX3</a>           | 1p36.11  |
| 802 | <a href="#">AF289562</a>        | <a href="#">Hs.592200</a> | <a href="#">AF289562</a>        | 22q13.1  |
| 803 | <a href="#">AK125361</a>        | <a href="#">Hs.276808</a> | <a href="#">AK125361</a>        | 22q13.1  |
| 804 | <a href="#">NM_004062</a>       | <a href="#">Hs.513660</a> | <a href="#">CDH16</a>           | 16q22.1  |
| 805 | <a href="#">NM_001080395</a>    | <a href="#">Hs.514575</a> | <a href="#">AATK</a>            | 17q25.3  |
| 806 | <a href="#">NM_001040105</a>    | <a href="#">Hs.271819</a> | <a href="#">MUC17</a>           | 7q22.1   |
| 807 | <a href="#">NM_006681</a>       | <a href="#">Hs.418367</a> | <a href="#">NMU</a>             | 4q12     |
| 808 | <a href="#">AK126431</a>        | <a href="#">Hs.656660</a> | <a href="#">LOC654433</a>       | 2q13     |
| 809 | <a href="#">NM_017577</a>       | <a href="#">Hs.24583</a>  | <a href="#">GRAMD1C</a>         | 3q13.31  |
| 810 | <a href="#">NM_004293</a>       | <a href="#">Hs.494163</a> | <a href="#">GDA</a>             | 9q21.13  |
| 811 | <a href="#">NM_020826</a>       | <a href="#">Hs.436643</a> | <a href="#">SYT13</a>           | 11p11.2  |
| 812 | <a href="#">NM_002847</a>       | <a href="#">Hs.490789</a> | <a href="#">PTPRN2</a>          | 7q36.3   |
| 813 | <a href="#">NM_001003954</a>    | <a href="#">Hs.181107</a> | <a href="#">ANXA13</a>          | 8q24.13  |
| 814 | <a href="#">NM_004617</a>       | <a href="#">Hs.133527</a> | <a href="#">TM4SF4</a>          | 3q25.1   |
| 815 | <a href="#">NM_000531</a>       | <a href="#">Hs.117050</a> | <a href="#">OTC</a>             | Xp11.4   |
| 816 | <a href="#">NM_176794</a>       | <a href="#">Hs.421848</a> | <a href="#">MRPL43</a>          | 10q24.31 |
| 817 | <a href="#">NM_004852</a>       | <a href="#">Hs.194725</a> | <a href="#">ONECUT2</a>         | 18q21.31 |
| 818 | <a href="#">K03200</a>          | <a href="#">Hs.662242</a> | <a href="#">K03200</a>          | 3q29     |
| 819 | <a href="#">AK027091</a>        | <a href="#">Hs.464404</a> | <a href="#">AK027091</a>        |          |
| 820 | <a href="#">BC071773</a>        | <a href="#">Hs.626592</a> | <a href="#">BC071773</a>        |          |
| 821 | <a href="#">NM_024786</a>       | <a href="#">Hs.659832</a> | <a href="#">ZDHC11</a>          | 5p15.33  |
| 822 | <a href="#">ENST00000377492</a> |                           | <a href="#">ENST00000377492</a> | 9q12     |
| 823 | <a href="#">NM_001089</a>       | <a href="#">Hs.26630</a>  | <a href="#">ABCA3</a>           | 16p13.3  |
| 824 | <a href="#">NM_153350</a>       | <a href="#">Hs.513244</a> | <a href="#">FBXL16</a>          | 16p13.3  |
| 825 | <a href="#">AY030238</a>        | <a href="#">Hs.552649</a> | <a href="#">LQK1</a>            | 1q32.3   |
| 826 | <a href="#">NM_006896</a>       | <a href="#">Hs.660918</a> | <a href="#">HOXA7</a>           | 7p15.2   |
| 827 | <a href="#">NM_003317</a>       | <a href="#">Hs.94367</a>  | <a href="#">TITF1</a>           | 14q13.3  |
| 828 | <a href="#">A_23_P215382</a>    |                           | <a href="#">A_23_P215382</a>    |          |
| 829 | <a href="#">NM_152739</a>       | <a href="#">Hs.659350</a> | <a href="#">HOXA9</a>           | 7p15.2   |

|     |                                 |                           |                              |          |
|-----|---------------------------------|---------------------------|------------------------------|----------|
| 830 | <a href="#">NM_000522</a>       | <a href="#">Hs.592172</a> | <a href="#">HOXA13</a>       | 7p15.2   |
| 831 | <a href="#">A_32_P234853</a>    |                           | <a href="#">A_32_P234853</a> | 7p15.2   |
| 832 | <a href="#">NR_002795</a>       | <a href="#">Hs.587427</a> | <a href="#">HOXA11S</a>      | 7p15.2   |
| 833 | <a href="#">AK093987</a>        | <a href="#">Hs.634354</a> | <a href="#">AK093987</a>     | 7p15.2   |
| 834 | <a href="#">NM_006547</a>       | <a href="#">Hs.648088</a> | <a href="#">IGF2BP3</a>      | 7p15.3   |
| 835 | <a href="#">NM_032892</a>       | <a href="#">Hs.578544</a> | <a href="#">FRMD5</a>        | 15q15.3  |
| 836 | <a href="#">NM_032876</a>       | <a href="#">Hs.655832</a> | <a href="#">JUB</a>          | 14q11.2  |
| 837 | <a href="#">NM_032034</a>       | <a href="#">Hs.105607</a> | <a href="#">SLC4A11</a>      | 20p13    |
| 838 | <a href="#">NM_002639</a>       | <a href="#">Hs.55279</a>  | <a href="#">SERPINB5</a>     | 18q21.33 |
| 839 | <a href="#">NM_012101</a>       | <a href="#">Hs.504115</a> | <a href="#">TRIM29</a>       | 11q23.3  |
| 840 | <a href="#">NM_032405</a>       | <a href="#">Hs.208600</a> | <a href="#">TMPRSS3</a>      | 21q22.3  |
| 841 | <a href="#">NM_144505</a>       | <a href="#">Hs.104570</a> | <a href="#">KLK8</a>         | 19q13.33 |
| 842 | <a href="#">NM_144947</a>       | <a href="#">Hs.57771</a>  | <a href="#">KLK11</a>        | 19q13.33 |
| 843 | <a href="#">NM_002776</a>       | <a href="#">Hs.275464</a> | <a href="#">KLK10</a>        | 19q13.33 |
| 844 | <a href="#">AK095258</a>        | <a href="#">Hs.16622</a>  | <a href="#">ZNF185</a>       | Xq28     |
| 845 | <a href="#">NM_016584</a>       | <a href="#">Hs.98309</a>  | <a href="#">IL23A</a>        | 12q13.2  |
| 846 | <a href="#">NM_005139</a>       | <a href="#">Hs.480042</a> | <a href="#">ANXA3</a>        | 4q21.21  |
| 847 | <a href="#">NM_001197</a>       | <a href="#">Hs.475055</a> | <a href="#">BIK</a>          | 22q13.2  |
| 848 | <a href="#">NM_005555</a>       | <a href="#">Hs.654613</a> | <a href="#">KRT6B</a>        | 12q13.13 |
| 849 | <a href="#">NM_005554</a>       | <a href="#">Hs.433845</a> | <a href="#">KRT6A</a>        | 12q13.13 |
| 850 | <a href="#">NM_005980</a>       | <a href="#">Hs.2962</a>   | <a href="#">S100P</a>        | 4p16.1   |
| 851 | <a href="#">NM_003064</a>       | <a href="#">Hs.517070</a> | <a href="#">SLPI</a>         | 20q13.12 |
| 852 | <a href="#">BC036550</a>        | <a href="#">Hs.371980</a> | <a href="#">LOC650392</a>    | 16p13.3  |
| 853 | <a href="#">NM_017899</a>       | <a href="#">Hs.525709</a> | <a href="#">TESC</a>         | 12q24.22 |
| 854 | <a href="#">NM_007231</a>       | <a href="#">Hs.522109</a> | <a href="#">SLC6A14</a>      | Xq23     |
| 855 | <a href="#">NR_003038</a>       | <a href="#">Hs.292457</a> | <a href="#">SNHG5</a>        | 6q14.3   |
| 856 | <a href="#">THC2539634</a>      |                           | <a href="#">THC2539634</a>   | 6q14.3   |
| 857 | <a href="#">NM_021021</a>       | <a href="#">Hs.655236</a> | <a href="#">SNTB1</a>        | 8q24.12  |
| 858 | <a href="#">NM_001003845</a>    | <a href="#">Hs.368802</a> | <a href="#">SP5</a>          | 2q31.1   |
| 859 | <a href="#">NM_012342</a>       | <a href="#">Hs.533336</a> | <a href="#">BAMBI</a>        | 10p11.23 |
| 860 | <a href="#">NM_003726</a>       | <a href="#">Hs.316931</a> | <a href="#">SKAP1</a>        | 17q21.32 |
| 861 | <a href="#">NM_002546</a>       | <a href="#">Hs.81791</a>  | <a href="#">TNFRSF11B</a>    | 8q24.12  |
| 862 | <a href="#">AK023647</a>        | <a href="#">Hs.43047</a>  | <a href="#">AK023647</a>     | 21q22.3  |
| 863 | <a href="#">NM_152773</a>       | <a href="#">Hs.135997</a> | <a href="#">MGC33212</a>     | 3q29     |
| 864 | <a href="#">THC2697511</a>      |                           | <a href="#">THC2697511</a>   | Xq25     |
| 865 | <a href="#">NM_003918</a>       | <a href="#">Hs.567381</a> | <a href="#">GYG2</a>         | Xp22.33  |
| 866 | <a href="#">NM_004660</a>       | <a href="#">Hs.99120</a>  | <a href="#">DDX3Y</a>        | Yq11.21  |
| 867 | <a href="#">NM_001039567</a>    | <a href="#">Hs.367761</a> | <a href="#">RPS4Y2</a>       | Yq11.223 |
| 868 | <a href="#">NM_001008</a>       | <a href="#">Hs.282376</a> | <a href="#">RPS4Y1</a>       | Yp11.31  |
| 869 | <a href="#">XR_018247</a>       | <a href="#">Hs.647382</a> | <a href="#">LOC441774</a>    | 16q23.1  |
| 870 | <a href="#">NM_198391</a>       | <a href="#">Hs.41296</a>  | <a href="#">FLRT3</a>        | 20p12.1  |
| 871 | <a href="#">NM_145307</a>       | <a href="#">Hs.58559</a>  | <a href="#">PLEKHK1</a>      | 10q21.2  |
| 872 | <a href="#">NM_001666</a>       | <a href="#">Hs.3109</a>   | <a href="#">ARHGAP4</a>      | Xq28     |
| 873 | <a href="#">NM_032865</a>       | <a href="#">Hs.438292</a> | <a href="#">TNS4</a>         | 17q21.2  |
| 874 | <a href="#">NM_003302</a>       | <a href="#">Hs.534360</a> | <a href="#">TRIP6</a>        | 7q22.1   |
| 875 | <a href="#">ENST00000380456</a> | <a href="#">Hs.375142</a> | <a href="#">RGL3</a>         | 19p13.2  |
| 876 | <a href="#">BC049823</a>        | <a href="#">Hs.380933</a> | <a href="#">RPL22L1</a>      | 3q26.2   |
| 877 | <a href="#">NM_000413</a>       | <a href="#">Hs.654385</a> | <a href="#">HSD17B1</a>      | 17q21.31 |
| 878 | <a href="#">XM_096733</a>       | <a href="#">Hs.150840</a> | <a href="#">C14orf72</a>     | 14q32.31 |
| 879 | <a href="#">NM_022908</a>       | <a href="#">Hs.84753</a>  | <a href="#">NT5DC2</a>       | 3p21.1   |
| 880 | <a href="#">NM_006163</a>       | <a href="#">Hs.75643</a>  | <a href="#">NFE2</a>         | 12q13.13 |
| 881 | <a href="#">NM_005217</a>       | <a href="#">Hs.654448</a> | <a href="#">DEFA3</a>        | 8p23.1   |

|     |                                 |                           |                                 |          |
|-----|---------------------------------|---------------------------|---------------------------------|----------|
| 882 | <a href="#">NM_001030060</a>    | <a href="#">Hs.567973</a> | <a href="#">SAMD5</a>           | 6q24.3   |
| 883 | <a href="#">NM_016569</a>       | <a href="#">Hs.129895</a> | <a href="#">TBX3</a>            | 12q24.21 |
| 884 | <a href="#">NM_014899</a>       | <a href="#">Hs.445030</a> | <a href="#">RHOBTB3</a>         | 5q15     |
| 885 | <a href="#">NM_001013680</a>    | <a href="#">Hs.441039</a> | <a href="#">LOC401233</a>       | 6p25.2   |
| 886 | <a href="#">NM_001001188</a>    | <a href="#">Hs.369759</a> | <a href="#">TRPM2</a>           | 21q22.3  |
| 887 | <a href="#">NM_024017</a>       | <a href="#">Hs.463350</a> | <a href="#">HOXB9</a>           | 17q21.32 |
| 888 | <a href="#">THC2783834</a>      |                           | <a href="#">THC2783834</a>      | 17q21.32 |
| 889 | <a href="#">NM_024016</a>       | <a href="#">Hs.514292</a> | <a href="#">HOXB8</a>           | 17q21.32 |
| 890 | <a href="#">NM_018952</a>       | <a href="#">Hs.98428</a>  | <a href="#">HOXB6</a>           | 17q21.32 |
| 891 | <a href="#">NM_002146</a>       | <a href="#">Hs.654560</a> | <a href="#">HOXB3</a>           | 17q21.32 |
| 892 | <a href="#">NM_000148</a>       | <a href="#">Hs.69747</a>  | <a href="#">FUT1</a>            | 19q13.33 |
| 893 | <a href="#">NM_152573</a>       | <a href="#">Hs.657750</a> | <a href="#">RASEF</a>           | 9q21.32  |
| 894 | <a href="#">NM_024087</a>       | <a href="#">Hs.19404</a>  | <a href="#">ASB9</a>            | Xp22.2   |
| 895 | <a href="#">NM_001012761</a>    | <a href="#">Hs.526902</a> | <a href="#">RGM B</a>           | 5q21.1   |
| 896 | <a href="#">NM_022138</a>       | <a href="#">Hs.487200</a> | <a href="#">SMOC2</a>           | 6q27     |
| 897 | <a href="#">NM_004864</a>       | <a href="#">Hs.616962</a> | <a href="#">GDF15</a>           | 19p13.11 |
| 898 | <a href="#">NM_203347</a>       | <a href="#">Hs.413902</a> | <a href="#">UNQ2541</a>         | 9q34.3   |
| 899 | <a href="#">NM_144691</a>       | <a href="#">Hs.653110</a> | <a href="#">CAPN12</a>          | 19q13.2  |
| 900 | <a href="#">NM_152599</a>       | <a href="#">Hs.213603</a> | <a href="#">FLJ35773</a>        | 17p13.1  |
| 901 | <a href="#">NM_000676</a>       | <a href="#">Hs.167046</a> | <a href="#">ADORA2B</a>         | 17p12    |
| 902 | <a href="#">NM_017650</a>       | <a href="#">Hs.21816</a>  | <a href="#">PPP1R9A</a>         | 7q21.3   |
| 903 | <a href="#">NM_017412</a>       | <a href="#">Hs.40735</a>  | <a href="#">FZD3</a>            | 8p21.1   |
| 904 | <a href="#">NM_145168</a>       | <a href="#">Hs.87779</a>  | <a href="#">HSPC105</a>         | 16q23.3  |
| 905 | <a href="#">THC2657737</a>      |                           | <a href="#">THC2657737</a>      | 12p13.2  |
| 906 | <a href="#">NM_152496</a>       | <a href="#">Hs.534562</a> | <a href="#">MANEAL</a>          | 1p34.3   |
| 907 | <a href="#">NM_005472</a>       | <a href="#">Hs.523899</a> | <a href="#">KCNE3</a>           | 11q13.4  |
| 908 | <a href="#">BC041772</a>        | <a href="#">Hs.567664</a> | <a href="#">SPNS2</a>           | 17p13.2  |
| 909 | <a href="#">ENST00000261275</a> | <a href="#">Hs.383564</a> | <a href="#">KIAA0574</a>        | 15q13.1  |
| 910 | <a href="#">NM_153426</a>       | <a href="#">Hs.643588</a> | <a href="#">PITX2</a>           | 4q25     |
| 911 | <a href="#">AF026246</a>        |                           | <a href="#">AF026246</a>        | 8p23.1   |
| 912 | <a href="#">NM_014861</a>       | <a href="#">Hs.6168</a>   | <a href="#">ATP2C2</a>          | 16q24.1  |
| 913 | <a href="#">NM_018667</a>       | <a href="#">Hs.368421</a> | <a href="#">SMPD3</a>           | 16q22.1  |
| 914 | <a href="#">NM_144603</a>       | <a href="#">Hs.191762</a> | <a href="#">NOXO1</a>           | 16p13.3  |
| 915 | <a href="#">NM_004443</a>       | <a href="#">Hs.2913</a>   | <a href="#">EPHB3</a>           | 3q27.1   |
| 916 | <a href="#">A_32_P177595</a>    |                           | <a href="#">A_32_P177595</a>    | 5q23.3   |
| 917 | <a href="#">BE714307</a>        | <a href="#">Hs.162585</a> | <a href="#">BE714307</a>        | 5q23.3   |
| 918 | <a href="#">NM_001004331</a>    | <a href="#">Hs.412138</a> | <a href="#">MGC88374</a>        | 14q23.3  |
| 919 | <a href="#">AY358366</a>        | <a href="#">Hs.642705</a> | <a href="#">KIAA1324</a>        | 1p13.3   |
| 920 | <a href="#">A_32_P224040</a>    |                           | <a href="#">A_32_P224040</a>    | 14q32.2  |
| 921 | <a href="#">NM_004496</a>       | <a href="#">Hs.163484</a> | <a href="#">FOXA1</a>           | 14q21.1  |
| 922 | <a href="#">NM_001049</a>       | <a href="#">Hs.248160</a> | <a href="#">SSTR1</a>           | 14q21.1  |
| 923 | <a href="#">NM_000597</a>       | <a href="#">Hs.438102</a> | <a href="#">IGFBP2</a>          | 2q35     |
| 924 | <a href="#">NM_000282</a>       | <a href="#">Hs.80741</a>  | <a href="#">PCCA</a>            | 13q32.3  |
| 925 | <a href="#">NM_032342</a>       | <a href="#">Hs.655738</a> | <a href="#">C9orf125</a>        | 9q31.1   |
| 926 | <a href="#">ENST00000374851</a> | <a href="#">Hs.388742</a> | <a href="#">C9orf125</a>        | 9q31.1   |
| 927 | <a href="#">NM_002250</a>       | <a href="#">Hs.10082</a>  | <a href="#">KCNN4</a>           | 19q13.31 |
| 928 | <a href="#">NM_001677</a>       | <a href="#">Hs.291196</a> | <a href="#">ATP1B1</a>          | 1q24.2   |
| 929 | <a href="#">ENST00000382790</a> | <a href="#">Hs.204044</a> | <a href="#">ENST00000382790</a> | 18q21.33 |
| 930 | <a href="#">NM_013314</a>       | <a href="#">Hs.665244</a> | <a href="#">BLNK</a>            | 10q23.33 |
| 931 | <a href="#">AK126354</a>        | <a href="#">Hs.228320</a> | <a href="#">C10orf81</a>        | 10q25.3  |
| 932 | <a href="#">NM_024889</a>       | <a href="#">Hs.228320</a> | <a href="#">C10orf81</a>        | 10q25.3  |
| 933 | <a href="#">NM_032387</a>       | <a href="#">Hs.105448</a> | <a href="#">WNK4</a>            | 17q21.31 |

|     |                                 |                           |                                 |          |
|-----|---------------------------------|---------------------------|---------------------------------|----------|
| 934 | <a href="#">NM_015225</a>       | <a href="#">Hs.262857</a> | <a href="#">KIAA0367</a>        | 9q21.13  |
| 935 | <a href="#">NM_021784</a>       | <a href="#">Hs.155651</a> | <a href="#">FOXA2</a>           | 20p11.21 |
| 936 | <a href="#">NM_020340</a>       | <a href="#">Hs.656215</a> | <a href="#">KIAA1244</a>        | 6q23.3   |
| 937 | <a href="#">ENST00000330640</a> | <a href="#">Hs.194408</a> | <a href="#">ENST00000330640</a> | 6q23.3   |
| 938 | <a href="#">BG216262</a>        | <a href="#">Hs.637431</a> | <a href="#">BG216262</a>        | 3q21.2   |
| 939 | <a href="#">AK074886</a>        | <a href="#">Hs.434403</a> | <a href="#">LOC389634</a>       | 12p13.31 |
| 940 | <a href="#">AB007953</a>        |                           | <a href="#">KIAA0484</a>        | 8p23.1   |
| 941 | <a href="#">NM_000689</a>       | <a href="#">Hs.76392</a>  | <a href="#">ALDH1A1</a>         | 9q21.13  |
| 942 | <a href="#">NM_000300</a>       | <a href="#">Hs.466804</a> | <a href="#">PLA2G2A</a>         | 1p36.13  |
| 943 | <a href="#">A_23_P62857</a>     |                           | <a href="#">A_23_P62857</a>     |          |
| 944 | <a href="#">A_23_P410456</a>    |                           | <a href="#">A_23_P410456</a>    | 11p15.4  |
| 945 | <a href="#">NM_203451</a>       | <a href="#">Hs.422375</a> | <a href="#">LOC400120</a>       | 13q13.3  |
| 946 | <a href="#">CD607715</a>        | <a href="#">Hs.255230</a> | <a href="#">CD607715</a>        | 7q11.21  |
| 947 | <a href="#">ENST00000325900</a> | <a href="#">Hs.374414</a> | <a href="#">ENST00000325900</a> | Xq26.3   |
| 948 | <a href="#">AF516696</a>        | <a href="#">Hs.656687</a> | <a href="#">CACNA2D3</a>        | 3p14.3   |
| 949 | <a href="#">AK125510</a>        | <a href="#">Hs.650801</a> | <a href="#">C1orf104</a>        | 1q22     |
| 950 | <a href="#">NM_025193</a>       | <a href="#">Hs.460618</a> | <a href="#">HSD3B7</a>          | 16p11.2  |
| 951 | <a href="#">NM_014337</a>       | <a href="#">Hs.438587</a> | <a href="#">PPIL2</a>           | 22q11.21 |
| 952 | <a href="#">AK056520</a>        | <a href="#">Hs.694296</a> | <a href="#">FLJ31958</a>        | 10q11.23 |
| 953 | <a href="#">THC2780599</a>      |                           | <a href="#">THC2780599</a>      | 17q25.1  |
| 954 | <a href="#">NM_206836</a>       | <a href="#">Hs.15250</a>  | <a href="#">PECI</a>            | 6p25.2   |
| 955 | <a href="#">A_23_P3083</a>      |                           | <a href="#">A_23_P3083</a>      | 14q22.1  |
| 956 | <a href="#">NM_002563</a>       | <a href="#">Hs.654526</a> | <a href="#">P2RY1</a>           | 3q25.2   |
| 957 | <a href="#">BC107798</a>        | <a href="#">Hs.631558</a> | <a href="#">TNNT1</a>           | 19q13.42 |
| 958 | <a href="#">NM_003020</a>       | <a href="#">Hs.156540</a> | <a href="#">SCG5</a>            | 15q13.3  |
| 959 | <a href="#">THC2585656</a>      | <a href="#">Hs.496631</a> | <a href="#">THC2585656</a>      | Xq23     |
| 960 | <a href="#">NM_024829</a>       | <a href="#">Hs.131933</a> | <a href="#">FLJ22662</a>        | 12p13.1  |
| 961 | <a href="#">NM_206927</a>       | <a href="#">Hs.369520</a> | <a href="#">SYTL2</a>           | 11q14.1  |
| 962 | <a href="#">NM_182495</a>       | <a href="#">Hs.446760</a> | <a href="#">FAM55B</a>          | 11q23.2  |
| 963 | <a href="#">NM_152315</a>       | <a href="#">Hs.668531</a> | <a href="#">FAM55A</a>          | 11q23.2  |
| 964 | <a href="#">NM_017678</a>       | <a href="#">Hs.179100</a> | <a href="#">FAM55D</a>          | 11q23.2  |
| 965 | <a href="#">AK094950</a>        | <a href="#">Hs.375762</a> | <a href="#">AK094950</a>        | 15q21.1  |
| 966 | <a href="#">NM_032413</a>       | <a href="#">Hs.112242</a> | <a href="#">C15orf48</a>        | 15q21.1  |
| 967 | <a href="#">NM_021199</a>       | <a href="#">Hs.511251</a> | <a href="#">SQRDL</a>           | 15q21.1  |
| 968 | <a href="#">NM_018690</a>       | <a href="#">Hs.200333</a> | <a href="#">APOB48R</a>         | 16p11.2  |
| 969 | <a href="#">NM_030926</a>       | <a href="#">Hs.111577</a> | <a href="#">ITM2C</a>           | 2q37.1   |
| 970 | <a href="#">NM_018700</a>       | <a href="#">Hs.519514</a> | <a href="#">TRIM36</a>          | 5q22.3   |
| 971 | <a href="#">NM_017636</a>       | <a href="#">Hs.467101</a> | <a href="#">TRPM4</a>           | 19q13.33 |
| 972 | <a href="#">NM_013261</a>       | <a href="#">Hs.527078</a> | <a href="#">PPARGC1A</a>        | 4p15.2   |
| 973 | <a href="#">ENST00000251847</a> | <a href="#">Hs.101774</a> | <a href="#">ENST00000251847</a> | 20p12.1  |
| 974 | <a href="#">NM_002456</a>       | <a href="#">Hs.89603</a>  | <a href="#">MUC1</a>            | 1q22     |
| 975 | <a href="#">NM_018406</a>       | <a href="#">Hs.369646</a> | <a href="#">MUC4</a>            | 3q29     |
| 976 | <a href="#">NM_025080</a>       | <a href="#">Hs.535326</a> | <a href="#">ASRGL1</a>          | 11q12.3  |
| 977 | <a href="#">NM_000240</a>       | <a href="#">Hs.183109</a> | <a href="#">MAOA</a>            | Xp11.3   |
| 978 | <a href="#">NM_003645</a>       | <a href="#">Hs.11729</a>  | <a href="#">SLC27A2</a>         | 15q21.2  |
| 979 | <a href="#">NM_000901</a>       | <a href="#">Hs.163924</a> | <a href="#">NR3C2</a>           | 4q31.23  |
| 980 | <a href="#">NM_015393</a>       | <a href="#">Hs.105460</a> | <a href="#">DKFZP564O0823</a>   | 4q13.3   |
| 981 | <a href="#">NM_138409</a>       | <a href="#">Hs.370055</a> | <a href="#">C6orf117</a>        | 6q14.3   |
| 982 | <a href="#">NM_018423</a>       | <a href="#">Hs.24979</a>  | <a href="#">STYK1</a>           | 12p13.2  |
| 983 | <a href="#">NM_017821</a>       | <a href="#">Hs.524626</a> | <a href="#">RHBDL2</a>          | 1p34.3   |
| 984 | <a href="#">NM_138805</a>       | <a href="#">Hs.61265</a>  | <a href="#">FAM3D</a>           | 3p14.2   |
| 985 | <a href="#">NM_003561</a>       | <a href="#">Hs.567366</a> | <a href="#">PLA2G10</a>         | 16p13.12 |

|      |                                 |                           |                                 |          |
|------|---------------------------------|---------------------------|---------------------------------|----------|
| 986  | <a href="#">NM_003196</a>       | <a href="#">Hs.446354</a> | <a href="#">TCEA3</a>           | 1p36.12  |
| 987  | <a href="#">NM_006633</a>       | <a href="#">Hs.291030</a> | <a href="#">IQGAP2</a>          | 5q13.3   |
| 988  | <a href="#">NM_153229</a>       | <a href="#">Hs.224630</a> | <a href="#">TMEM92</a>          | 17q21.33 |
| 989  | <a href="#">NM_016357</a>       | <a href="#">Hs.525419</a> | <a href="#">LIMA1</a>           | 12q13.13 |
| 990  | <a href="#">NM_001015880</a>    | <a href="#">Hs.524491</a> | <a href="#">PAPSS2</a>          | 10q23.2  |
| 991  | <a href="#">NM_001218</a>       | <a href="#">Hs.210995</a> | <a href="#">CA12</a>            | 15q22.2  |
| 992  | <a href="#">NM_001200</a>       | <a href="#">Hs.73853</a>  | <a href="#">BMP2</a>            | 20p12.3  |
| 993  | <a href="#">NM_025047</a>       | <a href="#">Hs.287702</a> | <a href="#">ARL14</a>           | 3q26.1   |
| 994  | <a href="#">NM_002245</a>       | <a href="#">Hs.208544</a> | <a href="#">KCNK1</a>           | 1q42.2   |
| 995  | <a href="#">NM_001993</a>       | <a href="#">Hs.62192</a>  | <a href="#">F3</a>              | 1p21.3   |
| 996  | <a href="#">A_23_P103951</a>    |                           | <a href="#">A_23_P103951</a>    | 1q32.2   |
| 997  | <a href="#">NM_000574</a>       | <a href="#">Hs.527653</a> | <a href="#">CD55</a>            | 1q32.2   |
| 998  | <a href="#">NM_000716</a>       | <a href="#">Hs.99886</a>  | <a href="#">C4BPB</a>           | 1q32.2   |
| 999  | <a href="#">NM_016619</a>       | <a href="#">Hs.546392</a> | <a href="#">PLAC8</a>           | 4q21.22  |
| 1000 | <a href="#">NM_025214</a>       | <a href="#">Hs.120790</a> | <a href="#">CCDC68</a>          | 18q21.2  |
| 1001 | <a href="#">NM_153840</a>       | <a href="#">Hs.256897</a> | <a href="#">GPR110</a>          | 6p12.3   |
| 1002 | <a href="#">ENST00000267857</a> | <a href="#">Hs.194710</a> | <a href="#">GCNT3</a>           | 15q22.2  |
| 1003 | <a href="#">NM_004751</a>       | <a href="#">Hs.194710</a> | <a href="#">GCNT3</a>           | 15q22.2  |
| 1004 | <a href="#">NM_017723</a>       | <a href="#">Hs.657689</a> | <a href="#">C9orf167</a>        | 9q34.3   |
| 1005 | <a href="#">ENST00000366874</a> |                           | <a href="#">ENST00000366874</a> | 1q41     |
| 1006 | <a href="#">NM_139248</a>       | <a href="#">Hs.68864</a>  | <a href="#">LIPH</a>            | 3q27.2   |
| 1007 | <a href="#">BM768581</a>        | <a href="#">Hs.351126</a> | <a href="#">BM768581</a>        | 3q27.2   |
| 1008 | <a href="#">NM_020672</a>       | <a href="#">Hs.288998</a> | <a href="#">S100A14</a>         | 1q21.3   |
| 1009 | <a href="#">NM_015873</a>       | <a href="#">Hs.103665</a> | <a href="#">VILL</a>            | 3p22.2   |
| 1010 | <a href="#">NM_181644</a>       | <a href="#">Hs.567714</a> | <a href="#">MFSD4</a>           | 1q32.1   |
| 1011 | <a href="#">NM_001285</a>       | <a href="#">Hs.194659</a> | <a href="#">CLCA1</a>           | 1p22.3   |
| 1012 | <a href="#">THC2654007</a>      |                           | <a href="#">THC2654007</a>      | 2p14     |
| 1013 | <a href="#">NM_152338</a>       | <a href="#">Hs.632195</a> | <a href="#">ZG16</a>            |          |
| 1014 | <a href="#">NM_017625</a>       | <a href="#">Hs.50813</a>  | <a href="#">ITLN1</a>           | 1q23.3   |
| 1015 | <a href="#">NM_138938</a>       | <a href="#">Hs.567312</a> | <a href="#">REG3A</a>           | 2p12     |
| 1016 | <a href="#">NM_001008387</a>    | <a href="#">Hs.447084</a> | <a href="#">REG3G</a>           | 2p12     |
| 1017 | <a href="#">NM_006507</a>       | <a href="#">Hs.4158</a>   | <a href="#">REG1B</a>           | 2p12     |
| 1018 | <a href="#">NM_002909</a>       | <a href="#">Hs.49407</a>  | <a href="#">REG1A</a>           | 2p12     |
| 1019 | <a href="#">NM_001002236</a>    | <a href="#">Hs.525557</a> | <a href="#">SERPINA1</a>        | 14q32.13 |
| 1020 | <a href="#">NM_007329</a>       | <a href="#">Hs.279611</a> | <a href="#">DMBT1</a>           | 10q26.13 |
| 1021 | <a href="#">NM_000439</a>       | <a href="#">Hs.78977</a>  | <a href="#">PCSK1</a>           | 5q15     |
| 1022 | <a href="#">NM_021800</a>       | <a href="#">Hs.260720</a> | <a href="#">DNAJC12</a>         | 10q21.3  |
| 1023 | <a href="#">NM_001085</a>       | <a href="#">Hs.534293</a> | <a href="#">SERPINA3</a>        | 14q32.13 |
| 1024 | <a href="#">BX104982</a>        | <a href="#">Hs.192124</a> | <a href="#">BX104982</a>        | 3p22.1   |
| 1025 | <a href="#">NM_002407</a>       | <a href="#">Hs.97644</a>  | <a href="#">SCGB2A1</a>         | 11q12.3  |
| 1026 | <a href="#">NM_005559</a>       | <a href="#">Hs.270364</a> | <a href="#">LAMA1</a>           | 18p11.31 |
| 1027 | <a href="#">BC087840</a>        | <a href="#">Hs.57971</a>  | <a href="#">HES5</a>            | 1p36.32  |
| 1028 | <a href="#">AK126207</a>        | <a href="#">Hs.299329</a> | <a href="#">B3GNT7</a>          | 2q37.1   |
| 1029 | <a href="#">A_32_P169353</a>    |                           | <a href="#">A_32_P169353</a>    | 2q37.1   |
| 1030 | <a href="#">NM_032717</a>       | <a href="#">Hs.99196</a>  | <a href="#">MAG1</a>            | 4q21.23  |
| 1031 | <a href="#">NM_005209</a>       | <a href="#">Hs.415790</a> | <a href="#">CRYBA2</a>          | 2q35     |
| 1032 | <a href="#">NM_024533</a>       | <a href="#">Hs.156784</a> | <a href="#">CHST5</a>           | 16q23.1  |
| 1033 | <a href="#">NM_181726</a>       | <a href="#">Hs.693753</a> | <a href="#">ANKRD37</a>         | 4q35.1   |
| 1034 | <a href="#">NM_022073</a>       | <a href="#">Hs.135507</a> | <a href="#">EGLN3</a>           | 14q13.1  |
| 1035 | <a href="#">AK123483</a>        | <a href="#">Hs.446388</a> | <a href="#">AK123483</a>        | 11p15.5  |
| 1036 | <a href="#">NM_024590</a>       | <a href="#">Hs.22895</a>  | <a href="#">ARSJ</a>            | 4q26     |
| 1037 | <a href="#">NM_004633</a>       | <a href="#">Hs.25333</a>  | <a href="#">IL1R2</a>           | 2q11.2   |

|      |                                 |                           |                                 |          |
|------|---------------------------------|---------------------------|---------------------------------|----------|
| 1038 | <a href="#">NM_198569</a>       | <a href="#">Hs.318894</a> | <a href="#">GPR126</a>          | 6q24.1   |
| 1039 | <a href="#">NM_000436</a>       | <a href="#">Hs.278277</a> | <a href="#">OXCT1</a>           | 5p13.1   |
| 1040 | <a href="#">A_23_P120644</a>    |                           | <a href="#">A_23_P120644</a>    | 20q11.23 |
| 1041 | <a href="#">NM_014056</a>       | <a href="#">Hs.7917</a>   | <a href="#">HIGD1A</a>          | 3p22.1   |
| 1042 | <a href="#">NM_004235</a>       | <a href="#">Hs.376206</a> | <a href="#">KLF4</a>            | 9q31.2   |
| 1043 | <a href="#">NM_033342</a>       | <a href="#">Hs.487412</a> | <a href="#">TRIM7</a>           | 5q35.3   |
| 1044 | <a href="#">NM_138340</a>       | <a href="#">Hs.397978</a> | <a href="#">ABHD3</a>           | 18q11.2  |
| 1045 | <a href="#">NM_012465</a>       | <a href="#">Hs.154296</a> | <a href="#">TLL2</a>            | 10q24.1  |
| 1046 | <a href="#">THC2660636</a>      |                           | <a href="#">THC2660636</a>      | 17p13.1  |
| 1047 | <a href="#">NM_007312</a>       | <a href="#">Hs.75619</a>  | <a href="#">HYAL1</a>           | 3p21.31  |
| 1048 | <a href="#">NM_004970</a>       | <a href="#">Hs.839</a>    | <a href="#">IGFALS</a>          | 16p13.3  |
| 1049 | <a href="#">NM_138969</a>       | <a href="#">Hs.170673</a> | <a href="#">RDHE2</a>           | 8q12.1   |
| 1050 | <a href="#">NM_005423</a>       | <a href="#">Hs.2979</a>   | <a href="#">TFF2</a>            | 21q22.3  |
| 1051 | <a href="#">NM_002257</a>       | <a href="#">Hs.123107</a> | <a href="#">KLK1</a>            | 19q13.33 |
| 1052 | <a href="#">NM_174953</a>       | <a href="#">Hs.513870</a> | <a href="#">ATP2A3</a>          | 17p13.2  |
| 1053 | <a href="#">NM_005476</a>       | <a href="#">Hs.5920</a>   | <a href="#">GNE</a>             | 9p13.3   |
| 1054 | <a href="#">NM_024101</a>       | <a href="#">Hs.102406</a> | <a href="#">MLPH</a>            | 2q37.3   |
| 1055 | <a href="#">BC022217</a>        | <a href="#">Hs.132340</a> | <a href="#">C6orf85</a>         | 6p25.2   |
| 1056 | <a href="#">AK091508</a>        |                           | <a href="#">AK091508</a>        | 9q12     |
| 1057 | <a href="#">NM_139242</a>       | <a href="#">Hs.531615</a> | <a href="#">MTFMT</a>           | 15q22.31 |
| 1058 | <a href="#">THC2647276</a>      |                           | <a href="#">THC2647276</a>      | 8q24.13  |
| 1059 | <a href="#">NM_006278</a>       | <a href="#">Hs.591947</a> | <a href="#">ST3GAL4</a>         | 11q24.2  |
| 1060 | <a href="#">NM_174921</a>       | <a href="#">Hs.576320</a> | <a href="#">C4orf34</a>         | 4p14     |
| 1061 | <a href="#">A_24_P798431</a>    |                           | <a href="#">A_24_P798431</a>    | 4p14     |
| 1062 | <a href="#">NM_003225</a>       | <a href="#">Hs.162807</a> | <a href="#">TFF1</a>            | 21q22.3  |
| 1063 | <a href="#">BC010526</a>        | <a href="#">Hs.383197</a> | <a href="#">LOC401127</a>       | 4p14     |
| 1064 | <a href="#">THC2736540</a>      |                           | <a href="#">THC2736540</a>      | 21q22.3  |
| 1065 | <a href="#">NM_006408</a>       | <a href="#">Hs.530009</a> | <a href="#">AGR2</a>            | 7p21.1   |
| 1066 | <a href="#">NM_176813</a>       | <a href="#">Hs.100686</a> | <a href="#">AGR3</a>            | 7p21.1   |
| 1067 | <a href="#">NM_018414</a>       | <a href="#">Hs.105352</a> | <a href="#">ST6GALNAC1</a>      | 17q25.1  |
| 1068 | <a href="#">NM_017417</a>       | <a href="#">Hs.511985</a> | <a href="#">GALNT8</a>          | 12p13.32 |
| 1069 | <a href="#">NM_182532</a>       | <a href="#">Hs.663950</a> | <a href="#">TMEM61</a>          | 1p32.3   |
| 1070 | <a href="#">NM_003657</a>       | <a href="#">Hs.400556</a> | <a href="#">BCAS1</a>           | 20q13.2  |
| 1071 | <a href="#">NM_005187</a>       | <a href="#">Hs.513811</a> | <a href="#">CBFA2T3</a>         | 16q24.3  |
| 1072 | <a href="#">NM_003890</a>       | <a href="#">Hs.111732</a> | <a href="#">FCGBP</a>           | 19q13.2  |
| 1073 | <a href="#">NM_032044</a>       | <a href="#">Hs.660883</a> | <a href="#">REG4</a>            | 1p12     |
| 1074 | <a href="#">ENST00000358378</a> | <a href="#">Hs.534332</a> | <a href="#">ENST00000358378</a> | 11p15.5  |
| 1075 | <a href="#">NR_001558</a>       |                           | <a href="#">C20orf56</a>        | 20p11.21 |
| 1076 | <a href="#">NM_014471</a>       | <a href="#">Hs.555934</a> | <a href="#">SPINK4</a>          | 9p13.3   |
| 1077 | <a href="#">NM_198151</a>       | <a href="#">Hs.443169</a> | <a href="#">LOC253012</a>       | 7q21.3   |
| 1078 | <a href="#">NM_019079</a>       | <a href="#">Hs.562195</a> | <a href="#">L1TD1</a>           | 1p31.3   |
| 1079 | <a href="#">NM_024565</a>       | <a href="#">Hs.14070</a>  | <a href="#">CCNJL</a>           | 5q33.3   |
| 1080 | <a href="#">NM_032579</a>       | <a href="#">Hs.307047</a> | <a href="#">RETNLB</a>          | 3q13.13  |
| 1081 | <a href="#">NM_080734</a>       | <a href="#">Hs.2719</a>   | <a href="#">WFDC2</a>           | 20q13.12 |
| 1082 | <a href="#">NM_080736</a>       | <a href="#">Hs.2719</a>   | <a href="#">WFDC2</a>           | 20q13.12 |
| 1083 | <a href="#">NM_033317</a>       | <a href="#">Hs.417795</a> | <a href="#">DMKN</a>            | 19q13.12 |
| 1084 | <a href="#">NM_024989</a>       | <a href="#">Hs.229988</a> | <a href="#">PGAP1</a>           | 2q33.1   |
| 1085 | <a href="#">NM_153225</a>       | <a href="#">Hs.439040</a> | <a href="#">RPESP</a>           | 8q21.11  |
| 1086 | <a href="#">NM_032229</a>       | <a href="#">Hs.525105</a> | <a href="#">SLITRK6</a>         | 13q31.1  |
| 1087 | <a href="#">NM_004056</a>       | <a href="#">Hs.654388</a> | <a href="#">CA8</a>             | 8q12.1   |
| 1088 | <a href="#">NM_006533</a>       | <a href="#">Hs.646364</a> | <a href="#">MIA</a>             | 19q13.2  |
| 1089 | <a href="#">NM_000239</a>       | <a href="#">Hs.524579</a> | <a href="#">LYZ</a>             | 12q15    |

|      |                              |                           |                              |          |
|------|------------------------------|---------------------------|------------------------------|----------|
| 1090 | <a href="#">THC2682885</a>   |                           | <a href="#">THC2682885</a>   | 17q23.1  |
| 1091 | <a href="#">NM_138799</a>    | <a href="#">Hs.467634</a> | <a href="#">MBOAT2</a>       | 2p25.1   |
| 1092 | <a href="#">NM_003071</a>    | <a href="#">Hs.3068</a>   | <a href="#">HLTF</a>         | 3q24     |
| 1093 | <a href="#">NM_006072</a>    | <a href="#">Hs.131342</a> | <a href="#">CCL26</a>        | 7q11.23  |
| 1094 | <a href="#">NM_002888</a>    | <a href="#">Hs.131269</a> | <a href="#">RARRES1</a>      | 3q25.33  |
| 1095 | <a href="#">NM_020169</a>    | <a href="#">Hs.478067</a> | <a href="#">LXN</a>          | 3q25.32  |
| 1096 | <a href="#">NM_014751</a>    | <a href="#">Hs.336994</a> | <a href="#">MTSS1</a>        | 8q24.13  |
| 1097 | <a href="#">NM_002863</a>    | <a href="#">Hs.282417</a> | <a href="#">PYGL</a>         | 14q22.1  |
| 1098 | <a href="#">NM_014747</a>    | <a href="#">Hs.654808</a> | <a href="#">RIMS3</a>        | 1p34.2   |
| 1099 | <a href="#">NM_002353</a>    | <a href="#">Hs.23582</a>  | <a href="#">TACSTD2</a>      | 1p32.1   |
| 1100 | <a href="#">NM_001311</a>    | <a href="#">Hs.70327</a>  | <a href="#">CRIP1</a>        | 14q32.33 |
| 1101 | <a href="#">A_23_P21882</a>  |                           | <a href="#">A_23_P21882</a>  |          |
| 1102 | <a href="#">A_24_P110601</a> |                           | <a href="#">A_24_P110601</a> | 22q11.23 |
| 1103 | <a href="#">NM_018013</a>    | <a href="#">Hs.445244</a> | <a href="#">SOBP</a>         | 6q21     |
| 1104 | <a href="#">NM_080685</a>    | <a href="#">Hs.436142</a> | <a href="#">PTPN13</a>       | 4q21.3   |
| 1105 | <a href="#">NM_000853</a>    | <a href="#">Hs.268573</a> | <a href="#">GSTT1</a>        | 22q11.23 |
| 1106 | <a href="#">NM_144676</a>    | <a href="#">Hs.658619</a> | <a href="#">TMED6</a>        | 16q22.1  |
| 1107 | <a href="#">AF275804</a>     | <a href="#">Hs.237396</a> | <a href="#">AF275804</a>     | 16q12.2  |
| 1108 | <a href="#">BC042557</a>     | <a href="#">Hs.31409</a>  | <a href="#">LOC120376</a>    | 11q23.1  |
| 1109 | <a href="#">NM_030929</a>    | <a href="#">Hs.632079</a> | <a href="#">KAZALD1</a>      | 10q24.31 |
| 1110 | <a href="#">NM_003695</a>    | <a href="#">Hs.415762</a> | <a href="#">LY6D</a>         | 8q24.3   |
| 1111 | <a href="#">NM_001505</a>    | <a href="#">Hs.20961</a>  | <a href="#">GPR30</a>        | 7p22.3   |
| 1112 | <a href="#">BE798911</a>     | <a href="#">Hs.662555</a> | <a href="#">BE798911</a>     | 2q31.1   |
| 1113 | <a href="#">NM_030583</a>    | <a href="#">Hs.189445</a> | <a href="#">MATN2</a>        | 8q22.2   |
| 1114 | <a href="#">BM802662</a>     | <a href="#">Hs.586812</a> | <a href="#">BM802662</a>     | 13q13.3  |
| 1115 | <a href="#">NM_000683</a>    | <a href="#">Hs.123022</a> | <a href="#">ADRA2C</a>       | 4p16.2   |
| 1116 | <a href="#">NM_173660</a>    | <a href="#">Hs.122110</a> | <a href="#">DOK7</a>         | 4p16.2   |
| 1117 | <a href="#">NM_004004</a>    | <a href="#">Hs.591234</a> | <a href="#">GJB2</a>         | 13q12.11 |
| 1118 | <a href="#">XM_001131389</a> | <a href="#">Hs.646725</a> | <a href="#">LOC730999</a>    | 10q22.1  |
| 1119 | <a href="#">NM_018192</a>    | <a href="#">Hs.374191</a> | <a href="#">LEPREL1</a>      | 3q28     |
| 1120 | <a href="#">NM_000222</a>    | <a href="#">Hs.479754</a> | <a href="#">KIT</a>          | 4q12     |
| 1121 | <a href="#">NM_005130</a>    | <a href="#">Hs.1690</a>   | <a href="#">FGFBP1</a>       | 4p15.32  |
| 1122 | <a href="#">NM_001007097</a> | <a href="#">Hs.494312</a> | <a href="#">NTRK2</a>        | 9q21.33  |
| 1123 | <a href="#">NM_012385</a>    | <a href="#">Hs.513463</a> | <a href="#">NUPR1</a>        | 16p11.2  |
| 1124 | <a href="#">NM_000163</a>    | <a href="#">Hs.125180</a> | <a href="#">GHR</a>          | 5p12     |
| 1125 | <a href="#">NM_020436</a>    | <a href="#">Hs.517113</a> | <a href="#">SALL4</a>        | 20q13.2  |
| 1126 | <a href="#">BC041856</a>     | <a href="#">Hs.536395</a> | <a href="#">DUXAP10</a>      | 14q11.1  |
| 1127 | <a href="#">BG118529</a>     | <a href="#">Hs.536633</a> | <a href="#">BG118529</a>     | 14q11.1  |
| 1128 | <a href="#">NM_005769</a>    | <a href="#">Hs.251383</a> | <a href="#">CHST4</a>        | 16q22.3  |
| 1129 | <a href="#">NM_153488</a>    | <a href="#">Hs.670781</a> | <a href="#">MAGEA2B</a>      | Xq28     |
| 1130 | <a href="#">NM_005367</a>    | <a href="#">Hs.169246</a> | <a href="#">MAGEA12</a>      | Xq28     |
| 1131 | <a href="#">NM_006546</a>    | <a href="#">Hs.144936</a> | <a href="#">IGF2BP1</a>      | 17q21.32 |
| 1132 | <a href="#">NM_153479</a>    | <a href="#">Hs.423718</a> | <a href="#">CSAG1</a>        | Xq28     |
| 1133 | <a href="#">NM_015973</a>    | <a href="#">Hs.278959</a> | <a href="#">GAL</a>          | 11q13.2  |
| 1134 | <a href="#">NM_004086</a>    | <a href="#">Hs.21016</a>  | <a href="#">COCH</a>         | 14q12    |
| 1135 | <a href="#">NM_000363</a>    | <a href="#">Hs.644596</a> | <a href="#">TNNI3</a>        | 19q13.42 |
| 1136 | <a href="#">DQ249310</a>     | <a href="#">Hs.644234</a> | <a href="#">UCA1</a>         | 19p13.12 |
| 1137 | <a href="#">NM_002704</a>    | <a href="#">Hs.2164</a>   | <a href="#">PPBP</a>         | 4q13.3   |
| 1138 | <a href="#">NM_002619</a>    | <a href="#">Hs.81564</a>  | <a href="#">PF4</a>          | 4q13.3   |
| 1139 | <a href="#">NM_004131</a>    | <a href="#">Hs.1051</a>   | <a href="#">GZMB</a>         | 14q12    |
| 1140 | <a href="#">NM_001276</a>    | <a href="#">Hs.382202</a> | <a href="#">CHI3L1</a>       | 1q32.1   |
| 1141 | <a href="#">NM_152737</a>    | <a href="#">Hs.111164</a> | <a href="#">RNF182</a>       | 6p23     |

|      |                                 |                           |                                 |          |
|------|---------------------------------|---------------------------|---------------------------------|----------|
| 1142 | <a href="#">NM_012168</a>       | <a href="#">Hs.132753</a> | <a href="#">FBXO2</a>           | 1p36.22  |
| 1143 | <a href="#">NM_198951</a>       | <a href="#">Hs.517033</a> | <a href="#">TGM2</a>            | 20q11.23 |
| 1144 | <a href="#">NM_012254</a>       | <a href="#">Hs.292177</a> | <a href="#">SLC27A5</a>         | 19q13.43 |
| 1145 | <a href="#">NM_147175</a>       | <a href="#">Hs.385956</a> | <a href="#">HS6ST2</a>          | Xq26.2   |
| 1146 | <a href="#">NM_031901</a>       | <a href="#">Hs.405880</a> | <a href="#">MRPS21</a>          | 1q21.2   |
| 1147 | <a href="#">NM_004272</a>       | <a href="#">Hs.591761</a> | <a href="#">HOMER1</a>          | 5q14.1   |
| 1148 | <a href="#">NM_006404</a>       | <a href="#">Hs.647450</a> | <a href="#">PROCR</a>           | 20q11.22 |
| 1149 | <a href="#">NM_024693</a>       | <a href="#">Hs.22242</a>  | <a href="#">ECHDC3</a>          | 10p14    |
| 1150 | <a href="#">NM_022350</a>       | <a href="#">Hs.591249</a> | <a href="#">LRAP</a>            | 5q15     |
| 1151 | <a href="#">BP871540</a>        | <a href="#">Hs.515176</a> | <a href="#">BP871540</a>        | 17p11.2  |
| 1152 | <a href="#">AL833005</a>        | <a href="#">Hs.675929</a> | <a href="#">AL833005</a>        |          |
| 1153 | <a href="#">NM_021158</a>       | <a href="#">Hs.516826</a> | <a href="#">TRIB3</a>           | 20p13    |
| 1154 | <a href="#">NM_058179</a>       | <a href="#">Hs.494261</a> | <a href="#">PSAT1</a>           | 9q21.2   |
| 1155 | <a href="#">NM_006623</a>       | <a href="#">Hs.487296</a> | <a href="#">PHGDH</a>           | 1p12     |
| 1156 | <a href="#">ENST00000357303</a> | <a href="#">Hs.24951</a>  | <a href="#">ENST00000357303</a> | 2q37.3   |
| 1157 | <a href="#">BM129308</a>        | <a href="#">Hs.653792</a> | <a href="#">BM129308</a>        | 8p21.2   |
| 1158 | <a href="#">NM_173567</a>       | <a href="#">Hs.201555</a> | <a href="#">ABHD7</a>           | 1p22.1   |
| 1159 | <a href="#">NM_032181</a>       | <a href="#">Hs.302346</a> | <a href="#">TMEM166</a>         | 2p12     |
| 1160 | <a href="#">NM_145051</a>       | <a href="#">Hs.211374</a> | <a href="#">RNF183</a>          | 9q32     |
| 1161 | <a href="#">BX107298</a>        | <a href="#">Hs.502418</a> | <a href="#">BX107298</a>        | 11p11.2  |
| 1162 | <a href="#">NM_001147</a>       | <a href="#">Hs.583870</a> | <a href="#">ANGPT2</a>          | 8p23.1   |
| 1163 | <a href="#">ENST00000309178</a> |                           | <a href="#">ENST00000309178</a> | 5q34     |
| 1164 | <a href="#">NM_002300</a>       | <a href="#">Hs.446149</a> | <a href="#">LDHB</a>            | 12p12.1  |
| 1165 | <a href="#">NM_005329</a>       | <a href="#">Hs.592069</a> | <a href="#">HAS3</a>            | 16q22.1  |
| 1166 | <a href="#">NM_033300</a>       | <a href="#">Hs.576154</a> | <a href="#">LRP8</a>            | 1p32.3   |
| 1167 | <a href="#">NM_144492</a>       | <a href="#">Hs.660278</a> | <a href="#">CLDN14</a>          | 21q22.13 |
| 1168 | <a href="#">NM_174936</a>       | <a href="#">Hs.18844</a>  | <a href="#">PCSK9</a>           | 1p32.3   |
| 1169 | <a href="#">NM_001216</a>       | <a href="#">Hs.63287</a>  | <a href="#">CA9</a>             | 9p13.3   |
| 1170 | <a href="#">NM_015715</a>       | <a href="#">Hs.149623</a> | <a href="#">PLA2G3</a>          | 22q12.2  |
| 1171 | <a href="#">BC014113</a>        | <a href="#">Hs.663029</a> | <a href="#">LOC254848</a>       | 4p16.1   |
| 1172 | <a href="#">NM_001236</a>       | <a href="#">Hs.154510</a> | <a href="#">CBR3</a>            | 21q22.12 |
| 1173 | <a href="#">NM_152450</a>       | <a href="#">Hs.531168</a> | <a href="#">FAM81A</a>          | 15q22.2  |
| 1174 | <a href="#">NM_018092</a>       | <a href="#">Hs.444046</a> | <a href="#">NETO2</a>           | 16q12.1  |
| 1175 | <a href="#">NM_139160</a>       | <a href="#">Hs.280990</a> | <a href="#">DEPDC7</a>          | 11p13    |
| 1176 | <a href="#">AB051443</a>        | <a href="#">Hs.505597</a> | <a href="#">KIAA1656</a>        | 22q12.2  |
| 1177 | <a href="#">NM_000662</a>       | <a href="#">Hs.591847</a> | <a href="#">NAT1</a>            | 8p22     |
| 1178 | <a href="#">NM_152562</a>       | <a href="#">Hs.33366</a>  | <a href="#">CDCA2</a>           | 8p21.2   |
| 1179 | <a href="#">NM_001017420</a>    | <a href="#">Hs.99480</a>  | <a href="#">ESCO2</a>           | 8p21.1   |
| 1180 | <a href="#">NM_018492</a>       | <a href="#">Hs.104741</a> | <a href="#">PBK</a>             | 8p21.1   |
| 1181 | <a href="#">XR_018387</a>       | <a href="#">Hs.646624</a> | <a href="#">LOC647298</a>       | 13q31.1  |
| 1182 | <a href="#">BC043212</a>        | <a href="#">Hs.120196</a> | <a href="#">LOC402125</a>       | 3p24.3   |
| 1183 | <a href="#">NM_145060</a>       | <a href="#">Hs.134726</a> | <a href="#">C18orf24</a>        | 18q21.1  |
| 1184 | <a href="#">ENST00000375256</a> | <a href="#">Hs.494557</a> | <a href="#">ZNF367</a>          | 9q22.32  |
| 1185 | <a href="#">NM_024094</a>       | <a href="#">Hs.315167</a> | <a href="#">DCC1</a>            | 8q24.12  |
| 1186 | <a href="#">NM_018685</a>       | <a href="#">Hs.62180</a>  | <a href="#">ANLN</a>            | 7p14.2   |
| 1187 | <a href="#">NM_001274</a>       | <a href="#">Hs.24529</a>  | <a href="#">CHEK1</a>           | 11q24.2  |
| 1188 | <a href="#">NM_003318</a>       | <a href="#">Hs.169840</a> | <a href="#">TTK</a>             | 6q14.1   |
| 1189 | <a href="#">NM_080668</a>       | <a href="#">Hs.434886</a> | <a href="#">CDCA5</a>           | 11q13.1  |
| 1190 | <a href="#">NM_001254</a>       | <a href="#">Hs.405958</a> | <a href="#">CDC6</a>            | 17q21.2  |
| 1191 | <a href="#">NM_031966</a>       | <a href="#">Hs.23960</a>  | <a href="#">CCNB1</a>           | 5q13.2   |
| 1192 | <a href="#">NM_022346</a>       | <a href="#">Hs.567567</a> | <a href="#">NCAPG</a>           | 4p15.32  |
| 1193 | <a href="#">NM_001012271</a>    | <a href="#">Hs.514527</a> | <a href="#">BIRC5</a>           | 17q25.3  |

|      |                                 |                           |                                 |          |
|------|---------------------------------|---------------------------|---------------------------------|----------|
| 1194 | <a href="#">NM_001809</a>       | <a href="#">Hs.1594</a>   | <a href="#">CENPA</a>           | 2p23.3   |
| 1195 | <a href="#">NM_018131</a>       | <a href="#">Hs.14559</a>  | <a href="#">CEP55</a>           | 10q23.33 |
| 1196 | <a href="#">NM_001786</a>       | <a href="#">Hs.334562</a> | <a href="#">CDC2</a>            | 10q21.2  |
| 1197 | <a href="#">NM_002497</a>       | <a href="#">Hs.153704</a> | <a href="#">NEK2</a>            | 1q32.3   |
| 1198 | <a href="#">NM_145697</a>       | <a href="#">Hs.651950</a> | <a href="#">NUF2</a>            | 1q23.3   |
| 1199 | <a href="#">NM_032117</a>       | <a href="#">Hs.294088</a> | <a href="#">MND1</a>            | 4q31.3   |
| 1200 | <a href="#">NM_002358</a>       | <a href="#">Hs.591697</a> | <a href="#">MAD2L1</a>          | 4q27     |
| 1201 | <a href="#">NM_001067</a>       | <a href="#">Hs.156346</a> | <a href="#">TOP2A</a>           | 17q21.2  |
| 1202 | <a href="#">A_24_P221285</a>    |                           | <a href="#">A_24_P221285</a>    | Xp11.3   |
| 1203 | <a href="#">A_32_P152696</a>    |                           | <a href="#">A_32_P152696</a>    | 9p21.3   |
| 1204 | <a href="#">BC011243</a>        | <a href="#">Hs.642598</a> | <a href="#">ZNF587</a>          | 19q13.43 |
| 1205 | <a href="#">NM_181803</a>       | <a href="#">Hs.93002</a>  | <a href="#">UBE2C</a>           | 20q13.12 |
| 1206 | <a href="#">NM_005573</a>       | <a href="#">Hs.89497</a>  | <a href="#">LMNB1</a>           | 5q23.2   |
| 1207 | <a href="#">ENST00000335534</a> | <a href="#">Hs.135094</a> | <a href="#">LOC146909</a>       | 17q21.31 |
| 1208 | <a href="#">A_32_P124773</a>    |                           | <a href="#">A_32_P124773</a>    | 3q25.31  |
| 1209 | <a href="#">BC082758</a>        | <a href="#">Hs.644701</a> | <a href="#">BC082758</a>        | 2q35     |
| 1210 | <a href="#">NM_030641</a>       | <a href="#">Hs.257352</a> | <a href="#">APOL6</a>           | 22q12.3  |
| 1211 | <a href="#">THC2598362</a>      |                           | <a href="#">THC2598362</a>      | 16p11.2  |
| 1212 | <a href="#">NM_000023</a>       | <a href="#">Hs.463412</a> | <a href="#">SGCA</a>            | 17q21.33 |
| 1213 | <a href="#">NM_015668</a>       | <a href="#">Hs.120021</a> | <a href="#">RGS22</a>           | 8q22.2   |
| 1214 | <a href="#">NM_015229</a>       | <a href="#">Hs.22616</a>  | <a href="#">KIAA0664</a>        | 17p13.3  |
| 1215 | <a href="#">BC031278</a>        | <a href="#">Hs.375797</a> | <a href="#">BC031278</a>        | 1p21.1   |
| 1216 | <a href="#">THC2739443</a>      | <a href="#">Hs.603732</a> | <a href="#">THC2739443</a>      | 2q32.1   |
| 1217 | <a href="#">NM_080621</a>       | <a href="#">Hs.27189</a>  | <a href="#">SAMD10</a>          | 20q13.33 |
| 1218 | <a href="#">NM_006439</a>       | <a href="#">Hs.584852</a> | <a href="#">MAB21L2</a>         | 4q31.3   |
| 1219 | <a href="#">AB016898</a>        | <a href="#">Hs.667982</a> | <a href="#">LOC653483</a>       | 6q27     |
| 1220 | <a href="#">NM_019060</a>       | <a href="#">Hs.110196</a> | <a href="#">CRCT1</a>           | 1q21.3   |
| 1221 | <a href="#">THC2655508</a>      |                           | <a href="#">THC2655508</a>      | 3p21.31  |
| 1222 | <a href="#">NM_024076</a>       | <a href="#">Hs.221873</a> | <a href="#">KCTD15</a>          | 19q13.11 |
| 1223 | <a href="#">AJ276555</a>        | <a href="#">Hs.152129</a> | <a href="#">AJ276555</a>        | 12q24.11 |
| 1224 | <a href="#">A_24_P289854</a>    |                           | <a href="#">A_24_P289854</a>    | 11q22.3  |
| 1225 | <a href="#">AF264625</a>        | <a href="#">Hs.675021</a> | <a href="#">AF264625</a>        | 10q24.32 |
| 1226 | <a href="#">A_24_P934306</a>    |                           | <a href="#">A_24_P934306</a>    | 1q32.1   |
| 1227 | <a href="#">NM_052999</a>       | <a href="#">Hs.15159</a>  | <a href="#">CMTM1</a>           | 16q21    |
| 1228 | <a href="#">AA417913</a>        | <a href="#">Hs.87889</a>  | <a href="#">AA417913</a>        | 14q32.13 |
| 1229 | <a href="#">ENST00000331096</a> |                           | <a href="#">ENST00000331096</a> | 12q24.11 |
| 1230 | <a href="#">NM_005309</a>       | <a href="#">Hs.103502</a> | <a href="#">GPT</a>             | 8q24.3   |
| 1231 | <a href="#">NM_014507</a>       | <a href="#">Hs.349111</a> | <a href="#">MCAT</a>            | 22q13.2  |
| 1232 | <a href="#">NM_145659</a>       | <a href="#">Hs.528111</a> | <a href="#">IL27</a>            | 16p11.2  |
| 1233 | <a href="#">NM_173502</a>       | <a href="#">Hs.256632</a> | <a href="#">PRSS36</a>          | 16p11.2  |
| 1234 | <a href="#">A_24_P752362</a>    |                           | <a href="#">A_24_P752362</a>    | 8p23.1   |
| 1235 | <a href="#">ENST00000307662</a> | <a href="#">Hs.654723</a> | <a href="#">SYNPO</a>           | 5q33.1   |
| 1236 | <a href="#">ENST00000344415</a> | <a href="#">Hs.677674</a> | <a href="#">LOC400581</a>       | 17p11.2  |
| 1237 | <a href="#">XR_018043</a>       | <a href="#">Hs.646473</a> | <a href="#">LOC442308</a>       | 7p11.2   |
| 1238 | <a href="#">NM_001004313</a>    | <a href="#">Hs.462230</a> | <a href="#">LOC388335</a>       | 17p13.1  |
| 1239 | <a href="#">NM_000204</a>       | <a href="#">Hs.312485</a> | <a href="#">CFI</a>             | 4q25     |
| 1240 | <a href="#">ENST00000301171</a> | <a href="#">Hs.250615</a> | <a href="#">ENST00000301171</a> | 19q13.2  |
| 1241 | <a href="#">ENST00000342584</a> | <a href="#">Hs.481464</a> | <a href="#">ENST00000342584</a> | 5p15.33  |
| 1242 | <a href="#">NM_152997</a>       | <a href="#">Hs.320147</a> | <a href="#">C4orf7</a>          | 4q13.3   |
| 1243 | <a href="#">NM_001192</a>       | <a href="#">Hs.2556</a>   | <a href="#">TNFRSF17</a>        | 16p13.13 |
| 1244 | <a href="#">BC107852</a>        | <a href="#">Hs.449585</a> | <a href="#">BC107852</a>        | 22q11.22 |
| 1245 | <a href="#">CD709370</a>        | <a href="#">Hs.559369</a> | <a href="#">CD709370</a>        | 22q11.22 |

|      |                                 |                           |                                 |          |
|------|---------------------------------|---------------------------|---------------------------------|----------|
| 1246 | <a href="#">ENST00000390256</a> | <a href="#">Hs.570141</a> | <a href="#">ENST00000390256</a> | 2p11.2   |
| 1247 | <a href="#">A_24_P930327</a>    |                           | <a href="#">A_24_P930327</a>    | 19q13.2  |
| 1248 | <a href="#">ENST00000390559</a> | <a href="#">Hs.510635</a> | <a href="#">ENST00000390559</a> | 14q32.33 |
| 1249 | <a href="#">ENST00000283694</a> | <a href="#">Hs.458446</a> | <a href="#">ENST00000283694</a> | 15q11.2  |
| 1250 | <a href="#">AK026408</a>        | <a href="#">Hs.449601</a> | <a href="#">AK026408</a>        | 22q11.22 |
| 1251 | <a href="#">ENST00000390625</a> | <a href="#">Hs.631480</a> | <a href="#">ENST00000390625</a> | 14q32.33 |
| 1252 | <a href="#">NM_001995</a>       | <a href="#">Hs.406678</a> | <a href="#">ACSL1</a>           | 4q35.1   |
| 1253 | <a href="#">BQ880155</a>        | <a href="#">Hs.604483</a> | <a href="#">BQ880155</a>        | 10q11.23 |
| 1254 | <a href="#">A_23_P72330</a>     |                           | <a href="#">A_23_P72330</a>     |          |
| 1255 | <a href="#">BC063599</a>        | <a href="#">Hs.449621</a> | <a href="#">IGKV2-24</a>        | 2p11.2   |
| 1256 | <a href="#">A_24_P384604</a>    |                           | <a href="#">A_24_P384604</a>    | 2q11.2   |
| 1257 | <a href="#">ENST00000390260</a> | <a href="#">Hs.449621</a> | <a href="#">ENST00000390260</a> | 2p11.2   |
| 1258 | <a href="#">BC034142</a>        | <a href="#">Hs.449621</a> | <a href="#">IGKV1-5</a>         | 2p11.2   |
| 1259 | <a href="#">ENST00000390267</a> | <a href="#">Hs.449609</a> | <a href="#">ENST00000390267</a> | 2p11.2   |
| 1260 | <a href="#">ENST00000327926</a> | <a href="#">Hs.525894</a> | <a href="#">ENST00000327926</a> | 22q11.1  |
| 1261 | <a href="#">A_24_P203886</a>    |                           | <a href="#">A_24_P203886</a>    | 2q11.2   |
| 1262 | <a href="#">ENST00000312946</a> |                           | <a href="#">ENST00000312946</a> | 2p11.2   |
| 1263 | <a href="#">THC2497143</a>      | <a href="#">Hs.449585</a> | <a href="#">THC2497143</a>      | 22q11.22 |
| 1264 | <a href="#">ENST00000390312</a> | <a href="#">Hs.449585</a> | <a href="#">ENST00000390312</a> | 22q11.22 |
| 1265 | <a href="#">ENST00000390294</a> | <a href="#">Hs.655198</a> | <a href="#">ENST00000390294</a> | 22q11.22 |
| 1266 | <a href="#">BC012876</a>        | <a href="#">Hs.449585</a> | <a href="#">BC012876</a>        | 22q11.22 |
| 1267 | <a href="#">BC023973</a>        | <a href="#">Hs.535668</a> | <a href="#">IGLV6-57</a>        | 22q11.22 |
| 1268 | <a href="#">A_23_P159163</a>    |                           | <a href="#">A_23_P159163</a>    |          |
| 1269 | <a href="#">A_23_P84791</a>     |                           | <a href="#">A_23_P84791</a>     |          |
| 1270 | <a href="#">AY998685</a>        | <a href="#">Hs.652878</a> | <a href="#">AY998685</a>        |          |
| 1271 | <a href="#">ENST00000390243</a> | <a href="#">Hs.652878</a> | <a href="#">ENST00000390243</a> | 2p11.2   |
| 1272 | <a href="#">NM_021181</a>       | <a href="#">Hs.517265</a> | <a href="#">SLAMF7</a>          | 1q23.3   |
| 1273 | <a href="#">AF063695</a>        | <a href="#">Hs.449585</a> | <a href="#">AF063695</a>        |          |
| 1274 | <a href="#">A_23_P72252</a>     |                           | <a href="#">A_23_P72252</a>     |          |
| 1275 | <a href="#">X57802</a>          | <a href="#">Hs.449585</a> | <a href="#">X57802</a>          | 22q11.22 |
| 1276 | <a href="#">NM_198440</a>       | <a href="#">Hs.593679</a> | <a href="#">DERL3</a>           | 22q11.23 |
| 1277 | <a href="#">X57818</a>          | <a href="#">Hs.449585</a> | <a href="#">X57818</a>          | 22q11.22 |
| 1278 | <a href="#">AF035035</a>        | <a href="#">Hs.574701</a> | <a href="#">IGKV1D-8</a>        | 2p11.2   |
| 1279 | <a href="#">NM_006235</a>       | <a href="#">Hs.654525</a> | <a href="#">POU2AF1</a>         | 11q23.1  |
| 1280 | <a href="#">AF267875</a>        | <a href="#">Hs.535668</a> | <a href="#">AF267875</a>        | 22q11.22 |
| 1281 | <a href="#">X01147</a>          | <a href="#">Hs.654512</a> | <a href="#">X01147</a>          | 22q11.22 |
| 1282 | <a href="#">A_23_P61068</a>     |                           | <a href="#">A_23_P61068</a>     |          |
| 1283 | <a href="#">AJ399872</a>        | <a href="#">Hs.449621</a> | <a href="#">AJ399872</a>        |          |
| 1284 | <a href="#">ENST00000390595</a> | <a href="#">Hs.510635</a> | <a href="#">ENST00000390595</a> | 14q32.33 |
| 1285 | <a href="#">AJ252276</a>        | <a href="#">Hs.510635</a> | <a href="#">AJ252276</a>        | 2q11.1   |
| 1286 | <a href="#">A_23_P113056</a>    |                           | <a href="#">A_23_P113056</a>    | 14q32.33 |
| 1287 | <a href="#">BC070333</a>        | <a href="#">Hs.634941</a> | <a href="#">IGHV1-69</a>        | 14q32.33 |
| 1288 | <a href="#">ENST00000390610</a> | <a href="#">Hs.644810</a> | <a href="#">ENST00000390610</a> | 14q32.33 |
| 1289 | <a href="#">ENST00000390622</a> | <a href="#">Hs.644810</a> | <a href="#">ENST00000390622</a> | 14q32.33 |
| 1290 | <a href="#">NM_002281</a>       | <a href="#">Hs.658118</a> | <a href="#">KRT81</a>           | 12q13.13 |
| 1291 | <a href="#">A_24_P204574</a>    |                           | <a href="#">A_24_P204574</a>    | 22q11.22 |
| 1292 | <a href="#">A_23_P112957</a>    |                           | <a href="#">A_23_P112957</a>    | 22q11.22 |
| 1293 | <a href="#">AF076205</a>        | <a href="#">Hs.449574</a> | <a href="#">AF076205</a>        | 22q11.22 |
| 1294 | <a href="#">BC009479</a>        |                           | <a href="#">ITLL3</a>           | 3p25.3   |
| 1295 | <a href="#">NM_016459</a>       | <a href="#">Hs.409563</a> | <a href="#">MGC29506</a>        | 5q31.2   |
| 1296 | <a href="#">BI521983</a>        | <a href="#">Hs.449574</a> | <a href="#">ARPC1B</a>          | 22q11.22 |
| 1297 | <a href="#">ENST00000328419</a> |                           | <a href="#">ENST00000328419</a> | 18p11.31 |

|      |                                 |                           |                                 |          |
|------|---------------------------------|---------------------------|---------------------------------|----------|
| 1298 | <a href="#">A_23_P435390</a>    |                           | <a href="#">A_23_P435390</a>    |          |
| 1299 | <a href="#">AY172962</a>        | <a href="#">Hs.449585</a> | <a href="#">AY172962</a>        | 22q11.22 |
| 1300 | <a href="#">NM_001013618</a>    | <a href="#">Hs.567636</a> | <a href="#">CTA-246H3.1</a>     | 22q11.23 |
| 1301 | <a href="#">NM_020070</a>       | <a href="#">Hs.348935</a> | <a href="#">IGLL1</a>           | 22q11.23 |
| 1302 | <a href="#">BC024289</a>        | <a href="#">Hs.510635</a> | <a href="#">IFI6</a>            | 14q32.33 |
| 1303 | <a href="#">ENST00000390543</a> | <a href="#">Hs.510635</a> | <a href="#">ENST00000390543</a> | 14q32.33 |
| 1304 | <a href="#">ENST00000390630</a> | <a href="#">Hs.643624</a> | <a href="#">ENST00000390630</a> | 14q32.33 |
| 1305 | <a href="#">A_23_P158868</a>    |                           | <a href="#">A_23_P158868</a>    |          |
| 1306 | <a href="#">AJ245002</a>        | <a href="#">Hs.631647</a> | <a href="#">AJ245002</a>        | 15q11.2  |
| 1307 | <a href="#">AF067420</a>        | <a href="#">Hs.648398</a> | <a href="#">IGHA1</a>           | 14q32.33 |
| 1308 | <a href="#">AY003763</a>        | <a href="#">Hs.510635</a> | <a href="#">AY003763</a>        |          |
| 1309 | <a href="#">ENST00000390636</a> | <a href="#">Hs.547404</a> | <a href="#">ENST00000390636</a> | 14q32.33 |
| 1310 | <a href="#">A_24_P323298</a>    |                           | <a href="#">A_24_P323298</a>    | 14q32.33 |
| 1311 | <a href="#">AF103312</a>        | <a href="#">Hs.547404</a> | <a href="#">AF103312</a>        | 14q32.33 |
| 1312 | <a href="#">A_24_P110487</a>    |                           | <a href="#">A_24_P110487</a>    | 16p11.2  |
| 1313 | <a href="#">AB063751</a>        | <a href="#">Hs.533963</a> | <a href="#">AB063751</a>        | 14q32.33 |
| 1314 | <a href="#">BX640624</a>        | <a href="#">Hs.648398</a> | <a href="#">IGHA1</a>           | 14q32.33 |
| 1315 | <a href="#">AF471475</a>        |                           | <a href="#">AF471475</a>        | 14q32.33 |
| 1316 | <a href="#">ENST00000390615</a> | <a href="#">Hs.633485</a> | <a href="#">ENST00000390615</a> | 14q32.33 |
| 1317 | <a href="#">Y11328</a>          | <a href="#">Hs.650507</a> | <a href="#">Y11328</a>          | 16p11.2  |
| 1318 | <a href="#">AF471454</a>        | <a href="#">Hs.633485</a> | <a href="#">AF471454</a>        | 14q32.33 |
| 1319 | <a href="#">ENST00000360102</a> |                           | <a href="#">ENST00000360102</a> | 16p11.2  |
| 1320 | <a href="#">A_24_P384119</a>    |                           | <a href="#">A_24_P384119</a>    | 16p11.2  |
| 1321 | <a href="#">ENST00000390632</a> | <a href="#">Hs.644810</a> | <a href="#">ENST00000390632</a> | 14q32.33 |
| 1322 | <a href="#">AJ519285</a>        | <a href="#">Hs.551925</a> | <a href="#">AJ519285</a>        | 14q32.33 |
| 1323 | <a href="#">EF178107</a>        | <a href="#">Hs.644810</a> | <a href="#">EF178107</a>        | 14q32.33 |
| 1324 | <a href="#">NP109842</a>        |                           | <a href="#">NP109842</a>        | 16p11.2  |
| 1325 | <a href="#">ENST00000390624</a> | <a href="#">Hs.644810</a> | <a href="#">ENST00000390624</a> | 14q32.33 |
| 1326 | <a href="#">A_24_P161853</a>    |                           | <a href="#">A_24_P161853</a>    | 16p11.2  |
| 1327 | <a href="#">ENST00000390609</a> | <a href="#">Hs.510635</a> | <a href="#">ENST00000390609</a> | 14q32.33 |
| 1328 | <a href="#">AK128476</a>        | <a href="#">Hs.648398</a> | <a href="#">IGHA1</a>           | 14q32.33 |
| 1329 | <a href="#">NM_012390</a>       | <a href="#">Hs.651168</a> | <a href="#">SMR3A</a>           | 4q13.3   |
| 1330 | <a href="#">THC2699069</a>      |                           | <a href="#">THC2699069</a>      | 17q21.31 |
| 1331 | <a href="#">BC073764</a>        | <a href="#">Hs.449621</a> | <a href="#">IGKC</a>            | 2p11.2   |
| 1332 | <a href="#">BC032451</a>        | <a href="#">Hs.449621</a> | <a href="#">BC032451</a>        | 2p11.2   |
| 1333 | <a href="#">AY062331</a>        | <a href="#">Hs.449621</a> | <a href="#">AY062331</a>        | 2p11.2   |
| 1334 | <a href="#">BC008026</a>        | <a href="#">Hs.676121</a> | <a href="#">MGC16025</a>        | 2q37.3   |
| 1335 | <a href="#">BX110985</a>        | <a href="#">Hs.143004</a> | <a href="#">BX110985</a>        | 3p25.3   |
| 1336 | <a href="#">ENST00000390263</a> | <a href="#">Hs.693601</a> | <a href="#">ENST00000390263</a> | 2p11.2   |
| 1337 | <a href="#">ENST00000390253</a> | <a href="#">Hs.649954</a> | <a href="#">ENST00000390253</a> | 2p11.2   |
| 1338 | <a href="#">ENST00000390261</a> | <a href="#">Hs.693601</a> | <a href="#">ENST00000390261</a> | 2p11.2   |
| 1339 | <a href="#">ENST00000310579</a> |                           | <a href="#">ENST00000310579</a> | 9q12     |
| 1340 | <a href="#">ENST00000331696</a> |                           | <a href="#">ENST00000331696</a> | 2p11.1   |
| 1341 | <a href="#">BC067092</a>        | <a href="#">Hs.449621</a> | <a href="#">IGKC</a>            | 2p11.2   |
| 1342 | <a href="#">A_24_P490109</a>    |                           | <a href="#">A_24_P490109</a>    | 9q12     |
| 1343 | <a href="#">BC030813</a>        | <a href="#">Hs.449621</a> | <a href="#">BC030813</a>        | 2p11.2   |
| 1344 | <a href="#">ENST00000390281</a> | <a href="#">Hs.449621</a> | <a href="#">ENST00000390281</a> | 2p11.2   |
| 1345 | <a href="#">BC095489</a>        | <a href="#">Hs.449621</a> | <a href="#">IGKC</a>            | 2p11.2   |
| 1346 | <a href="#">ENST00000390275</a> | <a href="#">Hs.390427</a> | <a href="#">ENST00000390275</a> | 2p11.2   |
| 1347 | <a href="#">A_23_P44053</a>     |                           | <a href="#">A_23_P44053</a>     | 2p11.2   |
| 1348 | <a href="#">ENST00000390258</a> | <a href="#">Hs.693601</a> | <a href="#">ENST00000390258</a> | 2p11.2   |
| 1349 | <a href="#">ENST00000390271</a> |                           | <a href="#">ENST00000390271</a> | 2p11.2   |

|      |                                 |                           |                                 |          |
|------|---------------------------------|---------------------------|---------------------------------|----------|
| 1350 | <a href="#">A_24_P413286</a>    |                           | <a href="#">A_24_P413286</a>    |          |
| 1351 | <a href="#">ENST00000360329</a> | <a href="#">Hs.649259</a> | <a href="#">ENST00000360329</a> | 14q32.33 |
| 1352 | <a href="#">NM_152513</a>       | <a href="#">Hs.116419</a> | <a href="#">RP5-821D11.2</a>    | 22q13.2  |
| 1353 | <a href="#">BC022362</a>        | <a href="#">Hs.449621</a> | <a href="#">BC022362</a>        | 2p11.2   |
| 1354 | <a href="#">NM_004944</a>       | <a href="#">Hs.476453</a> | <a href="#">DNASE1L3</a>        | 3p14.3   |
| 1355 | <a href="#">NM_144646</a>       | <a href="#">Hs.643431</a> | <a href="#">IGJ</a>             | 4q13.3   |
| 1356 | <a href="#">AW136683</a>        | <a href="#">Hs.643431</a> | <a href="#">AW136683</a>        | 4q13.3   |
| 1357 | <a href="#">ENST00000390539</a> | <a href="#">Hs.648398</a> | <a href="#">ENST00000390539</a> | 14q32.33 |
| 1358 | <a href="#">AF343666</a>        | <a href="#">Hs.648398</a> | <a href="#">AF343666</a>        | 1q23.1   |
| 1359 | <a href="#">NM_153259</a>       | <a href="#">Hs.591446</a> | <a href="#">MCOLN2</a>          | 1p22.3   |
| 1360 | <a href="#">NM_018284</a>       | <a href="#">Hs.656774</a> | <a href="#">GBP3</a>            | 1p22.2   |
| 1361 | <a href="#">NM_018974</a>       | <a href="#">Hs.567508</a> | <a href="#">UNC93A</a>          | 6q27     |
| 1362 | <a href="#">THC2520542</a>      |                           | <a href="#">THC2520542</a>      | 5q23.1   |
| 1363 | <a href="#">NM_001080535</a>    | <a href="#">Hs.149219</a> | <a href="#">LINCR</a>           | 2q11.2   |
| 1364 | <a href="#">NM_017662</a>       | <a href="#">Hs.272225</a> | <a href="#">TRPM6</a>           | 9q21.13  |
| 1365 | <a href="#">THC2709754</a>      |                           | <a href="#">THC2709754</a>      | 13q14.11 |
| 1366 | <a href="#">NM_001353</a>       | <a href="#">Hs.460260</a> | <a href="#">AKR1C1</a>          | 10p15.1  |
| 1367 | <a href="#">NM_003739</a>       | <a href="#">Hs.78183</a>  | <a href="#">AKR1C3</a>          | 10p15.1  |
| 1368 | <a href="#">BC040210</a>        | <a href="#">Hs.460260</a> | <a href="#">AKR1C1</a>          | 10p15.1  |
| 1369 | <a href="#">ENST00000377116</a> | <a href="#">Hs.525093</a> | <a href="#">ENST00000377116</a> | 13q31.1  |
| 1370 | <a href="#">NM_033255</a>       | <a href="#">Hs.546467</a> | <a href="#">EPST1</a>           | 13q14.11 |
| 1371 | <a href="#">ENST00000313624</a> | <a href="#">Hs.546467</a> | <a href="#">EPST1</a>           | 13q14.11 |
| 1372 | <a href="#">NM_020208</a>       | <a href="#">Hs.413095</a> | <a href="#">SLC6A20</a>         | 3p21.31  |
| 1373 | <a href="#">NM_000253</a>       | <a href="#">Hs.195799</a> | <a href="#">MTTP</a>            | 4q23     |
| 1374 | <a href="#">NM_080860</a>       | <a href="#">Hs.661069</a> | <a href="#">TSGA2</a>           | 21q22.3  |
| 1375 | <a href="#">NM_138809</a>       | <a href="#">Hs.192586</a> | <a href="#">CMBL</a>            | 5p15.2   |
| 1376 | <a href="#">NM_021147</a>       | <a href="#">Hs.3041</a>   | <a href="#">CCNU</a>            | 5q11.2   |
| 1377 | <a href="#">NM_018670</a>       | <a href="#">Hs.447531</a> | <a href="#">MESP1</a>           | 15q26.1  |
| 1378 | <a href="#">AL832534</a>        | <a href="#">Hs.684035</a> | <a href="#">AL832534</a>        | 2p22.1   |
| 1379 | <a href="#">A_24_P358606</a>    |                           | <a href="#">A_24_P358606</a>    | 5q32     |
| 1380 | <a href="#">S73202</a>          |                           | <a href="#">S73202</a>          | 9q34.11  |
| 1381 | <a href="#">THC2786072</a>      |                           | <a href="#">THC2786072</a>      | 7q31.1   |
| 1382 | <a href="#">XR_019510</a>       | <a href="#">Hs.650952</a> | <a href="#">LOC652810</a>       | Yq11.21  |
| 1383 | <a href="#">NM_002288</a>       | <a href="#">Hs.43803</a>  | <a href="#">LAIR2</a>           | 19q13.42 |
| 1384 | <a href="#">NM_001710</a>       | <a href="#">Hs.69771</a>  | <a href="#">CFB</a>             | 6p21.32  |
| 1385 | <a href="#">NM_006498</a>       | <a href="#">Hs.531776</a> | <a href="#">LGALS2</a>          | 22q13.1  |
| 1386 | <a href="#">NM_031409</a>       | <a href="#">Hs.46468</a>  | <a href="#">CCR6</a>            | 6q27     |
| 1387 | <a href="#">NM_000625</a>       | <a href="#">Hs.434386</a> | <a href="#">NOS2A</a>           | 17q11.1  |
| 1388 | <a href="#">NM_002426</a>       | <a href="#">Hs.1695</a>   | <a href="#">MMP12</a>           | 11q22.2  |
| 1389 | <a href="#">NM_033292</a>       | <a href="#">Hs.2490</a>   | <a href="#">CASP1</a>           | 11q22.3  |
| 1390 | <a href="#">NM_016434</a>       | <a href="#">Hs.434878</a> | <a href="#">RTEL1</a>           | 20q13.33 |
| 1391 | <a href="#">BC004960</a>        | <a href="#">Hs.516108</a> | <a href="#">MGC10955</a>        | 2p13.1   |
| 1392 | <a href="#">NM_032945</a>       | <a href="#">Hs.434878</a> | <a href="#">TNFRSF6B</a>        | 20q13.33 |
| 1393 | <a href="#">NM_145252</a>       | <a href="#">Hs.105887</a> | <a href="#">LOC124220</a>       | 16p13.3  |
| 1394 | <a href="#">NM_001080494</a>    | <a href="#">Hs.112949</a> | <a href="#">C1orf34</a>         | 1p32.3   |
| 1395 | <a href="#">NM_148672</a>       | <a href="#">Hs.656904</a> | <a href="#">CCL28</a>           | 5p12     |
| 1396 | <a href="#">NM_002644</a>       | <a href="#">Hs.497589</a> | <a href="#">PIGR</a>            | 1q32.1   |
| 1397 | <a href="#">THC2591546</a>      | <a href="#">Hs.497589</a> | <a href="#">THC2591546</a>      | 1q32.1   |
| 1398 | <a href="#">NM_014080</a>       | <a href="#">Hs.71377</a>  | <a href="#">DUOX2</a>           | 15q21.1  |
| 1399 | <a href="#">NM_005564</a>       | <a href="#">Hs.204238</a> | <a href="#">LCN2</a>            | 9q34.11  |
| 1400 | <a href="#">BC029479</a>        | <a href="#">Hs.525513</a> | <a href="#">LOC283587</a>       | 14q31.3  |
| 1401 | <a href="#">NM_024780</a>       | <a href="#">Hs.115838</a> | <a href="#">TMC5</a>            | 16p12.3  |

|      |                              |                           |                              |          |
|------|------------------------------|---------------------------|------------------------------|----------|
| 1402 | <a href="#">NM_005764</a>    | <a href="#">Hs.431099</a> | <a href="#">PDZK1IP1</a>     | 1p33     |
| 1403 | <a href="#">NM_022154</a>    | <a href="#">Hs.288034</a> | <a href="#">SLC39A8</a>      | 4q24     |
| 1404 | <a href="#">NM_032744</a>    | <a href="#">Hs.126409</a> | <a href="#">C6orf105</a>     | 6p24.1   |
| 1405 | <a href="#">NM_000715</a>    | <a href="#">Hs.1012</a>   | <a href="#">C4BPA</a>        | 1q32.2   |
| 1406 | <a href="#">NM_001719</a>    | <a href="#">Hs.473163</a> | <a href="#">BMP7</a>         | 20q13.31 |
| 1407 | <a href="#">NM_002165</a>    | <a href="#">Hs.504609</a> | <a href="#">ID1</a>          | 20q11.21 |
| 1408 | <a href="#">CN479126</a>     | <a href="#">Hs.504609</a> | <a href="#">CN479126</a>     | 20q11.21 |
| 1409 | <a href="#">NM_000681</a>    | <a href="#">Hs.249159</a> | <a href="#">ADRA2A</a>       | 10q25.2  |
| 1410 | <a href="#">NM_006829</a>    | <a href="#">Hs.642660</a> | <a href="#">C10orf116</a>    | 10q23.2  |
| 1411 | <a href="#">NM_000494</a>    | <a href="#">Hs.117938</a> | <a href="#">COL17A1</a>      | 10q25.1  |
| 1412 | <a href="#">NM_001003395</a> | <a href="#">Hs.591347</a> | <a href="#">TPD52L1</a>      | 6q22.31  |
| 1413 | <a href="#">NM_144696</a>    | <a href="#">Hs.658505</a> | <a href="#">C1orf125</a>     | 1q25.2   |
| 1414 | <a href="#">NM_183393</a>    | <a href="#">Hs.654933</a> | <a href="#">CADPS</a>        | 3p14.2   |
| 1415 | <a href="#">BI836406</a>     | <a href="#">Hs.130203</a> | <a href="#">BI836406</a>     | 4q22.1   |
| 1416 | <a href="#">AK090515</a>     | <a href="#">Hs.181297</a> | <a href="#">LOC283663</a>    | 15q21.3  |
| 1417 | <a href="#">NM_014859</a>    | <a href="#">Hs.499758</a> | <a href="#">KIAA0672</a>     | 17p12    |
| 1418 | <a href="#">NM_001823</a>    | <a href="#">Hs.173724</a> | <a href="#">CKB</a>          | 14q32.33 |
| 1419 | <a href="#">A_24_P538328</a> |                           | <a href="#">A_24_P538328</a> | 16q11.2  |
| 1420 | <a href="#">NM_025163</a>    | <a href="#">Hs.518403</a> | <a href="#">PIGZ</a>         | 3q29     |
| 1421 | <a href="#">AK023526</a>     | <a href="#">Hs.670477</a> | <a href="#">AK023526</a>     | 4q22.1   |
| 1422 | <a href="#">NM_015957</a>    | <a href="#">Hs.447794</a> | <a href="#">APIP</a>         | 11p13    |
| 1423 | <a href="#">A_24_P170203</a> |                           | <a href="#">A_24_P170203</a> | 9q31.2   |
| 1424 | <a href="#">NM_020997</a>    | <a href="#">Hs.656214</a> | <a href="#">LEFTY1</a>       | 1q42.12  |
| 1425 | <a href="#">NM_080818</a>    | <a href="#">Hs.352218</a> | <a href="#">OXGR1</a>        | 13q32.1  |
| 1426 | <a href="#">NM_001482</a>    | <a href="#">Hs.75335</a>  | <a href="#">GATM</a>         | 15q21.1  |
| 1427 | <a href="#">THC2687713</a>   |                           | <a href="#">THC2687713</a>   | 4q33     |
| 1428 | <a href="#">NM_019000</a>    | <a href="#">Hs.481704</a> | <a href="#">FAM134B</a>      | 5p15.1   |
| 1429 | <a href="#">THC2675062</a>   |                           | <a href="#">THC2675062</a>   | 2q24.3   |
| 1430 | <a href="#">NM_194298</a>    | <a href="#">Hs.499709</a> | <a href="#">SLC16A9</a>      | 10q21.1  |
| 1431 | <a href="#">NM_006834</a>    | <a href="#">Hs.287714</a> | <a href="#">RAB32</a>        | 6q24.3   |
| 1432 | <a href="#">NM_207578</a>    | <a href="#">Hs.487325</a> | <a href="#">PRKACB</a>       | 1p31.1   |
| 1433 | <a href="#">NM_001010971</a> | <a href="#">Hs.591445</a> | <a href="#">SAMD13</a>       | 1p31.1   |
| 1434 | <a href="#">NM_001077</a>    | <a href="#">Hs.575083</a> | <a href="#">UGT2B17</a>      | 4q13.2   |
| 1435 | <a href="#">NM_001076</a>    | <a href="#">Hs.651166</a> | <a href="#">UGT2B15</a>      | 4q13.2   |
| 1436 | <a href="#">A_24_P575267</a> |                           | <a href="#">A_24_P575267</a> | 4q13.2   |
| 1437 | <a href="#">NM_001073</a>    | <a href="#">Hs.339811</a> | <a href="#">UGT2B11</a>      | 4q13.2   |
| 1438 | <a href="#">NM_001075</a>    | <a href="#">Hs.201634</a> | <a href="#">UGT2B10</a>      | 4q13.2   |
| 1439 | <a href="#">NM_001074</a>    | <a href="#">Hs.654424</a> | <a href="#">UGT2B7</a>       | 4q13.2   |
| 1440 | <a href="#">NM_053039</a>    | <a href="#">Hs.653154</a> | <a href="#">UGT2B28</a>      | 4q13.2   |
| 1441 | <a href="#">NM_153699</a>    | <a href="#">Hs.553652</a> | <a href="#">GSTA5</a>        | 6p12.1   |
| 1442 | <a href="#">BC064586</a>     | <a href="#">Hs.410126</a> | <a href="#">LOC145837</a>    | 15q24.1  |
| 1443 | <a href="#">NM_004212</a>    | <a href="#">Hs.367833</a> | <a href="#">SLC28A2</a>      | 15q21.1  |
| 1444 | <a href="#">NM_153486</a>    | <a href="#">Hs.380929</a> | <a href="#">LDHD</a>         | 16q23.1  |
| 1445 | <a href="#">NM_170601</a>    | <a href="#">Hs.10056</a>  | <a href="#">SIAE</a>         | 11q24.2  |
| 1446 | <a href="#">BC063383</a>     | <a href="#">Hs.306721</a> | <a href="#">LOC400573</a>    | 17p13.1  |
| 1447 | <a href="#">NM_031264</a>    | <a href="#">Hs.165619</a> | <a href="#">MUPCDH</a>       | 11p15.5  |
| 1448 | <a href="#">NM_016341</a>    | <a href="#">Hs.655033</a> | <a href="#">PLCE1</a>        | 10q23.33 |
| 1449 | <a href="#">NM_080489</a>    | <a href="#">Hs.657015</a> | <a href="#">SDCBP2</a>       | 20p13    |
| 1450 | <a href="#">A_32_P218707</a> |                           | <a href="#">A_32_P218707</a> | 2p11.2   |
| 1451 | <a href="#">NM_002842</a>    | <a href="#">Hs.179770</a> | <a href="#">PTPRH</a>        | 19q13.42 |
| 1452 | <a href="#">NM_005629</a>    | <a href="#">Hs.540696</a> | <a href="#">SLC6A8</a>       | Xq28     |
| 1453 | <a href="#">NM_024307</a>    | <a href="#">Hs.289015</a> | <a href="#">GDPD3</a>        | 16p11.2  |

|      |                              |                           |                              |          |
|------|------------------------------|---------------------------|------------------------------|----------|
| 1454 | <a href="#">BC103878</a>     | <a href="#">Hs.288568</a> | <a href="#">MOGAT2</a>       | 11q13.5  |
| 1455 | <a href="#">NM_181795</a>    | <a href="#">Hs.486354</a> | <a href="#">PKIB</a>         | 6q22.31  |
| 1456 | <a href="#">NM_005771</a>    | <a href="#">Hs.179608</a> | <a href="#">DHRS9</a>        | 2q31.1   |
| 1457 | <a href="#">AK026328</a>     | <a href="#">Hs.232604</a> | <a href="#">FLJ22675</a>     | 11q13.1  |
| 1458 | <a href="#">NM_033128</a>    | <a href="#">Hs.655515</a> | <a href="#">SCIN</a>         | 7p21.3   |
| 1459 | <a href="#">NM_000860</a>    | <a href="#">Hs.655491</a> | <a href="#">HPGD</a>         | 4q34.1   |
| 1460 | <a href="#">NM_019010</a>    | <a href="#">Hs.84905</a>  | <a href="#">KRT20</a>        | 17q21.2  |
| 1461 | <a href="#">NM_007072</a>    | <a href="#">Hs.252351</a> | <a href="#">HHLA2</a>        | 3q13.13  |
| 1462 | <a href="#">AF088076</a>     | <a href="#">Hs.445045</a> | <a href="#">AF088076</a>     | 1q23.2   |
| 1463 | <a href="#">NM_015328</a>    | <a href="#">Hs.600789</a> | <a href="#">KIAA0828</a>     | 7q32.1   |
| 1464 | <a href="#">NM_020299</a>    | <a href="#">Hs.116724</a> | <a href="#">AKR1B10</a>      | 7q33     |
| 1465 | <a href="#">XR_018726</a>    | <a href="#">Hs.646726</a> | <a href="#">LOC340888</a>    | 10q21.3  |
| 1466 | <a href="#">NM_197975</a>    | <a href="#">Hs.225949</a> | <a href="#">BTNL3</a>        | 5q35.3   |
| 1467 | <a href="#">NM_024850</a>    | <a href="#">Hs.189109</a> | <a href="#">BTNL8</a>        | 5q35.3   |
| 1468 | <a href="#">NM_032321</a>    | <a href="#">Hs.389311</a> | <a href="#">MGC13057</a>     | 2q32.2   |
| 1469 | <a href="#">NM_002153</a>    | <a href="#">Hs.162795</a> | <a href="#">HSD17B2</a>      | 16q23.3  |
| 1470 | <a href="#">NM_001041</a>    | <a href="#">Hs.429596</a> | <a href="#">SI</a>           | 3q26.1   |
| 1471 | <a href="#">NM_000035</a>    | <a href="#">Hs.530274</a> | <a href="#">ALDOB</a>        | 9q31.1   |
| 1472 | <a href="#">NM_024803</a>    | <a href="#">Hs.163079</a> | <a href="#">TUBAL3</a>       | 10p15.1  |
| 1473 | <a href="#">NM_198998</a>    | <a href="#">Hs.534650</a> | <a href="#">AQP12A</a>       | 2q37.3   |
| 1474 | <a href="#">CR749831</a>     | <a href="#">Hs.282795</a> | <a href="#">CR749831</a>     | 10q11.23 |
| 1475 | <a href="#">NM_175873</a>    | <a href="#">Hs.13308</a>  | <a href="#">ANKRD43</a>      | 5q31.1   |
| 1476 | <a href="#">NM_005588</a>    | <a href="#">Hs.179704</a> | <a href="#">MEP1A</a>        | 6p12.3   |
| 1477 | <a href="#">NM_012338</a>    | <a href="#">Hs.16529</a>  | <a href="#">TSPAN12</a>      | 7q31.31  |
| 1478 | <a href="#">NM_004063</a>    | <a href="#">Hs.591853</a> | <a href="#">CDH17</a>        | 8q22.1   |
| 1479 | <a href="#">AB018258</a>     | <a href="#">Hs.109358</a> | <a href="#">ATP10B</a>       | 5q34     |
| 1480 | <a href="#">NM_004963</a>    | <a href="#">Hs.524278</a> | <a href="#">GUCY2C</a>       | 12p13.1  |
| 1481 | <a href="#">NM_024791</a>    | <a href="#">Hs.374726</a> | <a href="#">PDZD3</a>        | 11q23.3  |
| 1482 | <a href="#">NM_000341</a>    | <a href="#">Hs.112916</a> | <a href="#">SLC3A1</a>       | 2p21     |
| 1483 | <a href="#">NM_005379</a>    | <a href="#">Hs.5394</a>   | <a href="#">MYO1A</a>        | 12q13.3  |
| 1484 | <a href="#">NM_003869</a>    | <a href="#">Hs.282975</a> | <a href="#">CES2</a>         | 16q22.1  |
| 1485 | <a href="#">NM_145202</a>    | <a href="#">Hs.15951</a>  | <a href="#">PRAP1</a>        | 10q26.3  |
| 1486 | <a href="#">NM_022097</a>    | <a href="#">Hs.178589</a> | <a href="#">LOC63928</a>     | 16p12.1  |
| 1487 | <a href="#">AK026416</a>     | <a href="#">Hs.280892</a> | <a href="#">FLJ22763</a>     | 3q13.13  |
| 1488 | <a href="#">NM_018663</a>    | <a href="#">Hs.430299</a> | <a href="#">PXMP2</a>        | 12q24.33 |
| 1489 | <a href="#">NM_000017</a>    | <a href="#">Hs.507076</a> | <a href="#">ACADS</a>        | 12q24.31 |
| 1490 | <a href="#">NM_006149</a>    | <a href="#">Hs.5302</a>   | <a href="#">LGALS4</a>       | 19q13.2  |
| 1491 | <a href="#">NM_003226</a>    | <a href="#">Hs.82961</a>  | <a href="#">TFF3</a>         | 21q22.3  |
| 1492 | <a href="#">NM_005971</a>    | <a href="#">Hs.301350</a> | <a href="#">FXD3</a>         | 19q13.12 |
| 1493 | <a href="#">NM_016614</a>    | <a href="#">Hs.403010</a> | <a href="#">TTRAP</a>        | 6p22.2   |
| 1494 | <a href="#">NM_022901</a>    | <a href="#">Hs.128071</a> | <a href="#">LRRC19</a>       | 9p21.2   |
| 1495 | <a href="#">A_24_P334208</a> |                           | <a href="#">A_24_P334208</a> | 2p11.2   |
| 1496 | <a href="#">NM_019062</a>    | <a href="#">Hs.124835</a> | <a href="#">RNF186</a>       | 1p36.13  |
| 1497 | <a href="#">NM_005814</a>    | <a href="#">Hs.651244</a> | <a href="#">GPA33</a>        | 1q24.1   |
| 1498 | <a href="#">NM_001644</a>    | <a href="#">Hs.560</a>    | <a href="#">APOBEC1</a>      | 12p13.31 |
| 1499 | <a href="#">NM_004616</a>    | <a href="#">Hs.170563</a> | <a href="#">TSPAN8</a>       | 12q21.1  |
| 1500 | <a href="#">NM_001039792</a> | <a href="#">Hs.208081</a> | <a href="#">UNQ338</a>       | 9p13.3   |
| 1501 | <a href="#">NM_003944</a>    | <a href="#">Hs.632460</a> | <a href="#">SELENBP1</a>     | 1q21.3   |
| 1502 | <a href="#">NM_015480</a>    | <a href="#">Hs.293917</a> | <a href="#">PVRL3</a>        | 3q13.13  |
| 1503 | <a href="#">BC017572</a>     | <a href="#">Hs.293917</a> | <a href="#">PVRL3</a>        | 3q13.13  |
| 1504 | <a href="#">NM_002591</a>    | <a href="#">Hs.1872</a>   | <a href="#">PCK1</a>         | 20q13.31 |
| 1505 | <a href="#">NM_001815</a>    | <a href="#">Hs.11</a>     | <a href="#">CEACAM3</a>      | 19q13.2  |

|      |                                 |                           |                            |          |
|------|---------------------------------|---------------------------|----------------------------|----------|
| 1506 | <a href="#">NM_004363</a>       | <a href="#">Hs.466814</a> | <a href="#">CEACAM5</a>    | 19q13.2  |
| 1507 | <a href="#">NM_006890</a>       | <a href="#">Hs.74466</a>  | <a href="#">CEACAM7</a>    | 19q13.2  |
| 1508 | <a href="#">NM_002483</a>       | <a href="#">Hs.466814</a> | <a href="#">CEACAM6</a>    | 19q13.2  |
| 1509 | <a href="#">BC005008</a>        | <a href="#">Hs.466814</a> | <a href="#">CEACAM6</a>    | 19q13.2  |
| 1510 | <a href="#">NM_001712</a>       | <a href="#">Hs.512682</a> | <a href="#">CEACAM1</a>    | 19q13.2  |
| 1511 | <a href="#">ENST00000343933</a> | <a href="#">Hs.113094</a> | <a href="#">CORO2A</a>     | 9q22.33  |
| 1512 | <a href="#">NM_000196</a>       | <a href="#">Hs.1376</a>   | <a href="#">HSD11B2</a>    | 16q22.1  |
| 1513 | <a href="#">AL137761</a>        | <a href="#">Hs.8379</a>   | <a href="#">FAM110C</a>    | 2p25.3   |
| 1514 | <a href="#">THC2650074</a>      |                           | <a href="#">THC2650074</a> | 9q32     |
| 1515 | <a href="#">NM_014585</a>       | <a href="#">Hs.643005</a> | <a href="#">SLC40A1</a>    | 2q32.2   |
| 1516 | <a href="#">NM_000765</a>       | <a href="#">Hs.111944</a> | <a href="#">CYP3A7</a>     | 7q22.1   |
| 1517 | <a href="#">NM_000777</a>       | <a href="#">Hs.150276</a> | <a href="#">CYP3A5</a>     | 7q22.1   |
| 1518 | <a href="#">NM_017460</a>       | <a href="#">Hs.654391</a> | <a href="#">CYP3A4</a>     | 7q22.1   |
| 1519 | <a href="#">NM_001979</a>       | <a href="#">Hs.212088</a> | <a href="#">EPHX2</a>      | 8p21.1   |
| 1520 | <a href="#">BC038245</a>        | <a href="#">Hs.335413</a> | <a href="#">BC038245</a>   | 22q13.2  |
| 1521 | <a href="#">CR624517</a>        | <a href="#">Hs.586321</a> | <a href="#">CR624517</a>   | 7p21.3   |
| 1522 | <a href="#">NM_194284</a>       | <a href="#">Hs.183617</a> | <a href="#">CLDN23</a>     | 8p23.1   |
| 1523 | <a href="#">NM_005218</a>       | <a href="#">Hs.32949</a>  | <a href="#">DEFB1</a>      | 8p23.1   |
| 1524 | <a href="#">NM_004861</a>       | <a href="#">Hs.17958</a>  | <a href="#">GAL3ST1</a>    | 22q12.2  |
| 1525 | <a href="#">NM_003500</a>       | <a href="#">Hs.444959</a> | <a href="#">ACOX2</a>      | 3p14.3   |
| 1526 | <a href="#">THC2706212</a>      |                           | <a href="#">THC2706212</a> | 4p16.1   |
| 1527 | <a href="#">NM_000903</a>       | <a href="#">Hs.406515</a> | <a href="#">NQO1</a>       | 16q22.1  |
| 1528 | <a href="#">AK131023</a>        | <a href="#">Hs.662541</a> | <a href="#">AK131023</a>   | 17q25.1  |
| 1529 | <a href="#">THC2770152</a>      |                           | <a href="#">THC2770152</a> | 20q11.23 |
| 1530 | <a href="#">NM_007197</a>       | <a href="#">Hs.31664</a>  | <a href="#">FZD10</a>      | 12q24.33 |
| 1531 | <a href="#">NM_002523</a>       | <a href="#">Hs.3281</a>   | <a href="#">NPTX2</a>      | 7q22.1   |
| 1532 | <a href="#">NM_058186</a>       | <a href="#">Hs.473877</a> | <a href="#">FAM3B</a>      | 21q22.3  |
| 1533 | <a href="#">NM_004683</a>       | <a href="#">Hs.77854</a>  | <a href="#">RGN</a>        | Xp11.3   |
| 1534 | <a href="#">NM_004010</a>       | <a href="#">Hs.495912</a> | <a href="#">DMD</a>        | Xp21.2   |
| 1535 | <a href="#">THC2729899</a>      |                           | <a href="#">THC2729899</a> | 4q21.22  |
| 1536 | <a href="#">NM_002986</a>       | <a href="#">Hs.54460</a>  | <a href="#">CCL11</a>      | 17q12    |
| 1537 | <a href="#">NM_014879</a>       | <a href="#">Hs.2465</a>   | <a href="#">P2RY14</a>     | 3q25.1   |
| 1538 | <a href="#">NM_014479</a>       | <a href="#">Hs.521459</a> | <a href="#">ADAMDEC1</a>   | 8p21.2   |
| 1539 | <a href="#">CR605298</a>        | <a href="#">Hs.676511</a> | <a href="#">LOC283904</a>  | 16q24.1  |
| 1540 | <a href="#">NM_024768</a>       | <a href="#">Hs.134807</a> | <a href="#">CCDC48</a>     | 3q21.3   |
| 1541 | <a href="#">XM_001133802</a>    | <a href="#">Hs.111902</a> | <a href="#">LOC729464</a>  | 16q24.1  |
| 1542 | <a href="#">NM_033380</a>       | <a href="#">Hs.369089</a> | <a href="#">COL4A5</a>     | Xq22.3   |
| 1543 | <a href="#">NM_004101</a>       | <a href="#">Hs.42502</a>  | <a href="#">F2RL2</a>      | 5q13.3   |
| 1544 | <a href="#">NM_000029</a>       | <a href="#">Hs.19383</a>  | <a href="#">AGT</a>        | 1q42.2   |
| 1545 | <a href="#">NM_004887</a>       | <a href="#">Hs.483444</a> | <a href="#">CXCL14</a>     | 5q31.1   |
| 1546 | <a href="#">NM_001463</a>       | <a href="#">Hs.128453</a> | <a href="#">FRZB</a>       | 2q32.1   |
| 1547 | <a href="#">NM_021229</a>       | <a href="#">Hs.201034</a> | <a href="#">NTN4</a>       | 12q22    |
| 1548 | <a href="#">AK091132</a>        | <a href="#">Hs.120633</a> | <a href="#">AK091132</a>   | 11q21    |
| 1549 | <a href="#">NM_005822</a>       | <a href="#">Hs.440168</a> | <a href="#">DSCR1L1</a>    | 6p12.3   |
| 1550 | <a href="#">ENST00000256861</a> |                           | <a href="#">ITIH5</a>      | 10p14    |
| 1551 | <a href="#">NM_015429</a>       | <a href="#">Hs.477015</a> | <a href="#">ABI3BP</a>     | 3q12.2   |
| 1552 | <a href="#">NM_002736</a>       | <a href="#">Hs.433068</a> | <a href="#">PRKAR2B</a>    | 7q22.3   |
| 1553 | <a href="#">NM_004657</a>       | <a href="#">Hs.26530</a>  | <a href="#">SDPR</a>       | 2q32.3   |
| 1554 | <a href="#">NM_022469</a>       | <a href="#">Hs.98206</a>  | <a href="#">GREM2</a>      | 1q43     |
| 1555 | <a href="#">NM_002825</a>       | <a href="#">Hs.371249</a> | <a href="#">PTN</a>        | 7q33     |
| 1556 | <a href="#">THC2609493</a>      |                           | <a href="#">THC2609493</a> | 7q31.1   |
| 1557 | <a href="#">NM_001017915</a>    | <a href="#">Hs.601911</a> | <a href="#">INPP5D</a>     | 2q37.1   |

|      |                                 |                           |                                 |          |
|------|---------------------------------|---------------------------|---------------------------------|----------|
| 1558 | <a href="#">NM_032432</a>       | <a href="#">Hs.233404</a> | <a href="#">ABLIM2</a>          | 4p16.1   |
| 1559 | <a href="#">NM_015205</a>       | <a href="#">Hs.29189</a>  | <a href="#">ATP11A</a>          | 13q34    |
| 1560 | <a href="#">NM_021101</a>       | <a href="#">Hs.439060</a> | <a href="#">CLDN1</a>           | 3q28     |
| 1561 | <a href="#">NM_033260</a>       | <a href="#">Hs.591352</a> | <a href="#">FOXQ1</a>           | 6p25.3   |
| 1562 | <a href="#">ENST00000309874</a> | <a href="#">Hs.599221</a> | <a href="#">ENST00000309874</a> | 15q15.1  |
| 1563 | <a href="#">BE004814</a>        | <a href="#">Hs.647409</a> | <a href="#">BE004814</a>        | 6p22.3   |
| 1564 | <a href="#">NM_002763</a>       | <a href="#">Hs.585369</a> | <a href="#">PROX1</a>           | 1q41     |
| 1565 | <a href="#">NM_004655</a>       | <a href="#">Hs.156527</a> | <a href="#">AXIN2</a>           | 17q24.1  |
| 1566 | <a href="#">AF078165</a>        | <a href="#">Hs.156527</a> | <a href="#">AXIN2</a>           | 17q24.1  |
| 1567 | <a href="#">NM_178493</a>       | <a href="#">Hs.106137</a> | <a href="#">NOTUM</a>           | 17q25.3  |
| 1568 | <a href="#">NM_033119</a>       | <a href="#">Hs.592059</a> | <a href="#">NKD1</a>            | 16q12.1  |
| 1569 | <a href="#">NM_153000</a>       | <a href="#">Hs.293274</a> | <a href="#">APCDD1</a>          | 18p11.22 |
| 1570 | <a href="#">THC2652817</a>      |                           | <a href="#">THC2652817</a>      | 16q12.1  |
| 1571 | <a href="#">NM_020416</a>       | <a href="#">Hs.479069</a> | <a href="#">PPP2R2C</a>         | 4p16.1   |
| 1572 | <a href="#">NM_018689</a>       | <a href="#">Hs.459088</a> | <a href="#">KIAA1199</a>        | 15q25.1  |
| 1573 | <a href="#">NM_006393</a>       | <a href="#">Hs.5025</a>   | <a href="#">NEBL</a>            | 10p12.31 |
| 1574 | <a href="#">NR_002307</a>       | <a href="#">Hs.381329</a> | <a href="#">MSX2P</a>           | 17q22    |
| 1575 | <a href="#">BC005081</a>        | <a href="#">Hs.663621</a> | <a href="#">BCAN</a>            | 1q23.1   |
| 1576 | <a href="#">BU540282</a>        | <a href="#">Hs.600805</a> | <a href="#">BU540282</a>        | 2p16.1   |
| 1577 | <a href="#">NM_002334</a>       | <a href="#">Hs.4930</a>   | <a href="#">LRP4</a>            | 11p11.2  |
| 1578 | <a href="#">AF132203</a>        | <a href="#">Hs.597496</a> | <a href="#">AF132203</a>        | 10q24.31 |
| 1579 | <a href="#">NM_002083</a>       | <a href="#">Hs.2704</a>   | <a href="#">GPX2</a>            | 14q23.3  |
| 1580 | <a href="#">NM_000740</a>       | <a href="#">Hs.7138</a>   | <a href="#">CHRM3</a>           | 1q43     |
| 1581 | <a href="#">NM_001017928</a>    | <a href="#">Hs.220594</a> | <a href="#">CCDC58</a>          | 3q21.1   |
| 1582 | <a href="#">BC030122</a>        | <a href="#">Hs.559426</a> | <a href="#">BC030122</a>        | 5q14.3   |
| 1583 | <a href="#">XM_933693</a>       | <a href="#">Hs.181156</a> | <a href="#">LOC440731</a>       | 1q42.2   |
| 1584 | <a href="#">D89479</a>          | <a href="#">Hs.129742</a> | <a href="#">SULT1B1</a>         | 4q13.3   |
| 1585 | <a href="#">NM_014465</a>       | <a href="#">Hs.129742</a> | <a href="#">SULT1B1</a>         | 4q13.3   |
| 1586 | <a href="#">NM_006418</a>       | <a href="#">Hs.559736</a> | <a href="#">OLFM4</a>           | 13q21.1  |
| 1587 | <a href="#">BX538051</a>        | <a href="#">Hs.149540</a> | <a href="#">BX538051</a>        | 1q25.2   |
| 1588 | <a href="#">NM_021010</a>       | <a href="#">Hs.655233</a> | <a href="#">DEFA5</a>           | 8p23.1   |
| 1589 | <a href="#">NM_001926</a>       | <a href="#">Hs.711</a>    | <a href="#">DEFA6</a>           | 8p23.1   |
| 1590 | <a href="#">NM_006017</a>       | <a href="#">Hs.614734</a> | <a href="#">PROM1</a>           | 4p15.32  |
| 1591 | <a href="#">NM_024677</a>       | <a href="#">Hs.590923</a> | <a href="#">NSUN7</a>           | 4p14     |
| 1592 | <a href="#">THC2732721</a>      |                           | <a href="#">THC2732721</a>      | 7q35     |
| 1593 | <a href="#">NM_032501</a>       | <a href="#">Hs.529353</a> | <a href="#">ACSS1</a>           | 20p11.21 |
| 1594 | <a href="#">AB075864</a>        | <a href="#">Hs.370555</a> | <a href="#">KIAA1984</a>        | 9q34.3   |
| 1595 | <a href="#">NM_032867</a>       | <a href="#">Hs.128196</a> | <a href="#">MICALCL</a>         | 11p15.3  |
| 1596 | <a href="#">NM_006671</a>       | <a href="#">Hs.104637</a> | <a href="#">SLC1A7</a>          | 1p32.3   |
| 1597 | <a href="#">BC004287</a>        | <a href="#">Hs.434957</a> | <a href="#">BC004287</a>        | 8q21.13  |
| 1598 | <a href="#">NM_007210</a>       | <a href="#">Hs.505575</a> | <a href="#">GALNT6</a>          | 12q13.13 |
| 1599 | <a href="#">NM_152673</a>       | <a href="#">Hs.599259</a> | <a href="#">MUC20</a>           | 3q29     |
| 1600 | <a href="#">AK095831</a>        | <a href="#">Hs.34447</a>  | <a href="#">AK095831</a>        | 5p15.2   |
| 1601 | <a href="#">BF803942</a>        | <a href="#">Hs.27621</a>  | <a href="#">BF803942</a>        | 5p15.2   |
| 1602 | <a href="#">NM_000218</a>       | <a href="#">Hs.95162</a>  | <a href="#">KCNQ1</a>           | 11p15.4  |
| 1603 | <a href="#">NM_001185</a>       | <a href="#">Hs.546239</a> | <a href="#">AZGP1</a>           | 7q22.1   |
| 1604 | <a href="#">NM_000238</a>       | <a href="#">Hs.647099</a> | <a href="#">KCNH2</a>           | 7q36.1   |
| 1605 | <a href="#">NM_021258</a>       | <a href="#">Hs.110915</a> | <a href="#">IL22RA1</a>         | 1p36.11  |
| 1606 | <a href="#">NM_004413</a>       | <a href="#">Hs.109</a>    | <a href="#">DPEP1</a>           | 16q24.3  |
| 1607 | <a href="#">AL359055</a>        | <a href="#">Hs.547764</a> | <a href="#">AL359055</a>        | 7p15.3   |
| 1608 | <a href="#">THC2512199</a>      |                           | <a href="#">THC2512199</a>      | 7p15.3   |
| 1609 | <a href="#">BC033117</a>        | <a href="#">Hs.224879</a> | <a href="#">LOC645249</a>       | 7q36.3   |

|      |                                 |                           |                                 |          |
|------|---------------------------------|---------------------------|---------------------------------|----------|
| 1610 | <a href="#">AW979273</a>        | <a href="#">Hs.598388</a> | <a href="#">AW979273</a>        | 7p15.3   |
| 1611 | <a href="#">A_32_P25065</a>     |                           | <a href="#">A_32_P25065</a>     | 19p13.11 |
| 1612 | <a href="#">NM_000245</a>       | <a href="#">Hs.132966</a> | <a href="#">MET</a>             | 7q31.2   |
| 1613 | <a href="#">NM_032951</a>       | <a href="#">Hs.647055</a> | <a href="#">MLXIPL</a>          | 7q11.23  |
| 1614 | <a href="#">NM_021977</a>       | <a href="#">Hs.567337</a> | <a href="#">SLC22A3</a>         | 6q25.3   |
| 1615 | <a href="#">NM_001955</a>       | <a href="#">Hs.511899</a> | <a href="#">EDN1</a>            | 6p24.1   |
| 1616 | <a href="#">NM_002655</a>       | <a href="#">Hs.14968</a>  | <a href="#">PLAG1</a>           | 8q12.1   |
| 1617 | <a href="#">AK094963</a>        | <a href="#">Hs.657374</a> | <a href="#">FLJ37644</a>        | 17q24.3  |
| 1618 | <a href="#">NM_001399</a>       | <a href="#">Hs.105407</a> | <a href="#">EDA</a>             | Xq13.1   |
| 1619 | <a href="#">BC032913</a>        | <a href="#">Hs.97540</a>  | <a href="#">LOC389023</a>       | 2q14.1   |
| 1620 | <a href="#">NM_153270</a>       | <a href="#">Hs.448572</a> | <a href="#">KLHL34</a>          | Xp22.12  |
| 1621 | <a href="#">NM_005396</a>       | <a href="#">Hs.423598</a> | <a href="#">PNLIPRP2</a>        | 10q25.3  |
| 1622 | <a href="#">NM_004164</a>       | <a href="#">Hs.655516</a> | <a href="#">RBP2</a>            | 3q23     |
| 1623 | <a href="#">AK130456</a>        | <a href="#">Hs.200573</a> | <a href="#">AK130456</a>        | 6p22.1   |
| 1624 | <a href="#">NM_022144</a>       | <a href="#">Hs.132957</a> | <a href="#">TNMD</a>            | Xq22.1   |
| 1625 | <a href="#">NM_001045</a>       | <a href="#">Hs.591192</a> | <a href="#">SLC6A4</a>          | 17q11.2  |
| 1626 | <a href="#">THC2669157</a>      |                           | <a href="#">THC2669157</a>      | 10q22.1  |
| 1627 | <a href="#">NM_006308</a>       | <a href="#">Hs.41707</a>  | <a href="#">HSPB3</a>           | 5q11.2   |
| 1628 | <a href="#">THC2706471</a>      |                           | <a href="#">THC2706471</a>      | 9q13     |
| 1629 | <a href="#">AW901755</a>        |                           | <a href="#">AW901755</a>        | 5q15     |
| 1630 | <a href="#">NM_025152</a>       | <a href="#">Hs.288981</a> | <a href="#">NUBPL</a>           | 14q12    |
| 1631 | <a href="#">NM_001005353</a>    | <a href="#">Hs.10862</a>  | <a href="#">AK3L1</a>           | 1p31.3   |
| 1632 | <a href="#">NM_080759</a>       | <a href="#">Hs.129452</a> | <a href="#">DACH1</a>           | 13q21.33 |
| 1633 | <a href="#">BC037328</a>        | <a href="#">Hs.49329</a>  | <a href="#">BC037328</a>        | 17q24.3  |
| 1634 | <a href="#">AY358469</a>        | <a href="#">Hs.632511</a> | <a href="#">LOC646627</a>       | 1q44     |
| 1635 | <a href="#">NM_019018</a>       | <a href="#">Hs.591751</a> | <a href="#">FAM105A</a>         | 5p15.2   |
| 1636 | <a href="#">AK125648</a>        | <a href="#">Hs.155085</a> | <a href="#">AK125648</a>        | 5p15.2   |
| 1637 | <a href="#">NM_000880</a>       | <a href="#">Hs.591873</a> | <a href="#">IL7</a>             | 8q21.12  |
| 1638 | <a href="#">THC2692456</a>      |                           | <a href="#">THC2692456</a>      | 1p32.1   |
| 1639 | <a href="#">NM_017781</a>       | <a href="#">Hs.272795</a> | <a href="#">CYP2W1</a>          | 7p22.3   |
| 1640 | <a href="#">NM_032251</a>       | <a href="#">Hs.98564</a>  | <a href="#">CCDC88</a>          | 11q13.1  |
| 1641 | <a href="#">ENST00000305119</a> | <a href="#">Hs.489355</a> | <a href="#">MUC12</a>           | 7q22.1   |
| 1642 | <a href="#">A_32_P112263</a>    |                           | <a href="#">A_32_P112263</a>    | 6q13     |
| 1643 | <a href="#">NM_004923</a>       | <a href="#">Hs.145932</a> | <a href="#">MTL5</a>            | 11q13.2  |
| 1644 | <a href="#">NM_018291</a>       | <a href="#">Hs.444301</a> | <a href="#">FLJ10986</a>        | 1p32.1   |
| 1645 | <a href="#">NM_152891</a>       | <a href="#">Hs.280658</a> | <a href="#">PRSS33</a>          | 16p13.3  |
| 1646 | <a href="#">NM_030615</a>       | <a href="#">Hs.150013</a> | <a href="#">KIF25</a>           | 6q27     |
| 1647 | <a href="#">AK093351</a>        | <a href="#">Hs.297967</a> | <a href="#">FLJ36032</a>        | 1q21.3   |
| 1648 | <a href="#">NM_152358</a>       | <a href="#">Hs.414175</a> | <a href="#">C19orf41</a>        | 19q13.33 |
| 1649 | <a href="#">XR_017750</a>       |                           | <a href="#">NANOS3</a>          | 19p13.12 |
| 1650 | <a href="#">NM_025243</a>       | <a href="#">Hs.221597</a> | <a href="#">SLC19A3</a>         | 2q36.3   |
| 1651 | <a href="#">NM_003636</a>       | <a href="#">Hs.440497</a> | <a href="#">KCNAB2</a>          | 1p36.31  |
| 1652 | <a href="#">NM_001333</a>       | <a href="#">Hs.660866</a> | <a href="#">CTSL2</a>           | 9q22.33  |
| 1653 | <a href="#">NM_152709</a>       | <a href="#">Hs.37636</a>  | <a href="#">STOX1</a>           | 10q21.3  |
| 1654 | <a href="#">THC2700133</a>      |                           | <a href="#">THC2700133</a>      | 19p12    |
| 1655 | <a href="#">NM_006644</a>       | <a href="#">Hs.36927</a>  | <a href="#">HSPH1</a>           | 13q12.3  |
| 1656 | <a href="#">ENST00000379426</a> |                           | <a href="#">ENST00000379426</a> | 6p24.1   |
| 1657 | <a href="#">NM_014467</a>       | <a href="#">Hs.306339</a> | <a href="#">SRPX2</a>           | Xq22.1   |
| 1658 | <a href="#">NM_017549</a>       | <a href="#">Hs.563491</a> | <a href="#">EPDR1</a>           | 7p14.1   |
| 1659 | <a href="#">NM_015352</a>       | <a href="#">Hs.472409</a> | <a href="#">POFUT1</a>          | 20q11.21 |
| 1660 | <a href="#">NM_080672</a>       | <a href="#">Hs.473218</a> | <a href="#">PHACTR3</a>         | 20q13.32 |
| 1661 | <a href="#">NM_015515</a>       | <a href="#">Hs.9029</a>   | <a href="#">KRT23</a>           | 17q21.2  |

|      |                                 |                           |                            |          |
|------|---------------------------------|---------------------------|----------------------------|----------|
| 1662 | <a href="#">NM_001010853</a>    | <a href="#">Hs.652106</a> | <a href="#">ACY1L2</a>     | 6q15     |
| 1663 | <a href="#">NM_003279</a>       | <a href="#">Hs.182421</a> | <a href="#">TNNC2</a>      | 20q13.12 |
| 1664 | <a href="#">NM_002623</a>       | <a href="#">Hs.91161</a>  | <a href="#">PFDN4</a>      | 20q13.2  |
| 1665 | <a href="#">NM_002467</a>       | <a href="#">Hs.202453</a> | <a href="#">MYC</a>        | 8q24.21  |
| 1666 | <a href="#">NM_144583</a>       | <a href="#">Hs.580464</a> | <a href="#">ATP6V1C2</a>   | 2p25.1   |
| 1667 | <a href="#">NM_004485</a>       | <a href="#">Hs.591531</a> | <a href="#">GNG4</a>       | 1q42.3   |
| 1668 | <a href="#">NM_030667</a>       | <a href="#">Hs.160871</a> | <a href="#">PTPRO</a>      | 12p12.3  |
| 1669 | <a href="#">NM_016653</a>       | <a href="#">Hs.444451</a> | <a href="#">ZAK</a>        | 2q31.1   |
| 1670 | <a href="#">NM_004289</a>       | <a href="#">Hs.404741</a> | <a href="#">NFE2L3</a>     | 7p15.2   |
| 1671 | <a href="#">ENST00000211092</a> | <a href="#">Hs.130714</a> | <a href="#">LOC284422</a>  | 19p13.3  |
| 1672 | <a href="#">NM_003260</a>       | <a href="#">Hs.332173</a> | <a href="#">TLE2</a>       | 19p13.3  |
| 1673 | <a href="#">NM_020686</a>       | <a href="#">Hs.336768</a> | <a href="#">ABAT</a>       | 16p13.2  |
| 1674 | <a href="#">NM_002657</a>       | <a href="#">Hs.154104</a> | <a href="#">PLAGL2</a>     | 20q11.21 |
| 1675 | <a href="#">BC010544</a>        | <a href="#">Hs.660769</a> | <a href="#">BC010544</a>   | 19p13.3  |
| 1676 | <a href="#">NM_000142</a>       | <a href="#">Hs.1420</a>   | <a href="#">FGFR3</a>      | 4p16.3   |
| 1677 | <a href="#">ENST00000353250</a> |                           | <a href="#">PIWIL2</a>     | 8p21.3   |
| 1678 | <a href="#">NM_152321</a>       | <a href="#">Hs.162143</a> | <a href="#">ERP27</a>      | 12p12.3  |
| 1679 | <a href="#">NM_003122</a>       | <a href="#">Hs.407856</a> | <a href="#">SPINK1</a>     | 5q32     |
| 1680 | <a href="#">NM_001008494</a>    | <a href="#">Hs.567637</a> | <a href="#">ISX</a>        | 22q12.3  |
| 1681 | <a href="#">NM_001445</a>       | <a href="#">Hs.519719</a> | <a href="#">FABP6</a>      | 5q33.3   |
| 1682 | <a href="#">THC2671575</a>      |                           | <a href="#">THC2671575</a> |          |
| 1683 | <a href="#">NM_003114</a>       | <a href="#">Hs.591866</a> | <a href="#">SPAG1</a>      | 8q22.2   |
| 1684 | <a href="#">NM_007052</a>       | <a href="#">Hs.592227</a> | <a href="#">NOX1</a>       | Xq22.1   |
| 1685 | <a href="#">NM_013955</a>       | <a href="#">Hs.592227</a> | <a href="#">NOX1</a>       | Xq22.1   |
| 1686 | <a href="#">NM_013954</a>       | <a href="#">Hs.592227</a> | <a href="#">NOX1</a>       | Xq22.1   |
| 1687 | <a href="#">NM_000790</a>       | <a href="#">Hs.359698</a> | <a href="#">DDC</a>        | 7p12.2   |
| 1688 | <a href="#">NM_021804</a>       | <a href="#">Hs.178098</a> | <a href="#">ACE2</a>       | Xp22.2   |
| 1689 | <a href="#">NM_000047</a>       | <a href="#">Hs.386975</a> | <a href="#">ARSE</a>       | Xp22.33  |
| 1690 | <a href="#">THC2696614</a>      |                           | <a href="#">THC2696614</a> | Xp22.33  |
| 1691 | <a href="#">NM_003889</a>       | <a href="#">Hs.7303</a>   | <a href="#">NR1I2</a>      | 3q13.33  |
| 1692 | <a href="#">NM_170693</a>       | <a href="#">Hs.300863</a> | <a href="#">SGK2</a>       | 20q13.12 |
| 1693 | <a href="#">NM_173216</a>       | <a href="#">Hs.207459</a> | <a href="#">ST6GAL1</a>    | 3q27.3   |
| 1694 | <a href="#">NM_033427</a>       | <a href="#">Hs.592285</a> | <a href="#">CTTNBP2</a>    | 7q31.2   |
| 1695 | <a href="#">NM_000492</a>       | <a href="#">Hs.489786</a> | <a href="#">CFTR</a>       | 7q31.2   |
| 1696 | <a href="#">NM_017763</a>       | <a href="#">Hs.656319</a> | <a href="#">RNF43</a>      | 17q22    |
| 1697 | <a href="#">NM_005170</a>       | <a href="#">Hs.152475</a> | <a href="#">ASCL2</a>      | 11p15.5  |
| 1698 | <a href="#">NM_014324</a>       | <a href="#">Hs.508343</a> | <a href="#">AMACR</a>      | 5p13.3   |
| 1699 | <a href="#">NM_030949</a>       | <a href="#">Hs.486798</a> | <a href="#">PPP1R14C</a>   | 6q25.1   |
| 1700 | <a href="#">NM_025113</a>       | <a href="#">Hs.98117</a>  | <a href="#">C13orf18</a>   | 13q14.12 |
| 1701 | <a href="#">NM_014298</a>       | <a href="#">Hs.513484</a> | <a href="#">QPRT</a>       | 16p11.2  |
| 1702 | <a href="#">BG114486</a>        | <a href="#">Hs.592544</a> | <a href="#">BG114486</a>   | 16p11.2  |
| 1703 | <a href="#">NM_003270</a>       | <a href="#">Hs.43233</a>  | <a href="#">TSPAN6</a>     | Xq22.1   |
| 1704 | <a href="#">NM_006113</a>       | <a href="#">Hs.267659</a> | <a href="#">VAV3</a>       | 1p13.3   |
| 1705 | <a href="#">NM_144704</a>       | <a href="#">Hs.163543</a> | <a href="#">AIFM3</a>      | 22q11.21 |
| 1706 | <a href="#">NM_015265</a>       | <a href="#">Hs.516617</a> | <a href="#">SATB2</a>      | 2q33.1   |
| 1707 | <a href="#">THC2678045</a>      |                           | <a href="#">THC2678045</a> | 6q27     |
| 1708 | <a href="#">NM_000845</a>       | <a href="#">Hs.449625</a> | <a href="#">GRM8</a>       | 7q31.33  |
| 1709 | <a href="#">NM_000933</a>       | <a href="#">Hs.472101</a> | <a href="#">PLCB4</a>      | 20p12.2  |
| 1710 | <a href="#">NM_005021</a>       | <a href="#">Hs.486489</a> | <a href="#">ENPP3</a>      | 6q23.2   |
| 1711 | <a href="#">NM_018296</a>       | <a href="#">Hs.125139</a> | <a href="#">LRRC36</a>     | 16q22.1  |
| 1712 | <a href="#">NM_003212</a>       | <a href="#">Hs.385870</a> | <a href="#">TDGF1</a>      | 3p21.31  |
| 1713 | <a href="#">NM_014553</a>       | <a href="#">Hs.156471</a> | <a href="#">TFCP2L1</a>    | 2q14.2   |

|      |                           |                           |                          |          |
|------|---------------------------|---------------------------|--------------------------|----------|
| 1714 | <a href="#">L33930</a>    | <a href="#">Hs.644105</a> | <a href="#">CD24</a>     | Yq11.222 |
| 1715 | <a href="#">BX413550</a>  | <a href="#">Hs.688325</a> | <a href="#">BX413550</a> | Yq11.222 |
| 1716 | <a href="#">NM_001657</a> | <a href="#">Hs.270833</a> | <a href="#">AREG</a>     | 4q13.3   |
| 1717 | <a href="#">NM_001432</a> | <a href="#">Hs.115263</a> | <a href="#">EREG</a>     | 4q13.3   |
| 1718 | <a href="#">NM_018407</a> | <a href="#">Hs.492314</a> | <a href="#">LAPTM4B</a>  | 8q22.1   |
| 1719 | <a href="#">NM_003878</a> | <a href="#">Hs.78619</a>  | <a href="#">GGH</a>      | 8q12.3   |
| 1720 | <a href="#">NM_013296</a> | <a href="#">Hs.584901</a> | <a href="#">GPSM2</a>    | 1p13.3   |
| 1721 | <a href="#">NM_001338</a> | <a href="#">Hs.693697</a> | <a href="#">CXADR</a>    | 21q21.1  |
| 1722 | <a href="#">AL834140</a>  | <a href="#">Hs.677892</a> | <a href="#">AL834140</a> | 15q11.2  |
